# Supplementary material for: One-pot preparation of pyrazole “turn on” and “turn off” fluorescent sensors for Zn2+ and Cd2+ directly from chalcones via in situ aromatisation
Source: Royal Society of Chemistry journal article supplement (doi:10.1039/d4nj02433h), 2024-01-01

## Electronic Supplementary Information (ESI)

### One-pot preparation of pyrazole “turn on” and “turn off” fluorescent sensors for Zn<sup>2+</sup> and Cd<sup>2+</sup> directly from chalcones via *in situ* aromatisation

Alexander Ciupa\*

### General Experimental

Chemicals, solvents and reagents were purchased from commercial sources and used without further purification. PE refers to petroleum ether, bp 40-60 °C. Spectroscopy was performed with CHROMASOLV<sup>®</sup> gradient grade acetonitrile for HPLC, ≥99.9%, from Sigma-Aldrich.

The metal complexes used in this study were: LiCl, NaCl, KCl, CaCl<sub>2</sub>, MgCl<sub>2</sub>, CuCl<sub>2</sub>, CuSO<sub>4</sub>, Cu(OAc)<sub>2</sub>, NiCl<sub>2</sub>, ZnCl<sub>2</sub>, CdCl<sub>2</sub>, RuCl<sub>3</sub>, CoCl<sub>2</sub>, MnCl<sub>2</sub>, PbCl<sub>2</sub>, ZnCl<sub>2</sub>, FeSO<sub>4</sub> and FeCl<sub>3</sub>.

TLCs were carried out on Merck Aluminium backed TLC plates Silica Gel 60 F254 and viewed using UV light of wavelength 254 nm. Merck Silica Gel (0.040-0.063 mm) was used for column chromatography. Compounds were loaded as an oil, CH<sub>2</sub>Cl<sub>2</sub> solution or dry loaded by adsorption onto silica.

NMR spectra were obtained on a Bruker Avance III (400 MHz) spectrometer and processed via TopSpin<sup>®</sup> software. The chemical shifts are recorded in parts per million (ppm) with reference to tetramethylsilane. The coupling constants J are quoted to the nearest 0.5 Hz and are not corrected.

High resolution Mass spectroscopy was performed on Bruker Quadrupole Time-of-Flight (qToF) mass spectrometer.

UV/Vis spectroscopy was performed on an Agilent Cary5000 in quartz cuvettes with a 1 cm pathlength using HPLC grade MeCN, 250-500 nm range with 0.2 sec dwell time. Detector switchover occurred at 350 nm.

FTIR spectroscopy was performed on a Bruker VERTEX 70 spectrometer.

Fluorescence spectroscopy was performed on an Edinburgh Instruments FLS1000 with a xenon excitation source, 2 nm bandwidths for both excitation and emission monochromator, scan speed of 1 nm and dwell time of 0.2 sec. Fluorescence quartz cuvettes with a 1 cm pathlength were used throughout with HPLC grade MeCN.

An Agilent LC-MS 1260 system with 40% MeOH, 60% H<sub>2</sub>O (with 1% Formic acid) isocratic flow rate of 1mL/min on a 250 mm C<sub>18</sub> ZORBAX column with detection at 254 nm. Mass spectrometer was in MM-APCI mode with a scan of 50 -400 m/z.

A 100 Watt 365 nm Analytikjena High intensity UV lamp or 254 nm 6 Watt Analytikjena TLC lamp was used for images of samples in cuvettes.

All figures were plotted using SigmaPlot<sup>®</sup> 14.5 software.

## General Synthesis

### Synthesis of (E)-3-phenyl-1-(pyridin-2-yl)prop-2-en-1-one (**C1**)

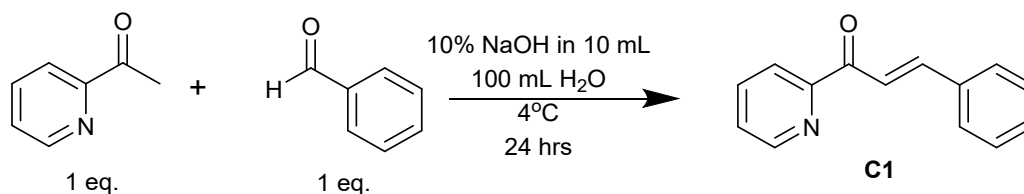

Using the methods previously reported (*Org. Biomol. Chem.*, 2012, **10**, 8753) 2-acetylpyridine (20 mmol) was added to a solution of benzaldehyde (20 mmol) in 100 mL water. 10 mL of a 10% NaOH solution was added, the mixture shaken for several minutes and then left at 4°C for 24 hours. After 24 hours the solid precipitate was filtered, washed with cold water and dried to afford **C1** (3.31 g, 79%).

### Synthesis of C2-C9

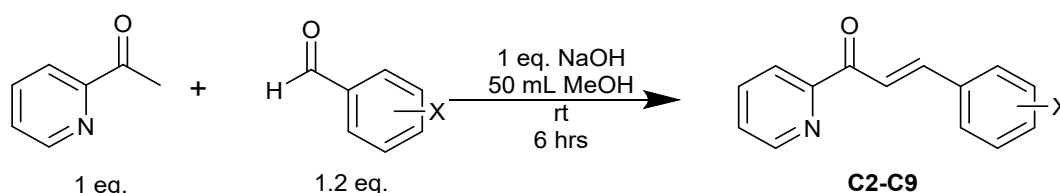

The following general method was adapted from the literature (*RSC Adv.*, 2015, **5**, 21445). 2-acetylpyridine (5 mmol) was added to a solution of the required substituted aldehyde (6 mmol) in 50 mL MeOH at room temperature. NaOH (5 mmol) was added and stirring continued at room temperature for 6 hrs after which the solution was removed under reduced pressure. The residue was resuspended in cold H<sub>2</sub>O and filtered to afford the required chalcone which was further purified by recrystallization from diethyl ether.

### Synthesis of P1-P9

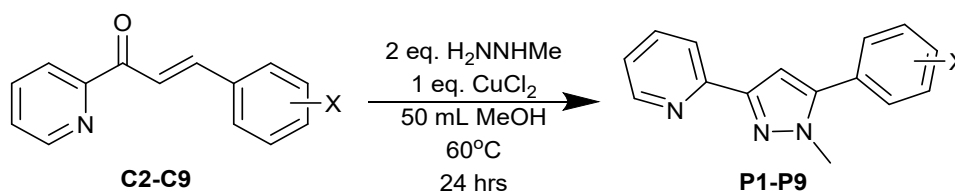

Methylhydrazine (2 mmol) was added to a stirred solution of required chalcone (1 mmol) in 50 mL MeOH followed by the addition of CuCl<sub>2</sub> (1 mmol) and heated at 60°C for 24 hrs. After 24 hrs the solution was removed under reduced pressure, the residue resuspended in 100 mL of a saturated EDTA solution and extracted with ethyl acetate (3 x 50 mL). The ethyl acetate layers were combined, and solvent removed under reduced pressure. The residue was then purified by column chromatography using petroleum ether: ethyl acetate (80:20) to afford the required pyrazole.

Synthesis of (E)-3-phenyl-1-(pyridin-2-yl)prop-2-en-1-one (**C1**)

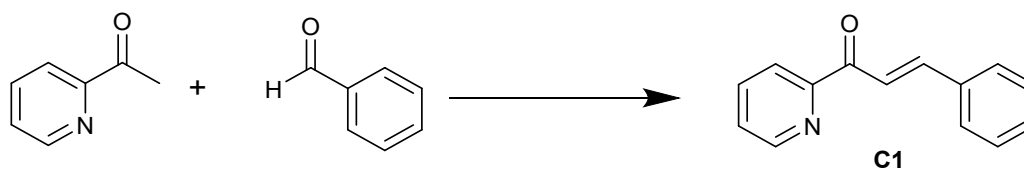

**Yield** 3.31g (79%);

**Vmax** (Solid)/cm<sup>-1</sup> 1677, 1316 and 753;

**<sup>1</sup>H NMR** δ<sub>H</sub> (400 MHz; CDCl<sub>3</sub>) 7.43-7.49 (3 H, m, CH), 7.50-7.52 (1 H, m, CH), 7.74-7.76 (2 H, m, CH), 7.87-7.90 (1 H, m, CH), 7.90 (2 H, d, *J* = 16 Hz, CH), 8.20-8.22 (1 H, m, CH), 8.22 (1 H, d, *J* = 16 Hz, CH) and 8.76-8.77 (1 H, m, CH);

**<sup>13</sup>C NMR** δ<sub>C</sub> (400 MHz; CDCl<sub>3</sub>) 120.9, 122.9, 127.0, 128.4, 128.9, 130.6, 135.2, 137.0, 144.8, 148.9, 154.2 and 189.5;

**HRMS m/z (qToF)** Found 210.2576 (M+H<sup>+</sup>). C<sub>14</sub>H<sub>11</sub>NO requires 210.2560.

Synthesis of (E)-3-(4-fluorophenyl)-1-(pyridin-2-yl)prop-2-en-1-one (**C2**)

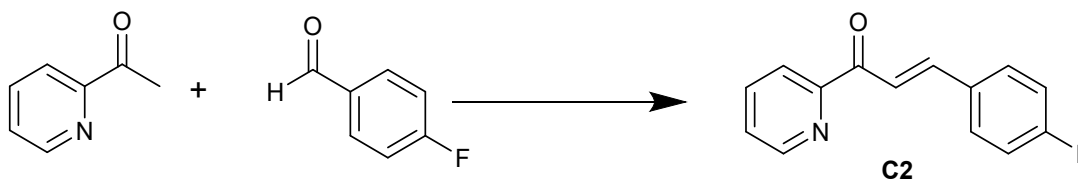

**Yield** 0.780g (68%);

**Vmax** (Solid)/cm<sup>-1</sup> 1697, 1597, 1215 and 762;

**<sup>1</sup>H NMR** δ<sub>H</sub> (400 MHz; CDCl<sub>3</sub>) 7.11-7.15 (2 H, m, CH), 7.50-7.53 (1 H, m, CH), 7.73-7.76 (2 H, m, CH), 7.88-7.94 (2 H, m, CH), 8.20-8.28 (2 H, m, CH) and 8.75-8.77 (1 H, m, CH);

**<sup>13</sup>C NMR** δ<sub>C</sub> (400 MHz; CDCl<sub>3</sub>) 115.9, 116.1, 120.6, 123.0, 127.0, 130.1, 131.4, 137.1, 143.4, 148.9, 154.1 and 189.3;

**HRMS m/z (qToF)** Found 228.2413 (M+H<sup>+</sup>). C<sub>14</sub>H<sub>10</sub>FNO requires 228.2464.

In agreement with H. M. Faidallah, M. M. Al-Mohammadi, K. A. Alamry and K. A. Khan, *J. Enzyme Inhib. Med. Chem.*, 2016, **31**, 157–163

Synthesis of (E)-3-(4-chlorophenyl)-1-(pyridin-2-yl)prop-2-en-1-one (**C3**)

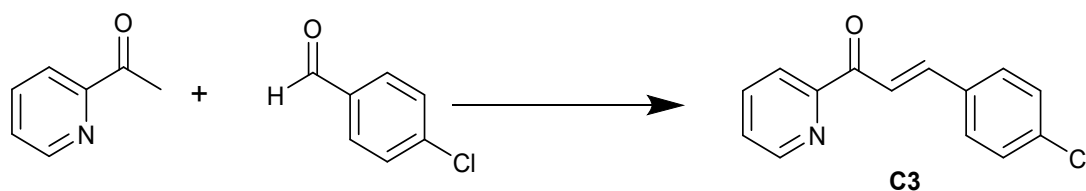

**Yield** 0.84g (69%);

**V<sub>max</sub>** (Solid)/cm<sup>-1</sup> 1697, 1580, 1230 and 762;

**<sup>1</sup>H NMR** δ<sub>H</sub> (400 MHz; CDCl<sub>3</sub>) 7.40-7.50 (2 H, m, CH), 7.51-7.54 (1 H, m, CH), 7.67-7.70 (2 H, m, CH), 7.88-7.92 (2 H, m, CH), 8.20-8.22 (1 H, m, CH), 8.28-8.33 (1 H, d, *J* = 16.4 Hz, CH) and 8.76-8.77 (1 H, m, CH);

**<sup>13</sup>C NMR** δ<sub>C</sub> (400 MHz; CDCl<sub>3</sub>) 121.3, 123.0, 127.0, 129.1, 130.0, 133.7, 136.4, 137.1, 143.2, 148.9, 154.1, 189.3;

**HRMS m/z (qToF)** Found 244.7029 (M+H<sup>+</sup>). C<sub>14</sub>H<sub>10</sub>ClNO requires 244.6980.

In agreement with J. Majeed, M. Shaharyar, *J. Enzyme Inhib. Med. Chem.* 2011, **26**, 819.

Synthesis of (E)-3-(4-bromophenyl)-1-(pyridin-2-yl)prop-2-en-1-one (**C4**)

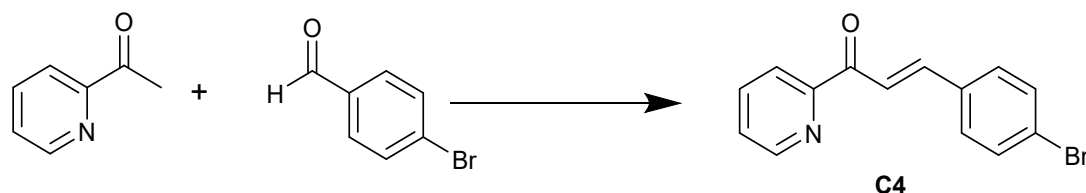

**Yield** 1.33g (92%);

**V<sub>max</sub>** (Solid)/cm<sup>-1</sup> 1695, 1509 and 742;

**<sup>1</sup>H NMR** δ<sub>H</sub> (400 MHz; CDCl<sub>3</sub>) 7.50-7.54 (1 H, m, CH), 7.58-7.63 (4 H, m, CH), 7.86-7.92 (2 H, m, CH), 8.20-8.22 (1 H, m, CH), 8.32 (1 H, d, *J* = 16 Hz, CH) and 8.76-8.77 (1 H, m, CH);

**<sup>13</sup>C NMR** δ<sub>C</sub> (400 MHz; CDCl<sub>3</sub>) 121.5, 123.0, 124.9, 127.0, 130.2, 132.1, 134.1, 137.1, 143.2, 148.9, 154.1 and 189.3;

**HRMS m/z (qToF)** Found 289.1585 (M+H<sup>+</sup>). C<sub>14</sub>H<sub>10</sub>BrNO requires 289.1520.

In agreement with Y.J. Ren, Z.C. Wang, X. Zhang, H.Y. Qiu, P.F. Wang, H.B. Gong, A.Q. Jiang, H.L. Zhu, *RSC Adv.*, 2015, **5**, 21445-21454.

Synthesis of (E)-3-(4-iodophenyl)-1-(pyridin-2-yl)prop-2-en-1-one (**C5**)

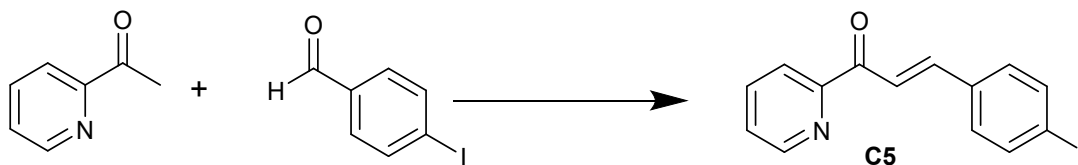

**Yield** 0.96g (57%);

**Vmax** (Solid)/cm<sup>-1</sup> 1672, 1642 and 714;

**<sup>1</sup>H NMR** δ<sub>H</sub> (400 MHz; CDCl<sub>3</sub>) 7.46-7.51 (2 H, m, CH), 7.53-7.54 (1 H, m, CH), 7.78-7.79 (2 H, m, CH), 7.88-7.90 (2 H, m, CH), 8.20-8.22 (1 H, m, CH), 8.33 (1 H, d, *J* = 16 Hz, CH), 8.76-8.77 (1 H, m, CH);

**<sup>13</sup>C NMR** δ<sub>C</sub> (400 MHz; CDCl<sub>3</sub>) 121.5, 123.0, 127.0, 130.0, 134.7, 137.1, 138.1, 143.4, 148.9, 154.0 and 191.4;

**HRMS m/z (qToF)** Found 336.1466 (M+H<sup>+</sup>). C<sub>14</sub>H<sub>10</sub>I<sub>1</sub>NO requires 336.1525.

Synthesis of (E)-3-(4-methoxyphenyl)-1-(pyridin-2-yl)prop-2-en-1-one (**C6**)

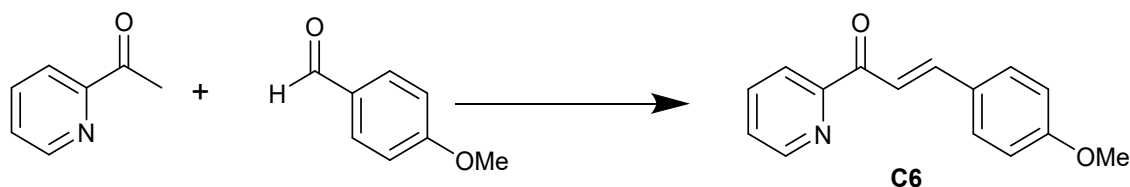

**Yield** 0.80g (67%);

**Vmax** (Solid)/cm<sup>-1</sup> 1642, 1511, 1215 and 1027;

**<sup>1</sup>H NMR** δ<sub>H</sub> (400 MHz; CDCl<sub>3</sub>) 3.95 (3 H, s, CH<sub>3</sub>), 7.47-7.51 (1 H, m, CH), 7.70-7.72 (2 H, m, CH), 7.87-7.96 (2 H, m, CH), 8.18-8.22 (2 H, m, CH) and 8.75-8.77 (1 H, m, CH);

**<sup>13</sup>C NMR** δ<sub>C</sub> (400 MHz; CDCl<sub>3</sub>) 55.4, 114.3, 118.5, 122.9, 126.7, 128.0, 131.0, 132.0, 137.0, 144.7, 148.9, 154.5, 161.8 and 189.4;

**HRMS m/z (qToF)** Found 240.2812 (M+H<sup>+</sup>). C<sub>16</sub>H<sub>14</sub>NO<sub>2</sub> requires 240.2820.

Synthesis of (E)-4-(3-oxo-3-(pyridin-2-yl)prop-1-en-1-yl)benzonitrile (**C7**)

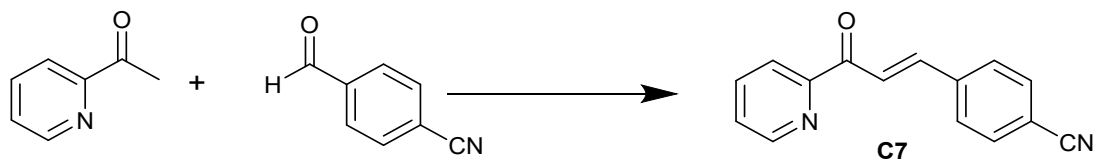

**Yield** 0.45g (38%);

**Vmax** (Solid)/cm<sup>-1</sup> 1642, 1521 and 1203;

**<sup>1</sup>H NMR** δ<sub>H</sub> (400 MHz; CDCl<sub>3</sub>) 7.53-7.56 (1 H, m, CH), 7.72-7.74 (2 H, m, CH), 7.82-7.84 (2 H, m, CH), 7.88- 7.93 (2 H, m, CH), 8.21-8.23 (1 H, m, CH), 8.40 (1 H, d, *J* = 16 Hz, CH) and 8.77-8.78 (1 H, m, CH);

**<sup>13</sup>C NMR** δ<sub>C</sub> (400 MHz; CDCl<sub>3</sub>) 113.4, 118.5, 123.1, 124.1, 127.3, 129.0, 132.6, 117.3, 139.5, 141.9, 149.0, 153.7 and 189.0;

**HRMS m/z (qToF)** Found 235.2704 (M+H<sup>+</sup>). C<sub>15</sub>H<sub>10</sub>N<sub>2</sub>O requires 235.2660.

Synthesis of (E)-3-(4-nitrophenyl)-1-(pyridin-2-yl)prop-2-en-1-one (**C8**)

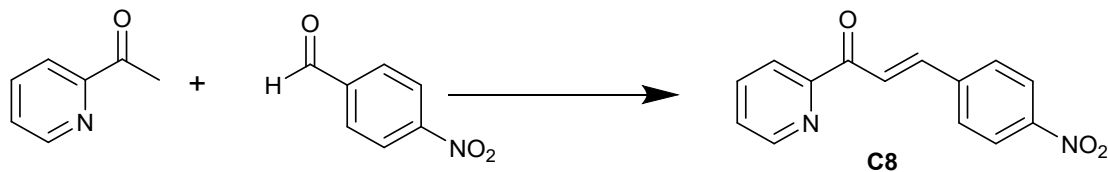

**Yield** 0.87g (69%);

**Vmax** (Solid)/cm<sup>-1</sup> 1596, 1511, 1217 and 748;

**<sup>1</sup>H NMR** δ<sub>H</sub> (400 MHz; CDCl<sub>3</sub>) 7.54-7.52 (1 H, m, CH), 7.88-7.97 (4 H, m, CH), 8.22-8.24 (1 H, m, CH), 8.29-8.31 (2 H, m, CH), 8.45 (1 H, d, *J* = 16.4 Hz, CH), 8.77-8.79 (1 H, m, CH);

**<sup>13</sup>C NMR** δ<sub>C</sub> (400 MHz; CDCl<sub>3</sub>) 123.1, 124.1, 124.9, 127.4, 129.3, 137.2, 141.2, 141.3, 148.6, 149.0, 153.6, 188.6;

**HRMS m/z (qToF)** Found 255.2456 (M+H<sup>+</sup>). C<sub>14</sub>H<sub>10</sub>N<sub>2</sub>O<sub>3</sub> requires 255.2530.

Synthesis of (E)-1-(pyridin-2-yl)-3-(3,4,5-trimethoxyphenyl)prop-2-en-1-one (**C9**)

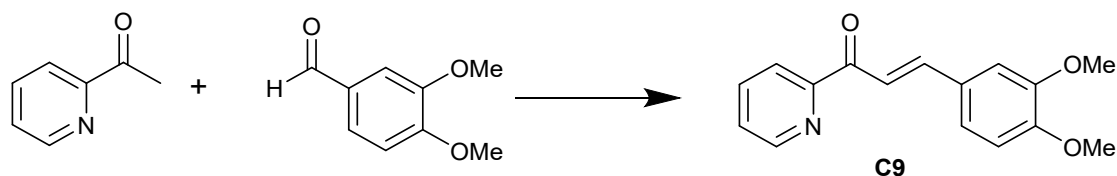

**Yield** 0.52g (38%);

**Vmax** (Solid)/cm<sup>-1</sup> 1581, 1448, 1026 and 791;

**<sup>1</sup>H NMR** δ<sub>H</sub> (400 MHz; CDCl<sub>3</sub>) 3.96 (3 H, s, CH<sub>3</sub>), 4.00 (3 H, s, CH<sub>3</sub>), 6.91-6.94 (2 H, m, CH), 7.28-7.34 (2 H, m, CH), 7.50-7.53 (1 H, m, CH), 7.88-7.96 (2 H, m, CH), 8.15-8.23 (2 H, m, CH), 8.77-8.78 (1 H, m, CH);

**<sup>13</sup>C NMR** δ<sub>C</sub> (400 MHz; CDCl<sub>3</sub>) 56.0, 56.1, 110.2, 111.0, 118.6, 123.0, 124.0, 126.8, 128.2, 137.1, 145.1, 148.8, 149.2, 151.6, 154.5 and 189.3;

**HRMS m/z (qToF)** Found 270.3051 (M+H<sup>+</sup>). C<sub>16</sub>H<sub>14</sub>NO<sub>2</sub> requires 270.3080.

Synthesis of 2-(1-methyl-5-phenyl-1H-pyrazol-3-yl)pyridine (**P1**)

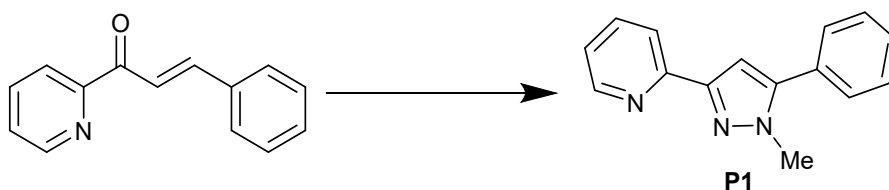

**Yield** 0.137g (57%);

**Vmax** (Film)/cm<sup>-1</sup> 1691, 1671, 1581, 1326 and 743;

**<sup>1</sup>H NMR** δ<sub>H</sub> (400 MHz; CDCl<sub>3</sub>) 4.29 (3 H, s, CH<sub>3</sub>), 6.90 (1 H, s, CH), 7.27-7.28 (1 H, m, CH), 7.30-7.32 (1 H, m, CH), 7.33-7.42 (2 H, m, CH), 7.44-7.45 (1 H, m, CH), 7.65-7.67 (1 H, m, CH), 7.77-7.88 (2 H, m, CH) and 8.71-8.73 (1 H, m, CH);

**<sup>13</sup>C NMR** δ<sub>C</sub> (400 MHz; CDCl<sub>3</sub>) 39.5, 103.5, 122.5, 128.9, 125.6, 127.6, 128.6, 133.3, 136.8, 142.7, 149.3, 149.9, 150.0;

**HRMS m/z (qToF)** Found 236.2958 (M+H<sup>+</sup>). C<sub>15</sub>H<sub>13</sub>N<sub>3</sub> requires 236.2980.

Synthesis of 2-(5-(4-fluorophenyl)-1-methyl-1H-pyrazol-3-yl)pyridine (**P2**)

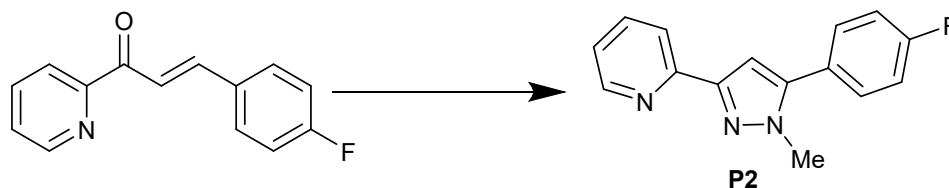

**Yield** 0.194g (77%);

**Vmax** (Film)/cm<sup>-1</sup> 1630, 1480, 1282 and 1042;

**<sup>1</sup>H NMR** δ<sub>H</sub> (400 MHz; CDCl<sub>3</sub>) 4.29 (3 H, s, CH<sub>3</sub>), 6.84 (1 H, s, CH), 7.08-7.14 (2 H, m, CH), 7.26-7.29 (1 H, m, CH), 7.43-7.47 (1 H, m, CH), 7.64-7.66 (1 H, m, CH), 7.80-7.84 (3 H, m, CH) and 8.71-8.73 (1 H, m, CH);

**<sup>13</sup>C NMR** δ<sub>C</sub> (400 MHz; CDCl<sub>3</sub>) 39.4, 103.0, 115.4, 115.6, 122.5, 122.8, 127.1, 127.2, 129.0, 130.0, 136.8, 142.9, 149.3, 149.8, 161.3 and 163.8;

**HRMS m/z (qToF)** Found 254.2954 (M+H<sup>+</sup>). C<sub>15</sub>H<sub>2</sub>FN<sub>3</sub> requires 254.2884.

Synthesis of 2-(5-(4-chlorophenyl)-1-methyl-1H-pyrazol-3-yl)pyridine (**P3**)

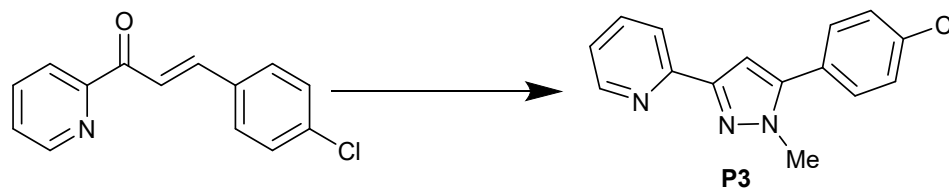

**Yield** 0.149g (61%);

**Vmax** (Film)/cm<sup>-1</sup> 1629, 1479, 1282 and 1010;

**<sup>1</sup>H NMR** δ<sub>H</sub> (400 MHz; CDCl<sub>3</sub>) 4.28 (3 H, s, CH<sub>3</sub>), 6.87 (1 H, s, CH), 7.28-7.31 (1 H, m, CH), 7.31-7.41 (2 H, m, CH), 7.64-7.66 (1 H, m, CH), 7.78-7.81 (3 H, m, CH) and 8.71-8.73 (1 H, m, CH);

**<sup>13</sup>C NMR** δ<sub>C</sub> (400 MHz; CDCl<sub>3</sub>) 39.5, 103.5, 120.5, 122.6, 122.8, 126.8, 128.8, 131.8, 133.3, 136.8, 143.0, 149.0 and 149.7;

**HRMS m/z (qToF)** Found 270.7455 (M+H<sup>+</sup>). C<sub>15</sub>H<sub>12</sub>ClN<sub>3</sub> requires 270.7400.



Synthesis of 2-(5-(4-bromophenyl)-1-methyl-1H-pyrazol-3-yl)pyridine (**P4**)

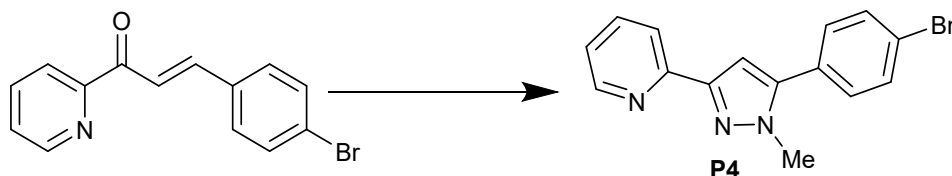

**Yield** 0.125g (40%);

**Vmax** (Film)/cm<sup>-1</sup> 1630, 1536, 1282 and 1020;

**<sup>1</sup>H NMR** δ<sub>H</sub> (400 MHz; CDCl<sub>3</sub>) 4.27 (3 H, s, CH<sub>3</sub>), 6.87 (1 H, s, CH), 7.25-7.31 (2 H, m, CH), 7.49-7.51 (1 H, m, CH), 7.54-7.56 (2 H, m, CH), 7.62-7.63 (1 H, m, CH), 7.64-7.77 (2 H, m, CH), 7.79-7.81 (1 H, m, CH) and 8.71-8.72 (1 H, m, CH);

**<sup>13</sup>C NMR** δ<sub>C</sub> (400 MHz; CDCl<sub>3</sub>) 39.5, 103.5, 121.5, 122.6, 122.9, 127.1, 128.6, 131.6, 131.2, 132.3, 136.8, 142.9 and 149.3;

**HRMS m/z (qToF)** Found 315.2010 (M+H<sup>+</sup>). C<sub>15</sub>H<sub>12</sub>BrN<sub>3</sub> requires 315.1940.

Synthesis of 2-(5-(4-iodophenyl)-1-methyl-1H-pyrazol-3-yl)pyridine (**P5**)

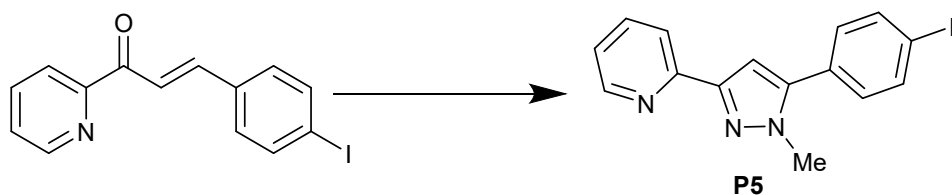

**Yield** 0.117g (32%);

**Vmax** (Film)/cm<sup>-1</sup> 1628, 1576, 1282 and 1007;

**<sup>1</sup>H NMR** δ<sub>H</sub> (400 MHz; CDCl<sub>3</sub>) 4.28 (3 H, s, CH<sub>3</sub>), 6.87 (1 H, s, CH), 7.60-7.65 (3 H, m, CH), 7.72-7.80 (4 H, m, CH) and 8.71-8.73 (1 H, m, CH);

**<sup>13</sup>C NMR** δ<sub>C</sub> (400 MHz; CDCl<sub>3</sub>) 39.5, 103.5, 122.6, 122.9, 127.2, 129.4, 130.3, 132.9, 136.8, 137.6, 137.7, 137.8, 142.9 and 149.3;

**HRMS m/z (qToF)** Found 362.1996 (M+H<sup>+</sup>). C<sub>15</sub>H<sub>12</sub>I<sub>N</sub><sub>3</sub> requires 362.1945.

Synthesis of 4-(1-methyl-3-(pyridin-2-yl)-1H-pyrazol-5-yl)benzonitrile (**P6**)

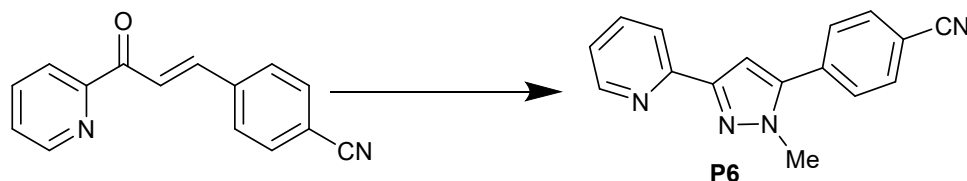

**Yield** 0.148g (57%);

**Vmax** (Film)/cm<sup>-1</sup> 1630, 1479, 1226 and 1001;

**<sup>1</sup>H NMR** δ<sub>H</sub> (400 MHz; CDCl<sub>3</sub>) 4.30 (3 H, s, CH<sub>3</sub>), 6.94 (1 H, s, CH), 7.30-7.33 (1 H, m, CH), 7.64-7.67 (1 H, m, CH), 7.69-7.72 (2 H, m, CH), 7.80-7.83 (1 H, m, CH), 7.94-7.97 (2 H, m, CH) and 8.71-8.73 (1 H, m, CH);

**<sup>13</sup>C NMR** δ<sub>C</sub> (400 MHz; CDCl<sub>3</sub>) 39.8, 104.1, 110.8, 119.1, 122.8, 122.9, 125.8, 128.1, 129.2, 132.6, 136.9, 137.7, 143.3 and 148.0;

**HRMS m/z (qToF)** Found 261.3015 (M+H<sup>+</sup>). C<sub>16</sub>H<sub>12</sub>N<sub>4</sub> requires 261.3080.

Synthesis of 2-(1-methyl-5-(4-nitrophenyl)-1H-pyrazol-3-yl)pyridine (**P7**)

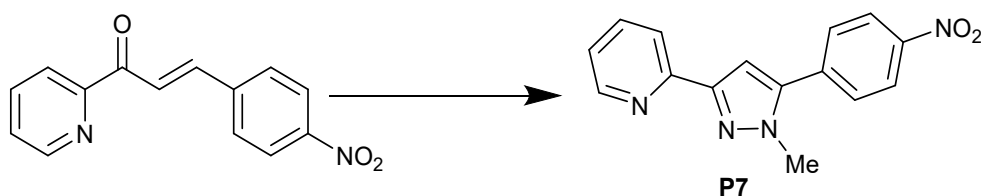

**Yield** 0.131g (47%);

**Vmax** (Film)/cm<sup>-1</sup> 1625, 1432, 1223 and 1012;

**<sup>1</sup>H NMR** δ<sub>H</sub> (400 MHz; CDCl<sub>3</sub>) 3.98 (3 H, s, CH<sub>3</sub>), 6.53-6.57 (1 H, m, CH), 6.63-6.67 (1 H, m, CH), 6.73 (1 H, s, CH), 7.42-7.50 (1 H, m, CH), 7.70-7.73 (2 H, m, CH) and 8.28-8.33 (3 H, m, CH);

**<sup>13</sup>C NMR** δ<sub>C</sub> (400 MHz; CDCl<sub>3</sub>) 58.9, 101.5, 112.7, 113.0, 116.0, 117.6, 118.7, 121.1, 123.4, 124.7, 126.3, 138.7 and 140.3

**HRMS m/z (qToF)** Found 281.2916 (M+H<sup>+</sup>). C<sub>15</sub>H<sub>12</sub>N<sub>4</sub>O<sub>2</sub> requires 281.2950.

Synthesis of 2-(5-(4-methoxyphenyl)-1-methyl-1H-pyrazol-3-yl)pyridine (**P8**)

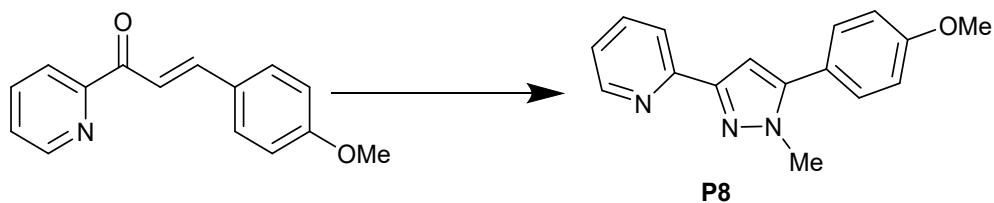

**Yield** 0.128g (48%);

**Vmax** (Film)/cm<sup>-1</sup> 1628, 1536, 1226 and 1053;

**<sup>1</sup>H NMR** δ<sub>H</sub> (400 MHz; CDCl<sub>3</sub>) 3.87 (3 H, s, CH<sub>3</sub>), 4.27 (3 H, s, CH<sub>3</sub>), 6.82 (1 H, s, CH), 6.96-6.98 (2 H, m, CH<sub>2</sub>), 7.27-7.29 (1 H, m, CH), 7.64-7.77 (1 H, m, CH), 7.77-7.81 (3 H, m, CH) and 8.71-8.72 (1 H, m, CH);

**<sup>13</sup>C NMR** δ<sub>c</sub> (400 MHz; CDCl<sub>3</sub>) 39.3, 55.3, 103.0, 114.0, 119.2, 122.4, 122.9, 125.5, 126.2, 126.7, 136.7, 149.3, 150.0 and 159.3;

**HRMS m/z (qToF)** Found 266.3191 (M+H<sup>+</sup>). C<sub>16</sub>H<sub>14</sub>NO<sub>2</sub> requires 266.3240.

Synthesis of 2-(5-(3,4-dimethoxyphenyl)-1-methyl-1H-pyrazol-3-yl)pyridine (**P9**)

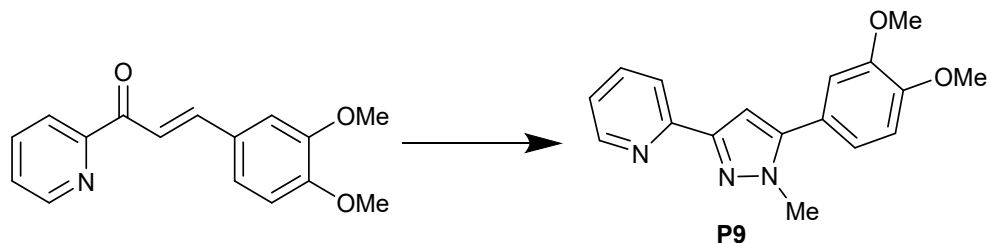

**Yield** 0.119g (38%);

**Vmax** (Film)/cm<sup>-1</sup> 1630, 1536, 1282 and 1001;

**<sup>1</sup>H NMR** δ<sub>H</sub> (400 MHz; CDCl<sub>3</sub>) 3.94, (3 H, s, CH<sub>3</sub>), 4.01 (3 H, s, CH<sub>3</sub>), 4.28 (3 H, s, CH<sub>3</sub>), 6.84 (1 H, s, CH), 6.93-6.45 (1 H, m, CH), 7.27-7.30 (2 H, m, CH), 7.36-7.38 (1 H, m, CH), 7.46-7.46 (1 H, m, CH), 7.65-7.67 (1 H, m, CH), 7.77-7.82 (1 H, m, CH) and 8.71-8.73 (1 H, m, CH);

**<sup>13</sup>C NMR** δ<sub>c</sub> (400 MHz; CDCl<sub>3</sub>) 39.4, 39.5, 103.2, 108.7, 111.2, 111.4, 118.1, 121.7, 122.4, 126.4, 126.8, 128.5, 129.2, 136.7, 148.8, 149.2 and 168.3;

**HRMS m/z (qToF)** Found 296.3423 (M+H<sup>+</sup>). C<sub>17</sub>H<sub>17</sub>N<sub>3</sub>O<sub>2</sub> requires 296.3500.

# NMR Spectra

## Synthesis of (E)-3-phenyl-1-(pyridin-2-yl)prop-2-en-1-one (C1)

4-H Chalcone  
PROTON16.CMDnp CDC13 {C:\Bruker\TopSpin3.6.5} nmrsu 94

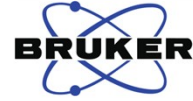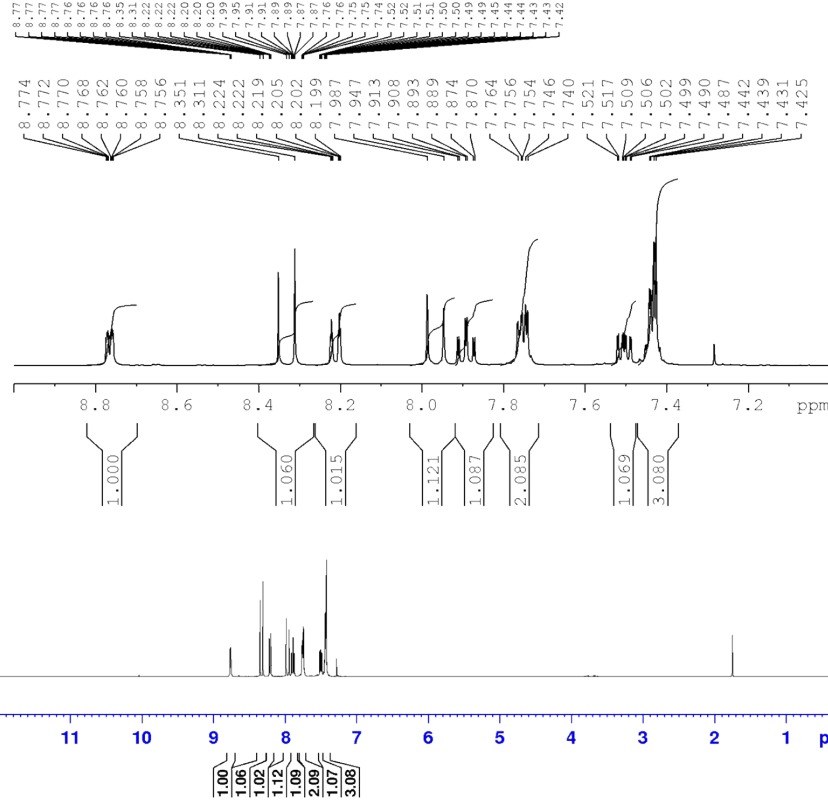

Current Data Parameters  
NAME Apr22-2024-Alex  
EXPNO 10  
PROCNO 1

F2 - Acquisition Parameters  
Date\_ 20240422  
Time 11:50 h  
INSTRUM av400  
PROBHD Z104450\_0135 ( )  
PULPROG zg30  
TD 65536  
SOLVENT CDC13  
NS 16  
DS 2  
SWH 6410.256 Hz  
FIDRES 0.195625 Hz  
AQ 5.1118078 sec  
RG 185.2  
DW 78.000 usec  
DE 6.50 usec  
TE 298.2 K  
D1 1.00000000 sec  
TD0 1  
SFO1 400.1324008 MHz  
NUC1 1H  
P0 5.00 usec  
P1 15.00 usec  
PLW1 11.20899963 W

F2 - Processing parameters  
SI 32768  
SF 400.1300000 MHz  
WDW EM  
SSB 0  
LB 0.30 Hz  
GB 0  
PC 1.00

4-H Chalcone  
C13CPD512.CMDnp CDC13 {C:\Bruker\TopSpin3.6.5} nmrsu 94

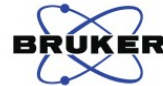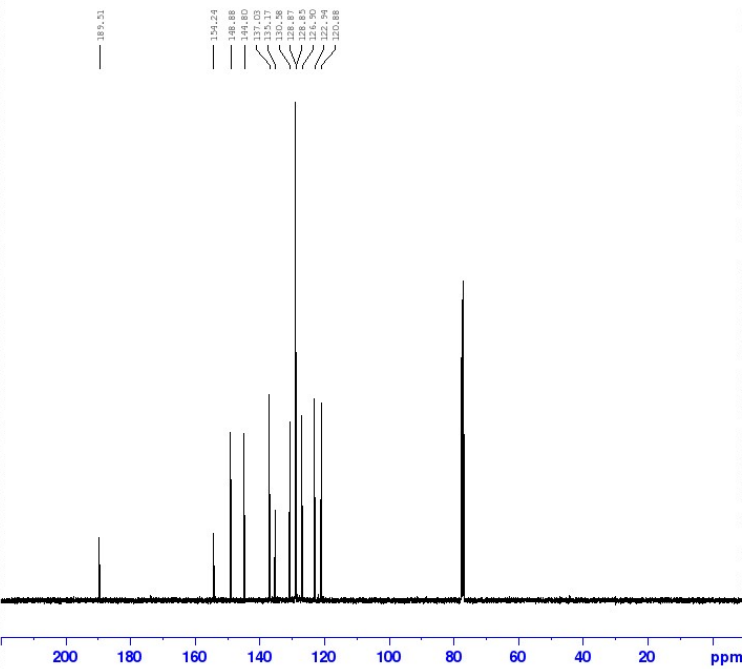

Current Data Parameters  
NAME Apr22-2024-Alex  
EXPNO 11  
PROCNO 1

F2 - Acquisition Parameters  
Date\_ 20240422  
Time 12:21 h  
INSTRUM av400  
PROBHD Z104450\_0135 ( )  
PULPROG zgpg30  
TD 65536  
SOLVENT CDC13  
NS 512  
DS 4  
SWH 23148.148 Hz  
FIDRES 0.706425 Hz  
AQ 1.4155777 sec  
RG 209.43  
DW 21.600 usec  
DE 6.50 usec  
TE 298.2 K  
D1 2.00000000 sec  
D11 0.03000000 sec  
TD0 1  
SFO1 100.6233329 MHz  
NUC1 13C  
P0 3.33 usec  
P1 10.00 usec  
PLM1 51.51900101 W  
SFO2 400.1316005 MHz  
NUC2 1H  
CPDPRG12 waltz16  
PCPD2 90.00 usec  
PLM2 11.20899963 W  
PLM12 0.31135999 W  
PLM13 0.15662000 W

F2 - Processing parameters  
SI 32768  
SF 100.6127685 MHz  
WDW EM  
SSB 0  
LB 1.00 Hz  
GB 0  
PC 1.40



# Synthesis of (E)-3-(4-chlorophenyl)-1-(pyridin-2-yl)prop-2-en-1-one (C3)

4-Cl Chalcone

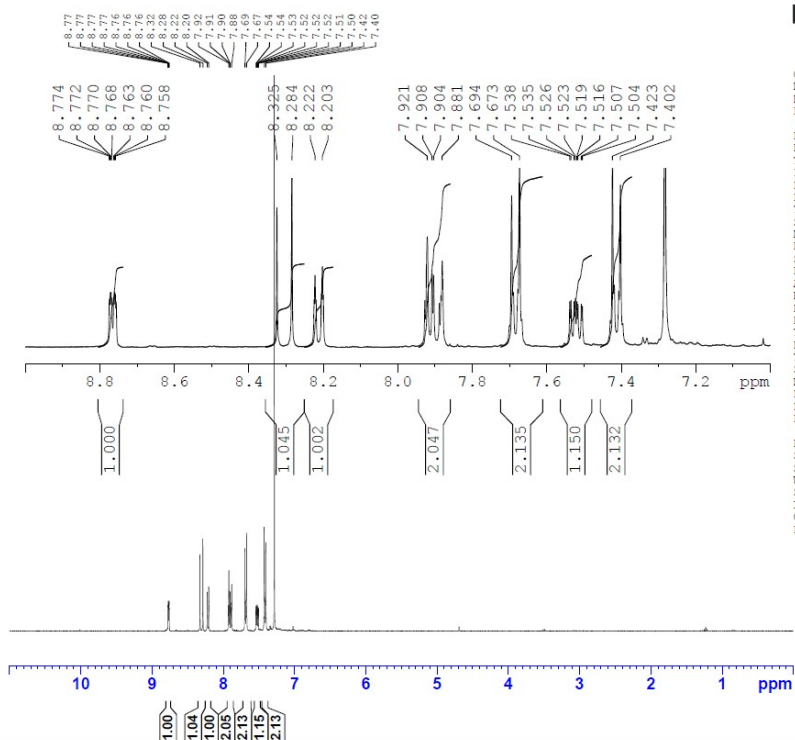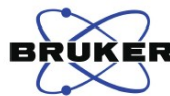

Current Data Parameters  
 NAME Apr09-2024-Alex  
 EXPNO 30  
 PROCNO 1

F2 - Acquisition Parameters  
 Date\_ 20240409  
 Time\_ 12.07 h  
 INSTRUM av400  
 PROBHD 2104450\_0135 ( )  
 PULPROG zgpg30  
 TD 65536  
 ID 65536  
 SOLVENT CDCl3  
 NS 16  
 DS 2  
 SWH 6410.256 Hz  
 FIDRES 0.195625 Hz  
 AQ 5.1118078 sec  
 RG 209.43  
 DW 78.000 usec  
 DE 6.50 usec  
 TE 298.2 K  
 D1 1.00000000 sec  
 TD0 1  
 SFO1 400.1324008 MHz  
 NUC1 1H  
 P0 5.00 usec  
 P1 15.00 usec  
 PLW1 11.20889963 W

F2 - Processing parameters  
 SI 32768  
 SF 400.1300000 MHz  
 WDW EM  
 SSB 0  
 LB 0.30 Hz  
 GB 0  
 PC 1.00

4-Cl Chalcone Carbon  
 C13CPD512.CMDnp CDC13 (C:\Bruker\TopSpin3.6.5) nmr su 92

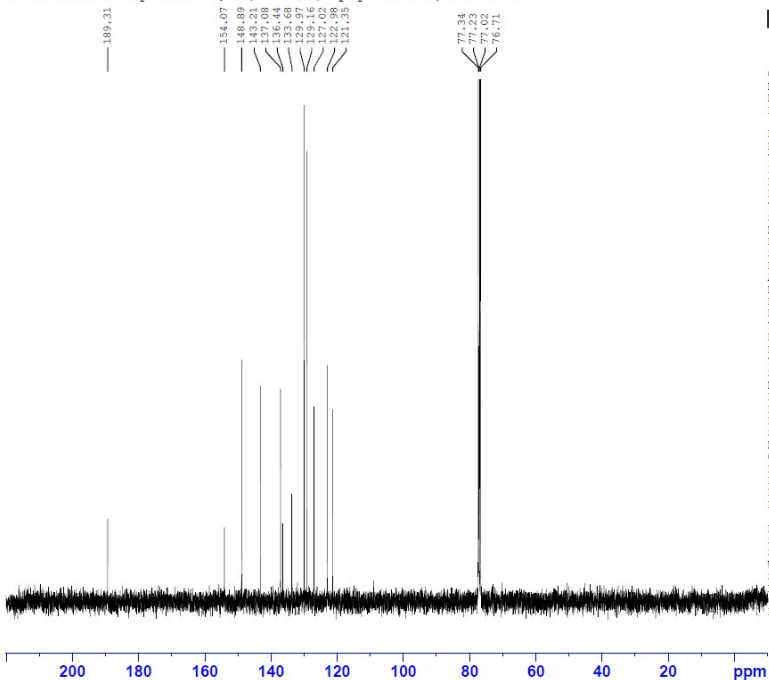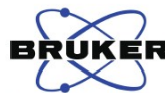

Current Data Parameters  
 NAME Apr09-2024-Alex  
 EXPNO 40  
 PROCNO 1

F2 - Acquisition Parameters  
 Date\_ 20240409  
 Time\_ 14.49 h  
 INSTRUM av400  
 PROBHD 2104450\_0135 ( )  
 PULPROG zgpg30  
 TD 65536  
 ID 65536  
 SOLVENT CDCl3  
 NS 512  
 DS 4  
 SWH 23148.148 Hz  
 FIDRES 0.706425 Hz  
 AQ 1.4155777 sec  
 RG 209.43  
 DW 21.600 usec  
 DE 6.50 usec  
 TE 298.2 K  
 D1 2.00000000 sec  
 D11 0.03000000 sec  
 TD0 1  
 SFO1 100.6233329 MHz  
 NUC1 13C  
 P0 3.33 usec  
 P1 10.00 usec  
 PLW1 51.51900101 W  
 SFO2 400.1316005 MHz  
 NUC2 1H  
 CPDPRG2 waltz16  
 FCPD2 90.00 usec  
 PLW2 11.20889963 W  
 PLW12 0.31136999 W  
 PLW13 0.15662000 W

F2 - Processing parameters  
 SI 32768  
 SF 100.6127685 MHz  
 WDW EM  
 SSB 0  
 LB 1.00 Hz  
 GB 0  
 PC 1.40

# Synthesis of (E)-3-(4-bromophenyl)-1-(pyridin-2-yl)prop-2-en-1-one (C4)

4-Br Chalcone

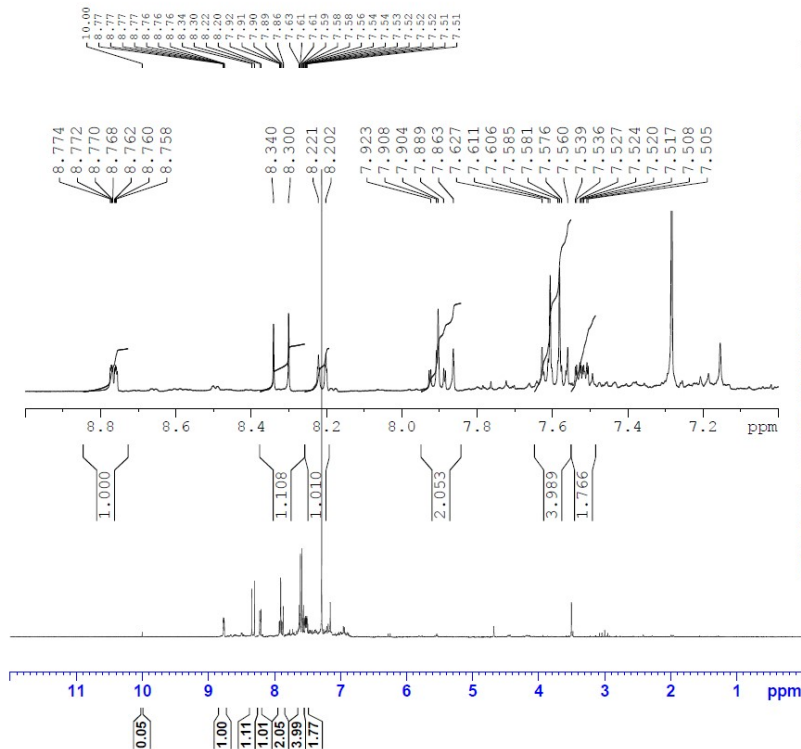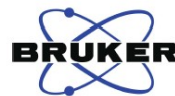

Current Data Parameters  
 NAME Apr09-2024-Alex  
 EXNO 50  
 PROCNO 1

F2 - Acquisition Parameters  
 Date\_ 20240409  
 Time\_ 15:40 h  
 INSTRUM av400  
 PROBHD Z104450\_0135 ( )  
 PULPROG zg30  
 TD 65536  
 SOLVENT CDCl3  
 NS 16  
 DS 2  
 SWH 6410.256 Hz  
 FIDRES 0.195625 Hz  
 AQ 5.1118078 sec  
 RG 209.43  
 DW 78.000 usec  
 DE 6.50 usec  
 TE 298.2 K  
 D1 1.00000000 sec  
 TDO 1  
 SFO1 400.1324008 MHz  
 NUC1 1H  
 P0 5.00 usec  
 F1 15.00 usec  
 PLW1 11.20899963 W

F2 - Processing parameters  
 SI 32768  
 SF 400.1300000 MHz  
 WDW EM  
 SSB 0  
 LB 0.30 Hz  
 GB 0  
 PC 1.00

9th April 4-Br Chalcone Carbon  
 C13CPD1024.CMDnp CDCl3 (C:\Bruker\TopSpin3.6.5) nmrsu 88

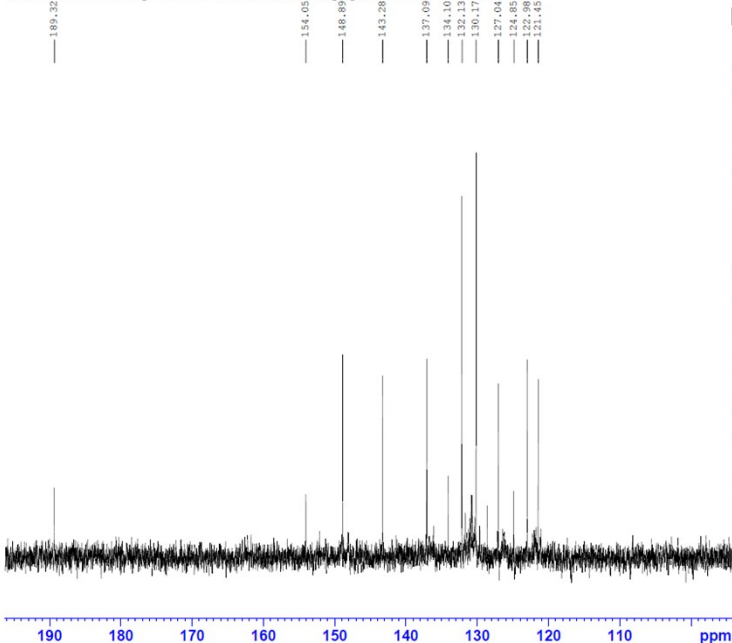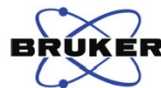

Current Data Parameters  
 NAME Apr09-2024-Alex  
 EXNO 70  
 PROCNO 1

F2 - Acquisition Parameters  
 Date\_ 20240410  
 Time\_ 5:33 h  
 INSTRUM av400  
 PROBHD Z104450\_0135 ( )  
 PULPROG zgpg30  
 TD 65536  
 SOLVENT CDCl3  
 NS 1024  
 DS 4  
 SWH 24038.461 Hz  
 FIDRES 0.733596 Hz  
 AQ 1.3631488 sec  
 RG 209.43  
 DW 20.600 usec  
 DE 6.50 usec  
 TE 298.2 K  
 D1 2.00000000 sec  
 D11 0.03000000 sec  
 TDO 1  
 SFO1 100.6228260 MHz  
 NUC1 13C  
 P0 3.33 usec  
 F1 10.00 usec  
 PLW1 51.91900101 W  
 SFO2 400.1316005 MHz  
 NUC2 1H  
 CPDPRG[2] waltz16  
 FPP2 80.00 usec  
 PLW2 11.20899963 W  
 PLW12 0.31136999 W  
 PLW13 0.18662000 W

F2 - Processing parameters  
 SI 32768  
 SF 100.6127659 MHz  
 WDW EM  
 SSB 0  
 LB 1.00 Hz  
 GB 0  
 PC 1.40

# Synthesis of (E)-3-(4-iodophenyl)-1-(pyridin-2-yl)prop-2-en-1-one (C5)

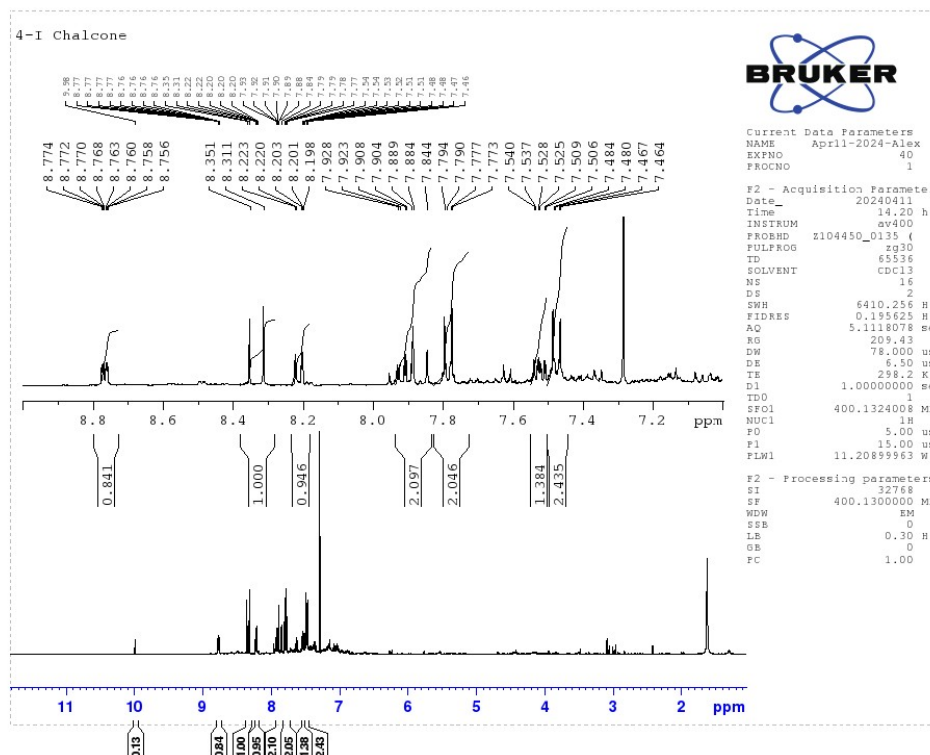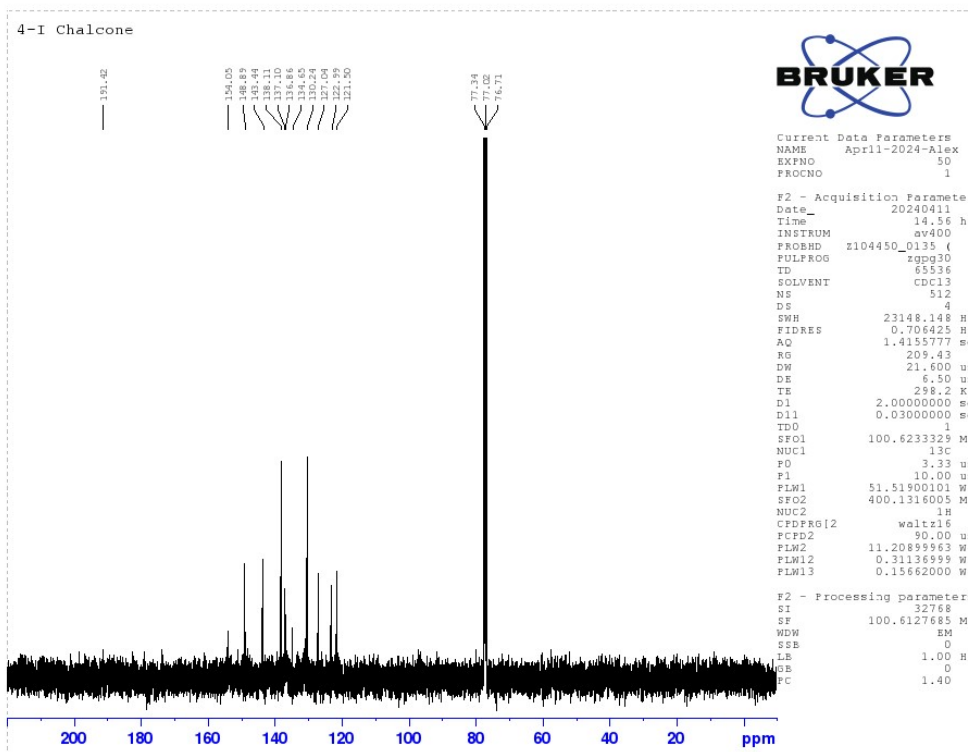



# Synthesis of (E)-3-(4-methoxyphenyl)-1-(pyridin-2-yl)prop-2-en-1-one (C6)

4-Ome Chalcone

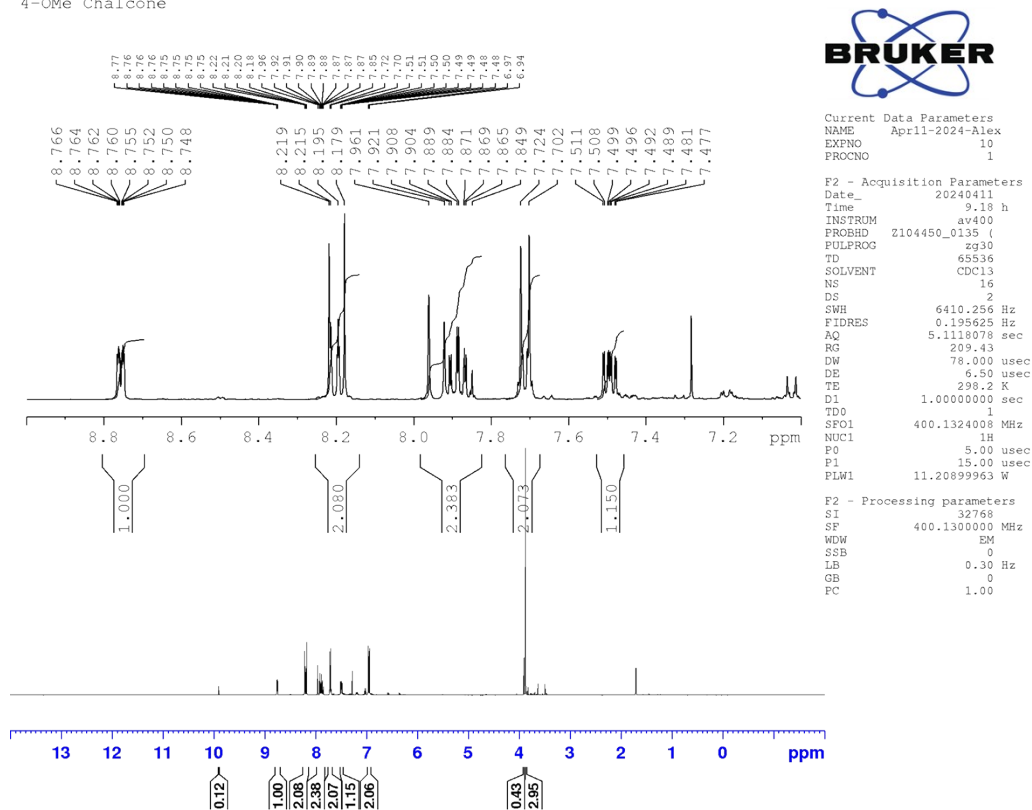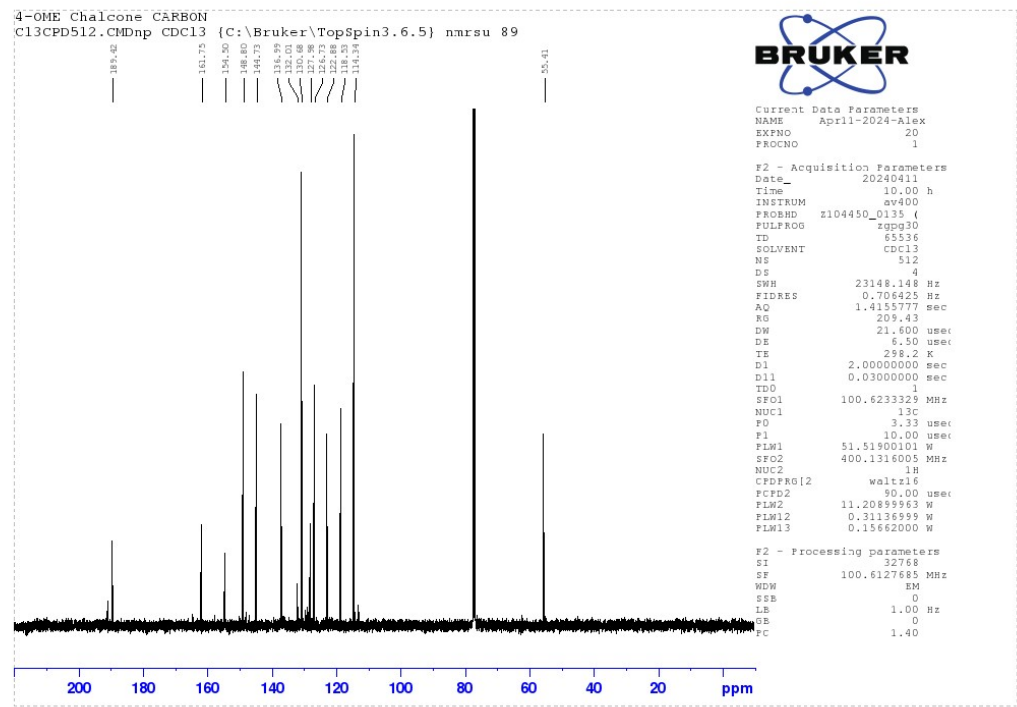

# Synthesis of (E)-4-(3-oxo-3-(pyridin-2-yl)prop-1-en-1-yl)benzonitrile (C7)

Chalcone CN

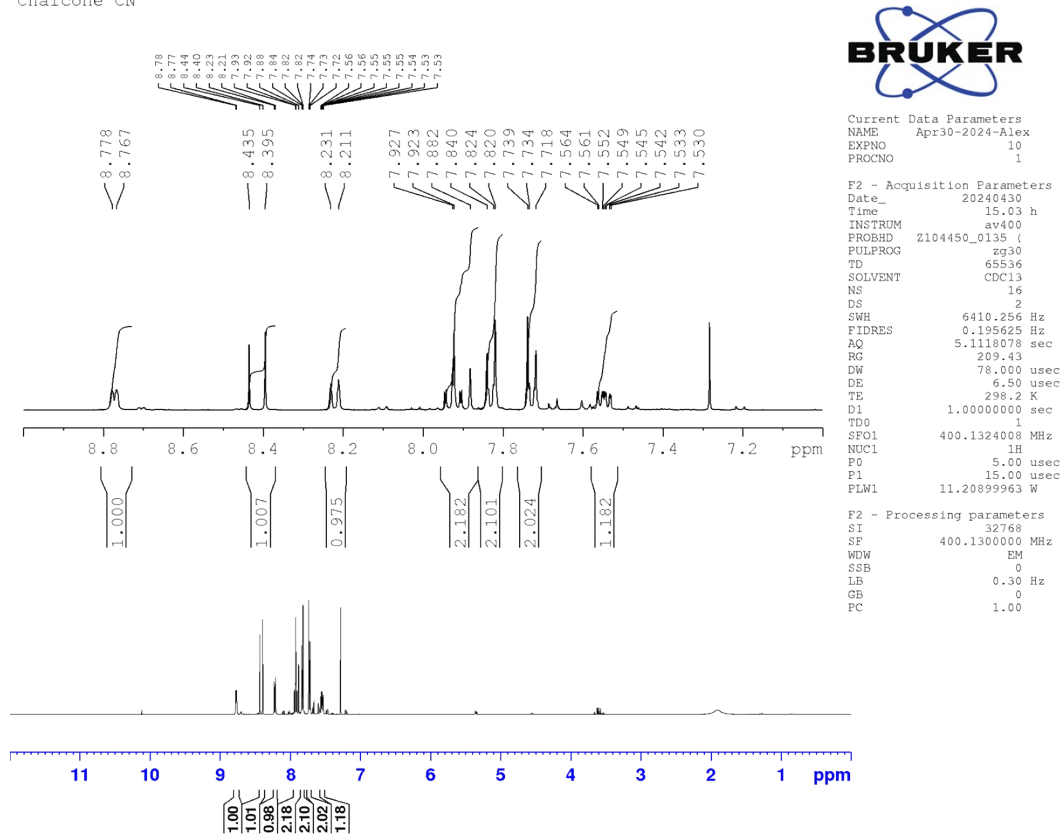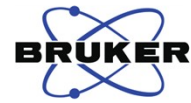

**Current Data Parameters**

NAME Apr30-2024-Alex  
 EXPNO 10  
 PROCNO 1

**F2 - Acquisition Parameters**

Date\_ 20240430  
 Time 15.03 h  
 INSTRUM av400  
 PROBHD 2104450\_0135 (zg30)  
 PULPROG zg30  
 TD 65536  
 SOLVENT CDC13  
 NS 16  
 DS 2  
 SWH 6410.256 Hz  
 FIDRES 0.195625 Hz  
 AQ 5.1118078 sec  
 RG 209.43  
 DW 78.000 usec  
 DE 6.50 usec  
 TE 298.2 K  
 D1 1.0000000 sec  
 TDO 1  
 SFO1 400.1324008 MHz  
 NUC1 1H  
 P0 5.00 usec  
 P1 15.00 usec  
 PLW1 11.20899963 W

**F2 - Processing parameters**

SI 32768  
 SF 400.1300000 MHz  
 WDW EM  
 SSB 0  
 LB 0.50 Hz  
 GB 0  
 PC 1.00

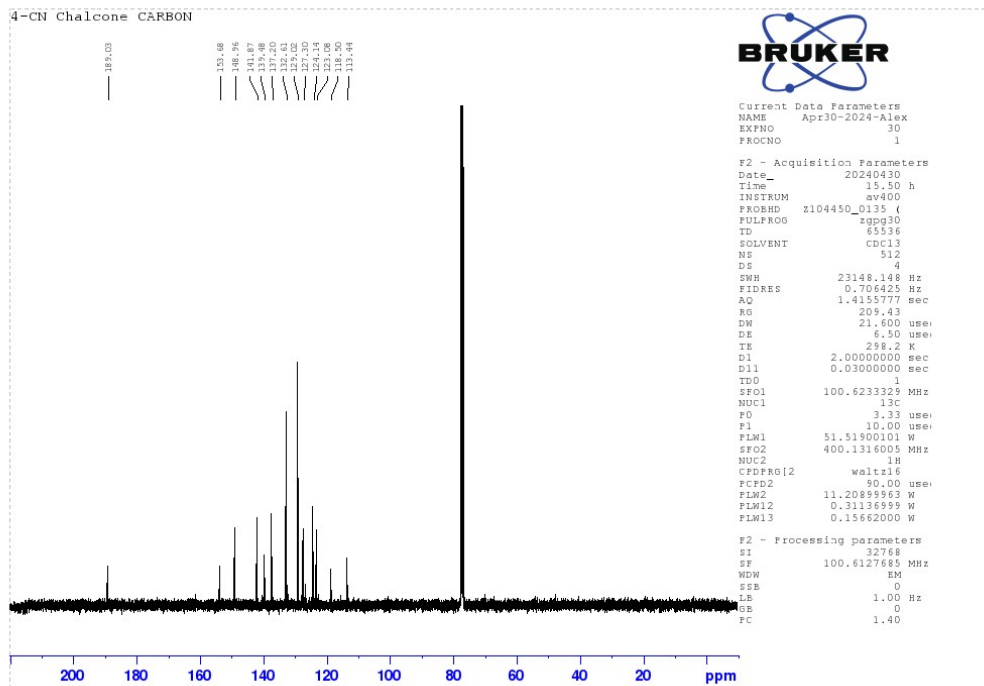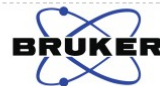

**Current Data Parameters**

NAME Apr30-2024-Alex  
 EXPNO 30  
 PROCNO 1

**F2 - Acquisition Parameters**

Date\_ 20240430  
 Time 15.50 h  
 INSTRUM av400  
 PROBHD 2104450\_0135 (zgpg30)  
 PULPROG zgpg30  
 TD 65536  
 SOLVENT cdcl3  
 NS 512  
 DS 4  
 SWH 23148.148 Hz  
 FIDRES 0.106425 Hz  
 AQ 1.4155777 sec  
 RG 209.43  
 DW 21.600 usec  
 DE 6.50 usec  
 TE 298.2 K  
 D1 2.0000000 sec  
 D11 0.0300000 sec  
 TDO 1  
 SFO1 100.6233329 MHz  
 NUC1 13C  
 P0 3.33 usec  
 P1 10.00 usec  
 PLW1 51.51900101 W  
 SFO2 400.1316005 MHz  
 NUC2 1H  
 CFDPFG[2] waltz16  
 FCD2 30.00 usec  
 PLW2 11.20899963 W  
 PLW12 0.31136999 W  
 PLW13 0.15662000 W

**F2 - Processing parameters**

SI 32768  
 SF 100.6127685 MHz  
 WDW EM  
 SSB 0  
 LB 1.00 Hz  
 GB 0  
 PC 1.40

# Synthesis of (E)-3-(4-nitrophenyl)-1-(pyridin-2-yl)prop-2-en-1-one (C8)

Chalcone N02

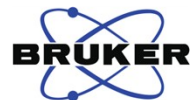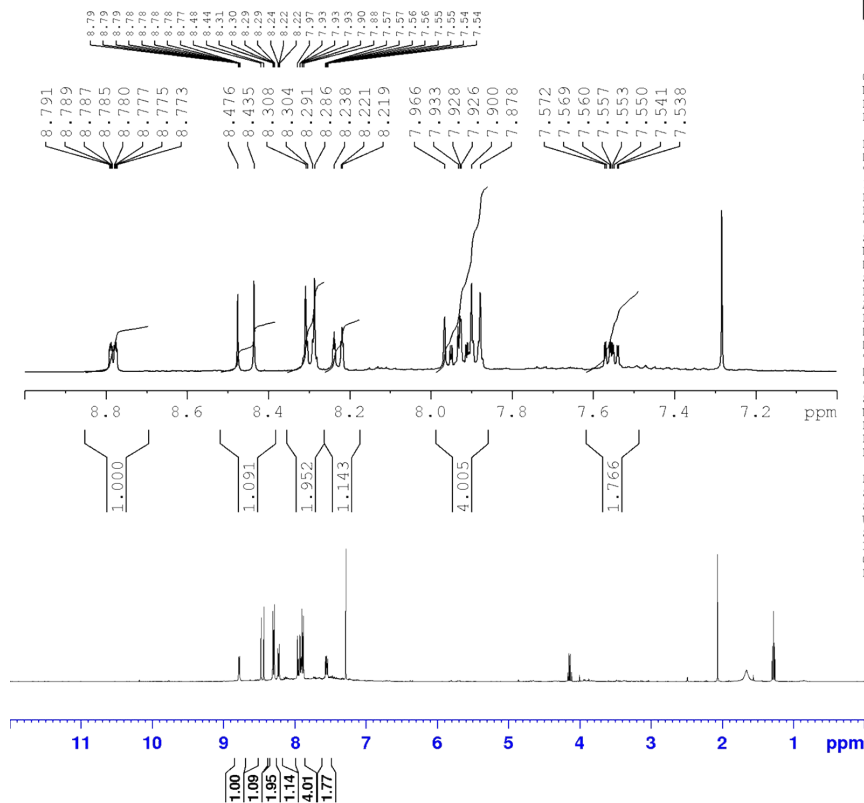

Current Data Parameters  
 NAME Apr30-2024-Alex  
 EXPNO 20  
 PROCNO 1

F2 - Acquisition Parameters  
 Date\_ 20240430  
 Time 15.09 h  
 INSTRUM av400  
 PROBHD z104450\_0135 ( )  
 PULPROG zg30  
 TD 65336  
 SOLVENT CDCl3  
 NS 16  
 DS 2  
 SWH 6410.256 Hz  
 FIDRES 0.195625 Hz  
 AQ 5.1118078 sec  
 RG 209.43  
 DW 78.000 usec  
 DE 6.50 usec  
 TE 298.2 K  
 D1 1.00000000 sec  
 TD0 1  
 SF01 400.1324008 MHz  
 NUC1 1H  
 P0 5.00 usec  
 P1 15.00 usec  
 PLW1 11.20899963 W

F2 - Processing parameters  
 SI 32768  
 SF 400.1300000 MHz  
 WDW EM  
 SSB 0  
 LB 0.30 Hz  
 GB 0  
 PC 1.00

4-N02 Chalcone CARBON

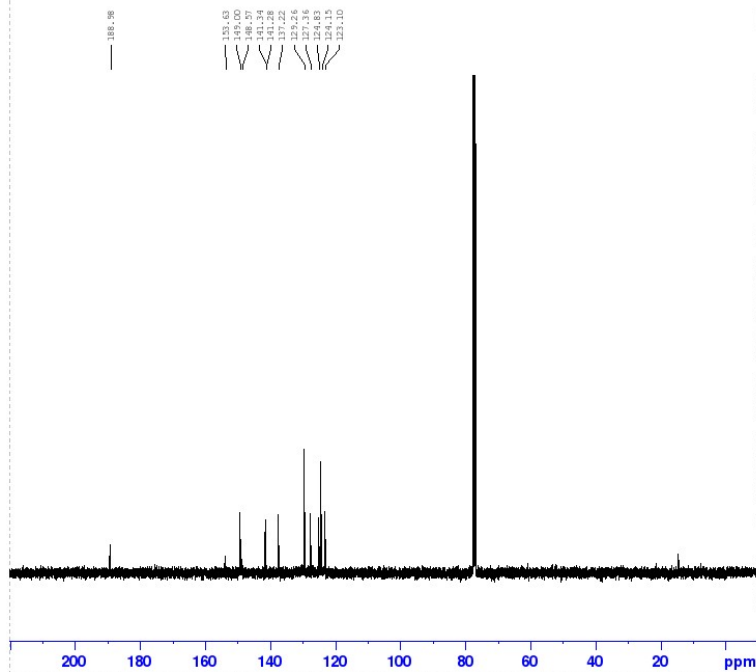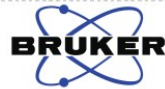

Current Data Parameters  
 NAME Apr30-2024-Alex  
 EXPNO 40  
 PROCNO 1

F2 - Acquisition Parameters  
 Date\_ 20240430  
 Time 16.30 h  
 INSTRUM av400  
 PROBHD z104450\_0135 ( )  
 PULPROG zgpg30  
 TD 65336  
 SOLVENT CDCl3  
 NS 512  
 DS 4  
 SWH 23148.148 Hz  
 FIDRES 0.706425 Hz  
 AQ 1.4155777 sec  
 RG 209.43  
 DW 21.600 usec  
 DE 6.50 usec  
 TE 298.2 K  
 D1 2.00000000 sec  
 D11 0.03000000 sec  
 TD0 1  
 SF01 100.6233329 MHz  
 NUC1 13C  
 P0 3.33 usec  
 P1 10.00 usec  
 PLW1 51.51900101 W  
 SF02 400.1316005 MHz  
 NUC2 1H  
 CDPFRG2 waltz16  
 FCFD2 90.00 usec  
 PLW2 11.20899963 W  
 PLW12 0.31136999 W  
 PLW13 0.15662000 W

F2 - Processing parameters  
 SI 32768  
 SF 100.6127685 MHz  
 WDW EM  
 SSB 0  
 LB 1.00 Hz  
 GB 0  
 PC 1.40

# Synthesis of (E)-1-(pyridin-2-yl)-3-(3,4,5-trimethoxyphenyl)prop-2-en-1-one (C9)

3,4 OMe Chalcone

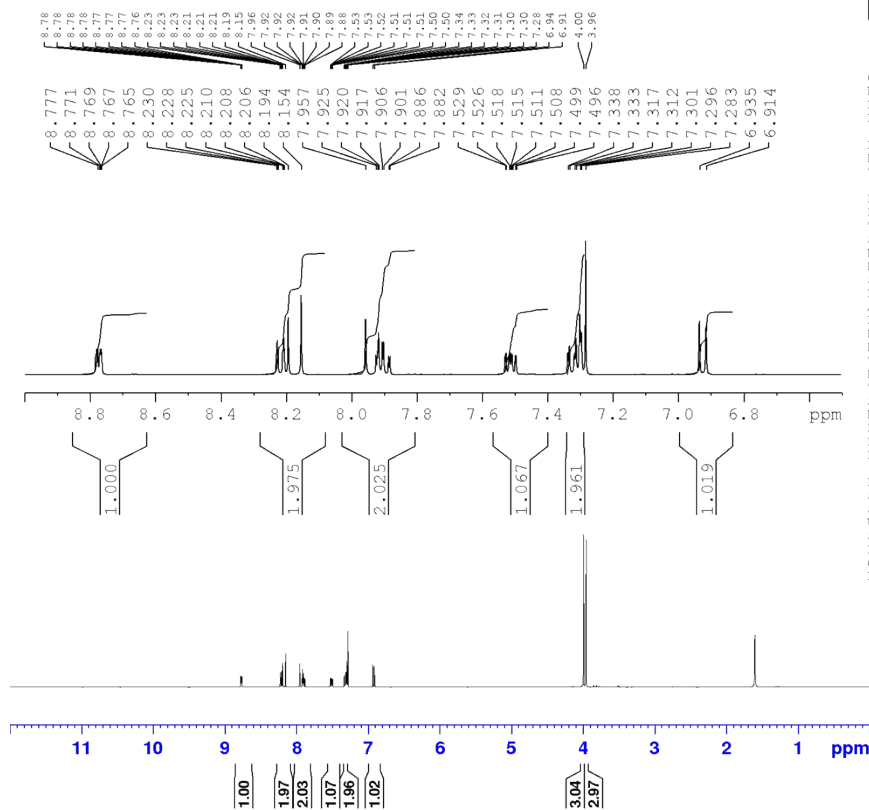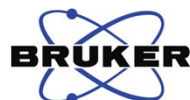

3,4 OMe Chalcone CARBON

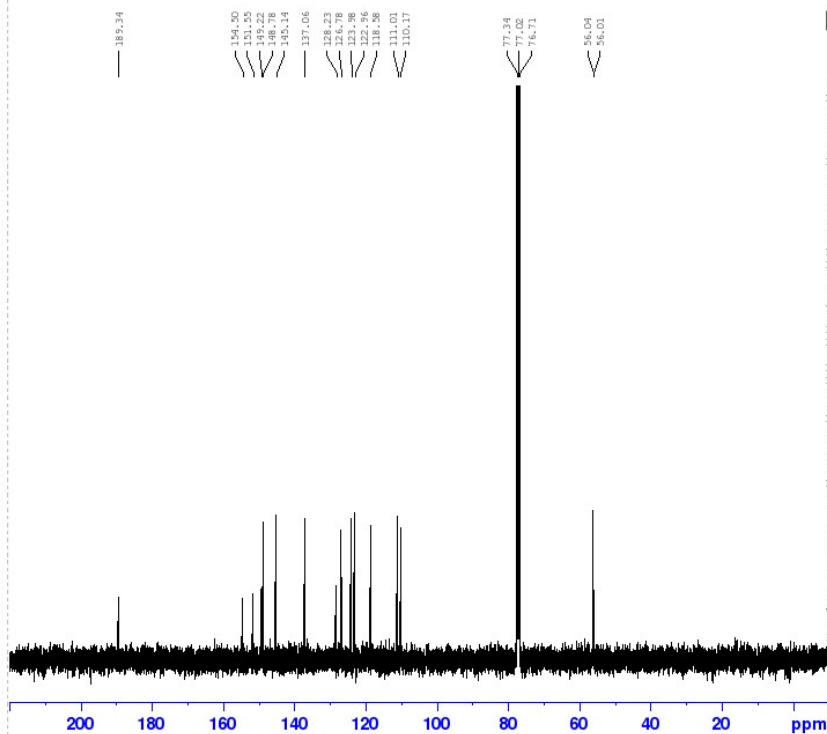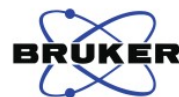

# Synthesis of 2-(1-methyl-5-phenyl-1H-pyrazol-3-yl)pyridine (P1)

4-H Pyrazole

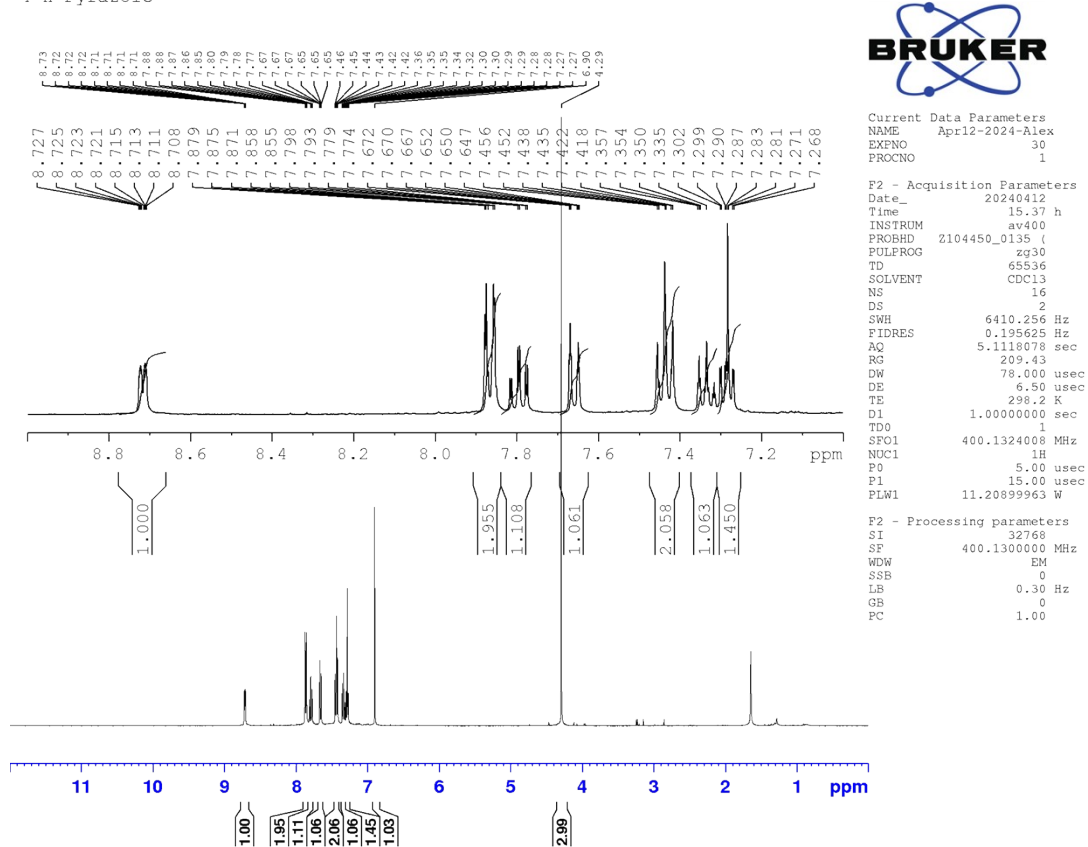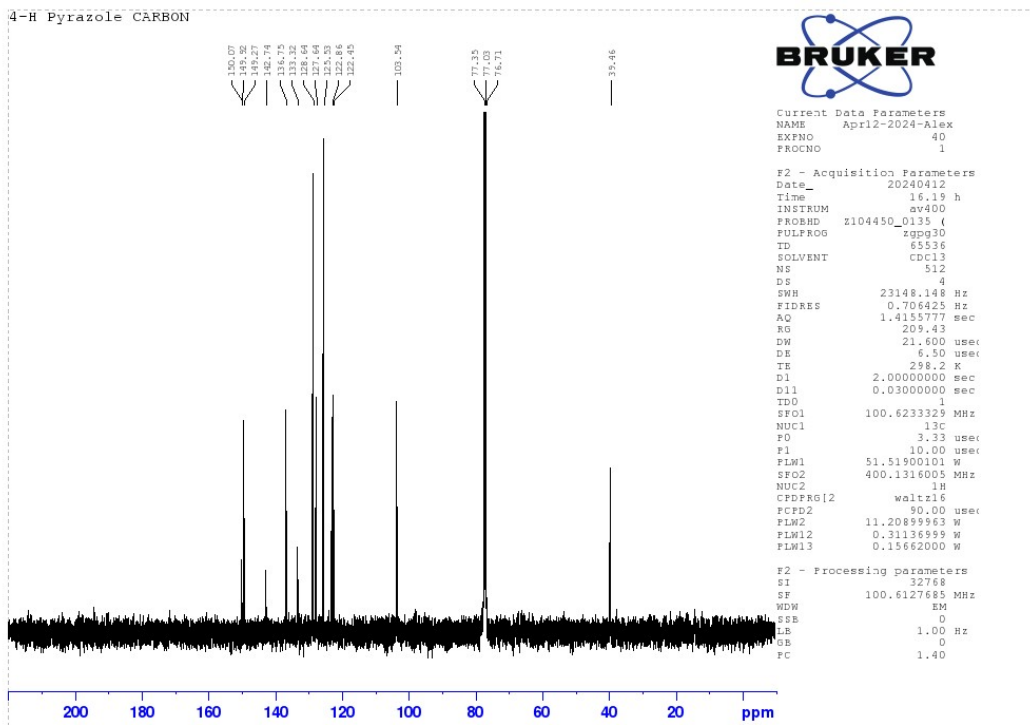

# Synthesis of 2-(5-(4-fluorophenyl)-1-methyl-1H-pyrazol-3-yl)pyridine (P2)

4-F Pyrazole CARBON

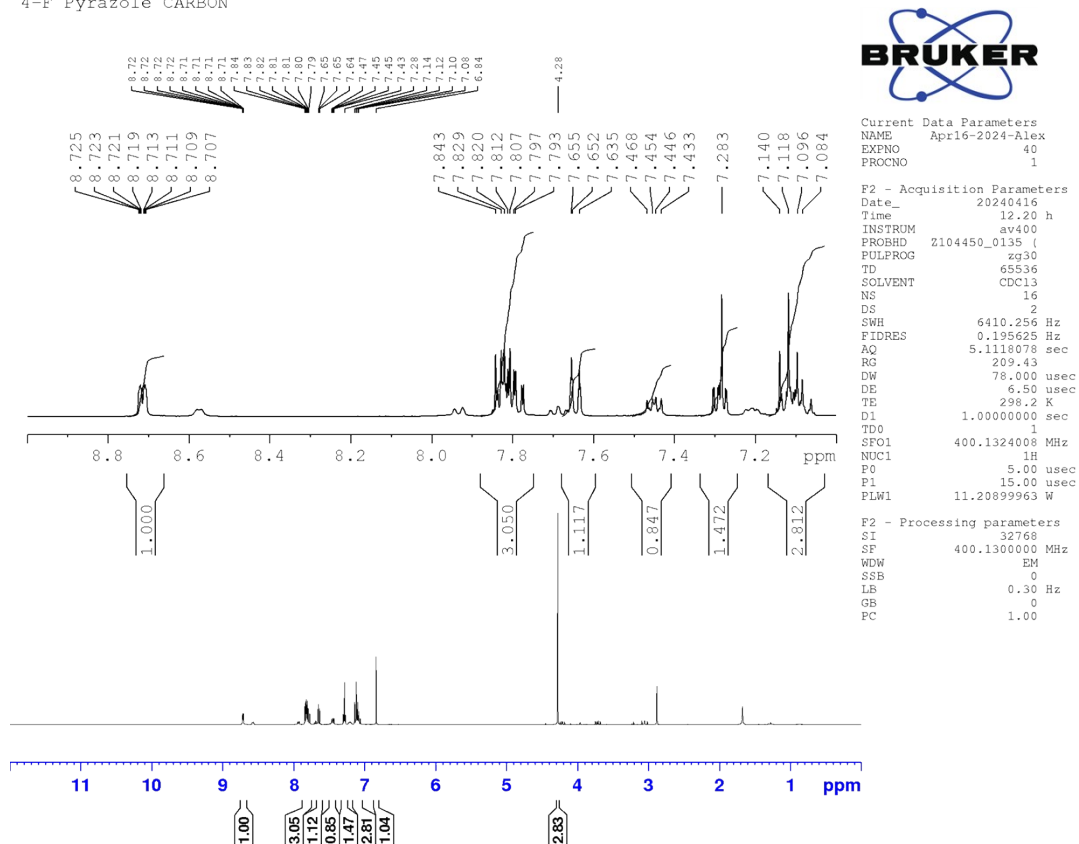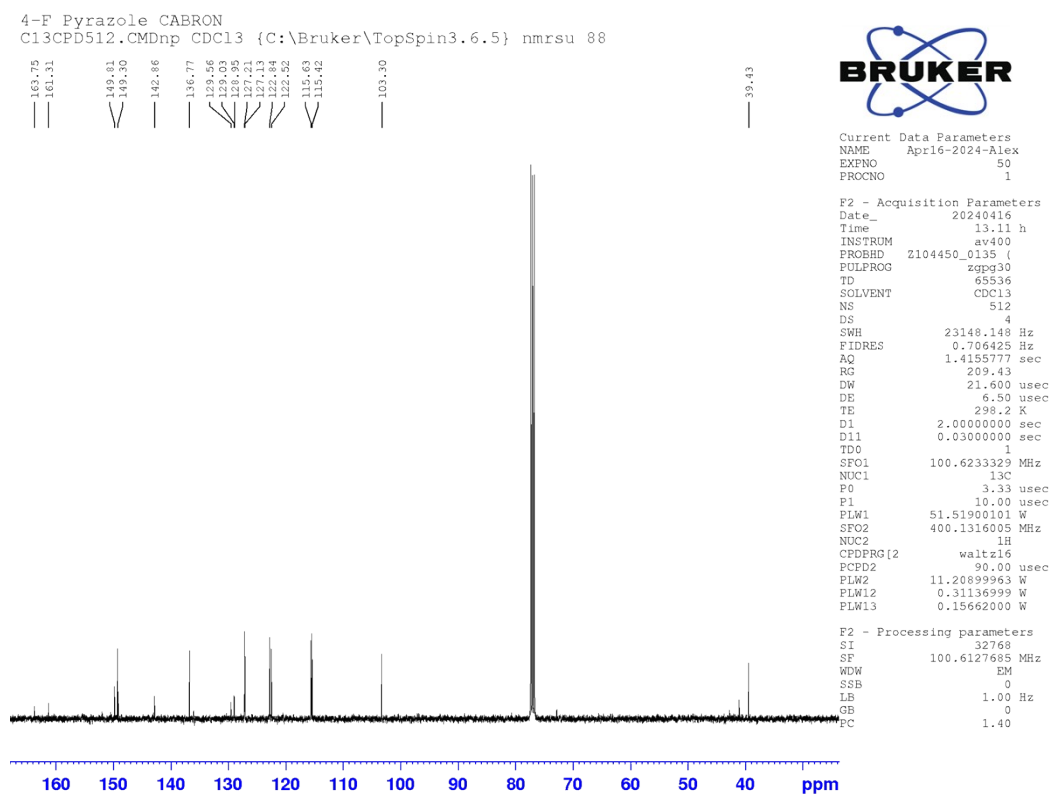

# Synthesis of 2-(5-(4-chlorophenyl)-1-methyl-1H-pyrazol-3-yl)pyridine (P3)

16th April 4-Cl Pyrazole Column  
 PROTON16.CMDnp CDC13 {C:\Bruker\TopSpin3.6.5} nmrsu 94

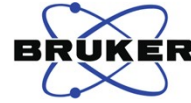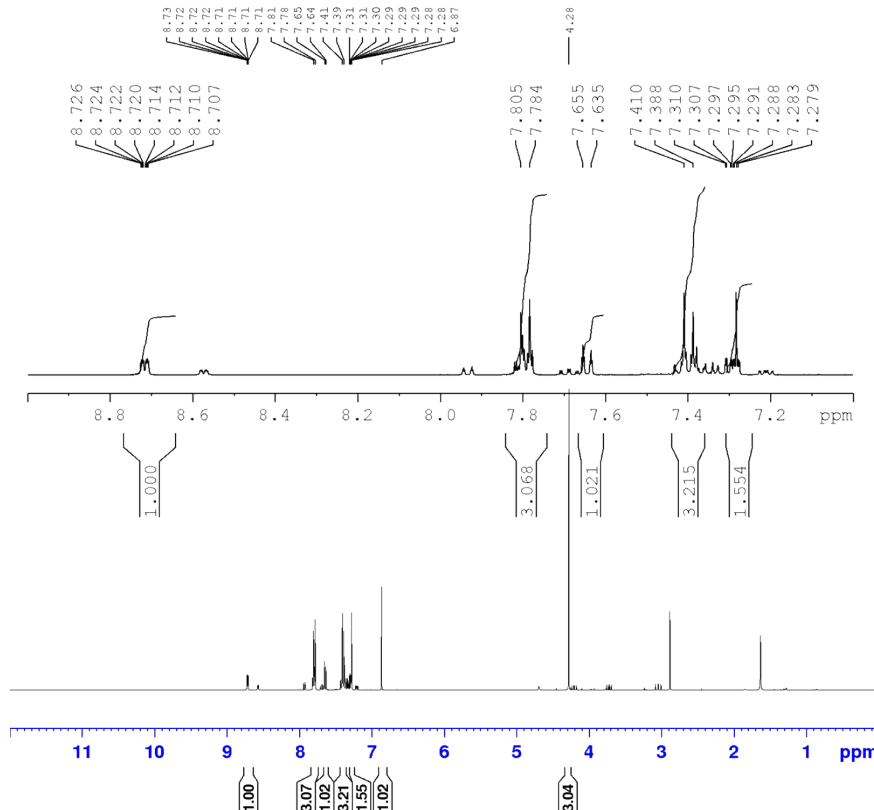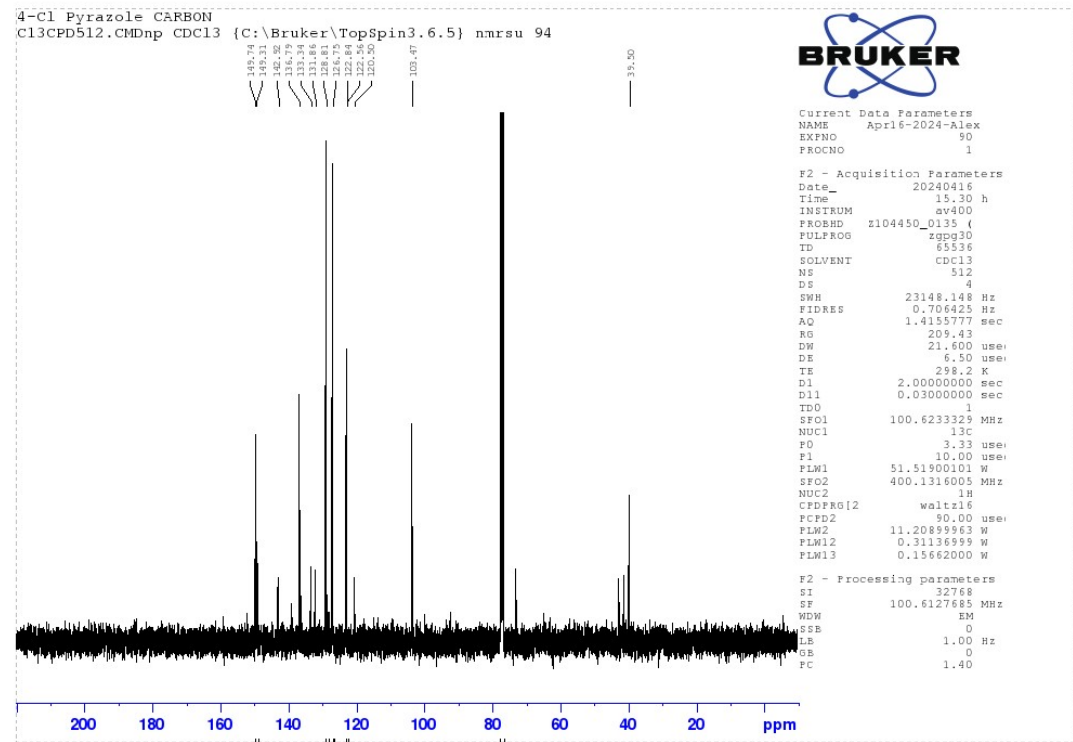

# Synthesis of 2-(5-(4-bromophenyl)-1-methyl-1H-pyrazol-3-yl)pyridine (P4)

4-Br Column

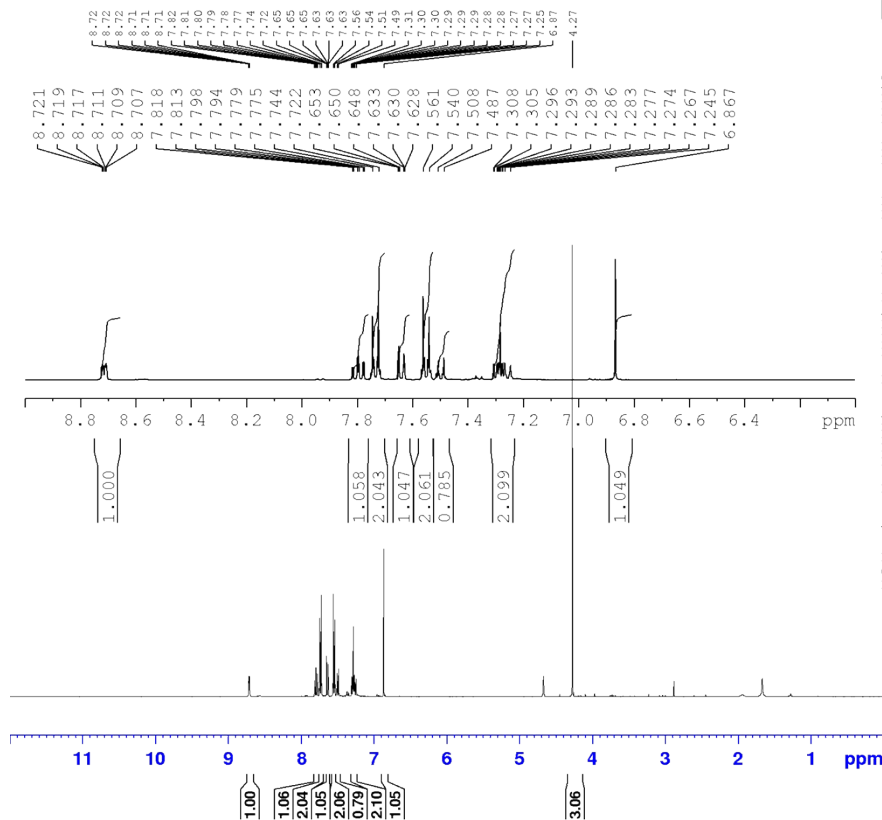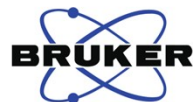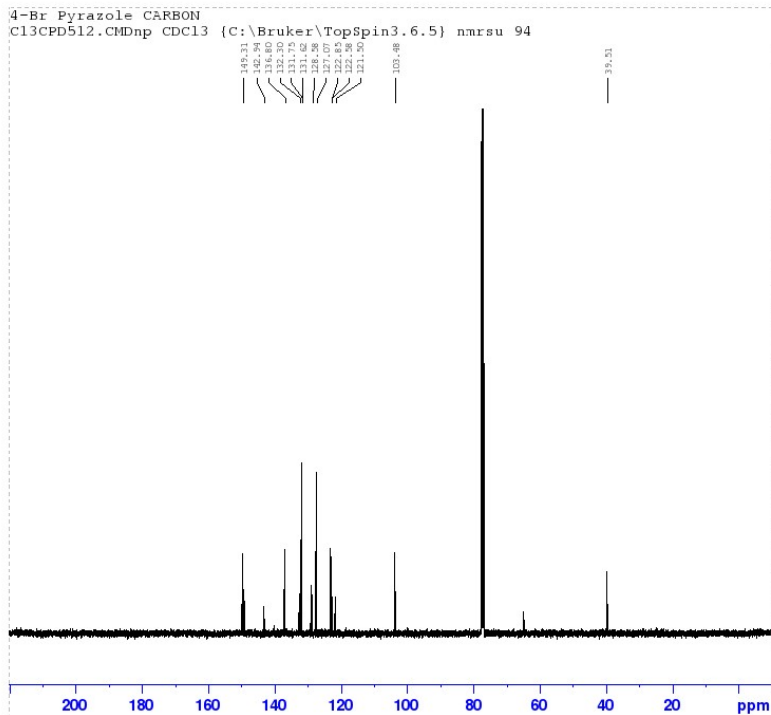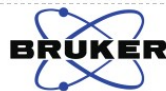





# Synthesis of 2-(5-(4-methoxyphenyl)-1-methyl-1H-pyrazol-3-yl)pyridine (P8)

4-Ome Pyrazole

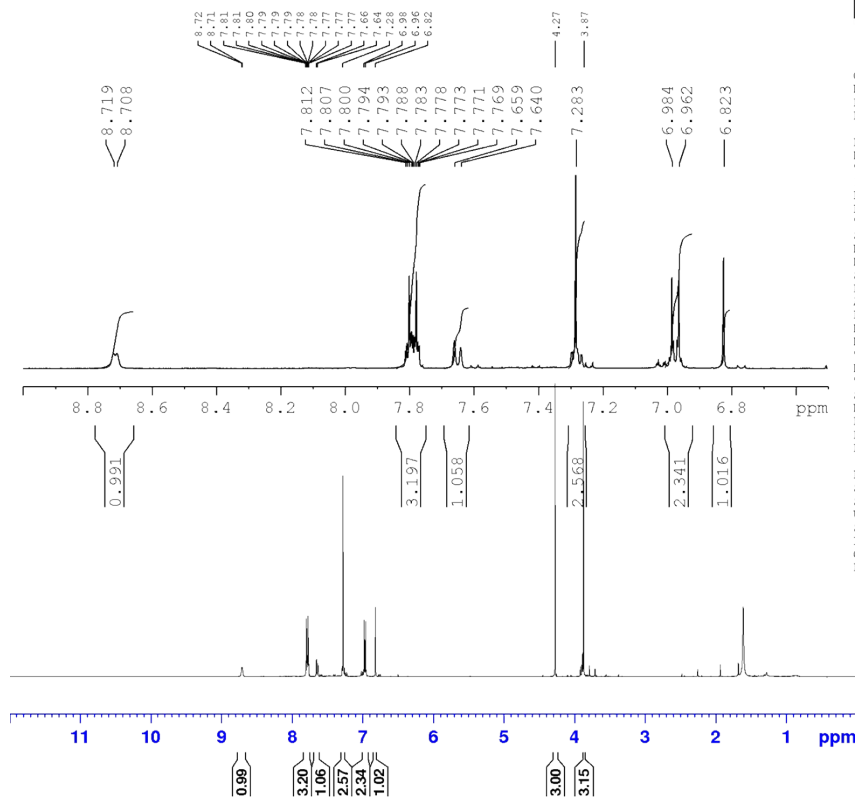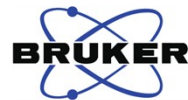

Current Data Parameters  
 NAME Apr18-2024-Alex  
 EXPNO 30  
 PROCNO 1

F2 - Acquisition Parameters  
 Date\_ 20240418  
 Time 14.15 h  
 INSTRUM av400  
 PROBHD Z104450\_0135 ( )  
 PULPROG zg30  
 TD 65536  
 SOLVENT CDC13  
 NS 16  
 DS 2  
 SWH 6410.256 Hz  
 FIDRES 0.195625 Hz  
 AQ 5.1118078 sec  
 RG 209.43  
 DW 78.000 usec  
 DE 6.50 usec  
 TE 298.2 K  
 D1 1.0000000 sec  
 TDO 1  
 SFO1 400.1324008 MHz  
 NUC1 1H  
 P0 5.00 usec  
 F1 15.00 usec  
 PLW1 11.20899963 W

F2 - Processing parameters  
 SI 32768  
 SF 400.1300000 MHz  
 WDW EM  
 SSB 0  
 LB 0.30 Hz  
 GB 0  
 PC 1.00

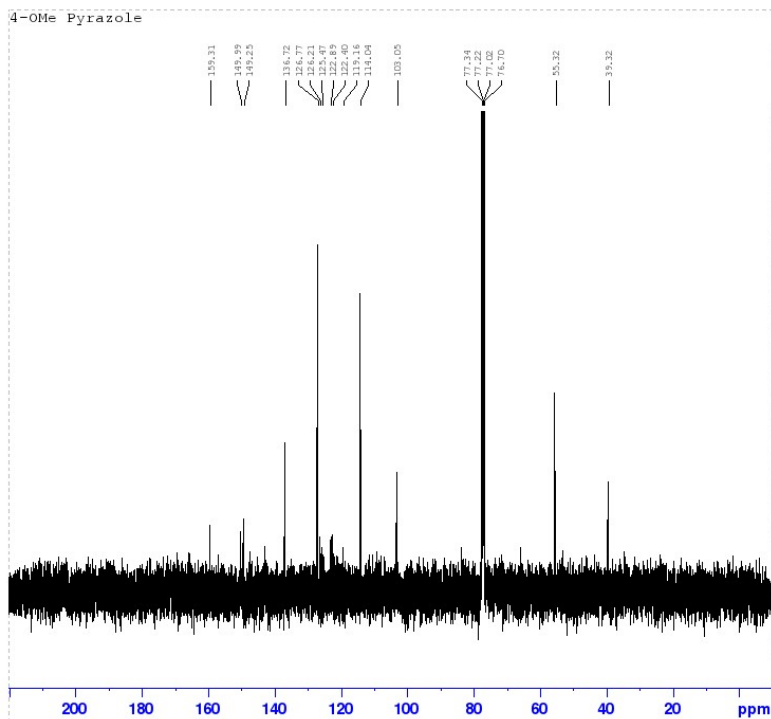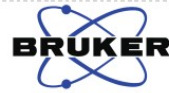

Current Data Parameters  
 NAME Apr18-2024-Alex  
 EXPNO 40  
 PROCNO 1

F2 - Acquisition Parameters  
 Date\_ 20240418  
 Time 14.54 h  
 INSTRUM av400  
 PROBHD z104450\_0135 ( )  
 PULPROG zgpg30  
 TD 65536  
 SOLVENT cdcl3  
 NS 512  
 DS 4  
 SWH 23148.148 Hz  
 FIDRES 0.705425 Hz  
 AQ 1.4155777 sec  
 RG 209.43  
 DW 21.600 usec  
 DE 6.50 usec  
 TE 298.2 K  
 D1 2.0000000 sec  
 D11 0.0300000 sec  
 TDO 1  
 SFO1 100.6233329 MHz  
 NUC1 13C  
 P0 3.33 usec  
 F1 10.00 usec  
 PLW1 51.51900101 W  
 SFO2 400.1316005 MHz  
 NUC2 1H  
 CFPDPRG2 waltz16  
 PCPD2 90.00 usec  
 PLW2 11.20899963 W  
 PLW12 0.31136999 W  
 PLW13 0.15662000 W

F2 - Processing parameters  
 SI 32768  
 SF 100.6127685 MHz  
 WDW EM  
 SSB 0  
 LB 1.00 Hz  
 GB 0  
 PC 1.40

# Synthesis of 4-(1-methyl-3-(pyridin-2-yl)-1H-pyrazol-5-yl)benzotrile (P6)

CN Pyrazole

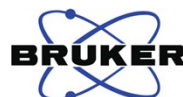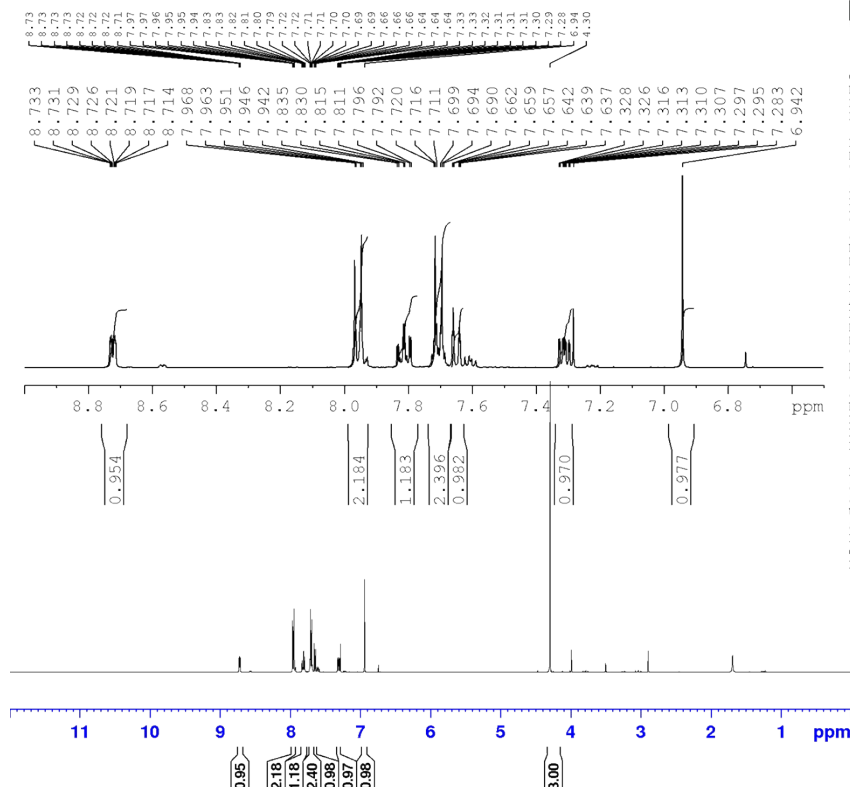

Current Data Parameters  
 NAME May03-2024-Alex  
 EXPNO 10  
 PROCNO 1

F2 - Acquisition Parameters  
 Date\_ 20240503  
 Time 10.54 h  
 INSTRUM av400  
 PROBHD z104450\_0135 (  
 PULPROG zg30  
 TD 65536  
 SOLVENT CDCl3  
 NS 16  
 DS 2  
 SWH 6410.256 Hz  
 FIDRES 0.195625 Hz  
 AQ 5.1118078 sec  
 RG 209.43  
 DW 78.000 usec  
 DE 6.50 usec  
 TE 298.2 K  
 D1 1.00000000 sec  
 TD0 1  
 SFO1 400.1324008 MHz  
 NUC1 1H  
 PO 5.00 usec  
 P1 15.00 usec  
 PLW1 11.20899963 W

F2 - Processing parameters  
 SI 32768  
 SF 400.1300000 MHz  
 WDW EM  
 SSB 0  
 LB 0.30 Hz  
 GB 0  
 PC 1.00

CN Pyrazole

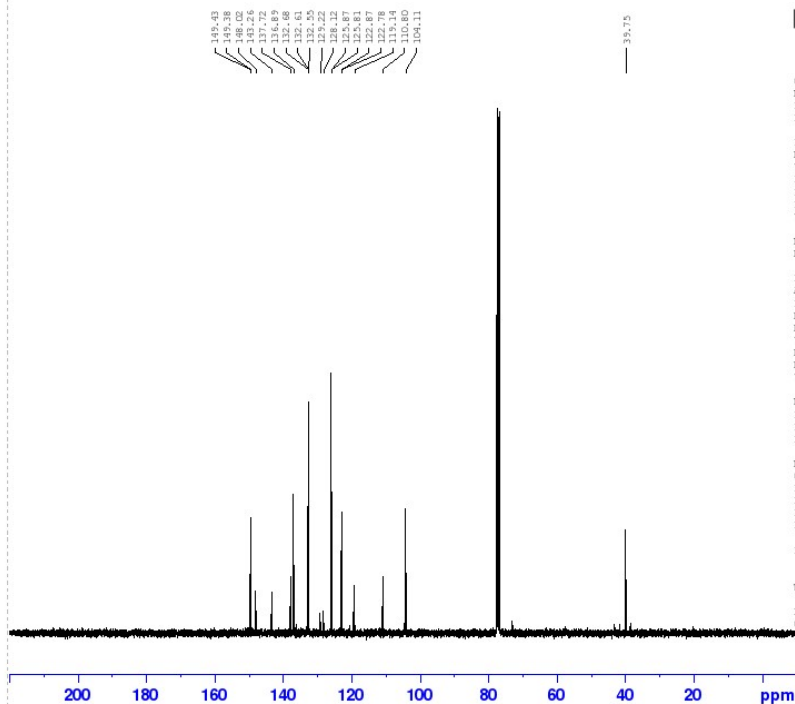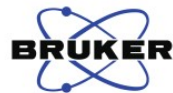

Current Data Parameters  
 NAME May03-2024-Alex  
 EXPNO 20  
 PROCNO 1

F2 - Acquisition Parameters  
 Date\_ 20240503  
 Time 11.32 h  
 INSTRUM av400  
 PROBHD z104450\_0135 (  
 PULPROG zgpg30  
 TD 65536  
 SOLVENT cdcl3  
 NS 512  
 DS 4  
 SWH 23148.148 Hz  
 FIDRES 0.706425 Hz  
 AQ 1.4153777 sec  
 RG 209.43  
 DW 21.600 usec  
 DE 6.50 usec  
 TE 298.2 K  
 D1 2.00000000 sec  
 D11 0.03000000 sec  
 TD0 1  
 SFO1 100.6233323 MHz  
 NUC1 13C  
 PO 3.33 usec  
 P1 10.00 usec  
 PLW1 51.51900101 W  
 SFO2 400.1316005 MHz  
 NUC2 1H  
 CPDPRG12 waltz16  
 PCPD2 90.00 usec  
 PLW2 11.20899963 W  
 PLW12 0.31136999 W  
 PLW13 0.15662000 W

F2 - Processing parameters  
 SI 32768  
 SF 100.6127685 MHz  
 WDW EM  
 SSB 0  
 LB 1.00 Hz  
 GB 0  
 PC 1.40

# Synthesis of 2-(5-(4-methoxyphenyl)-1-methyl-1H-pyrazol-3-yl)pyridine (P7)

N02 Pyrazole

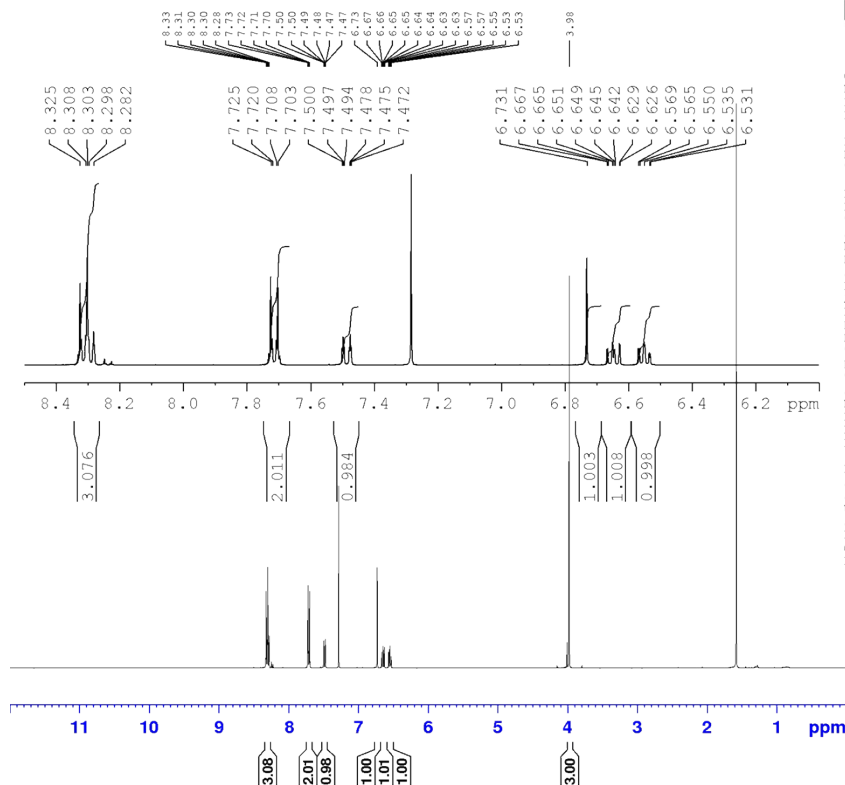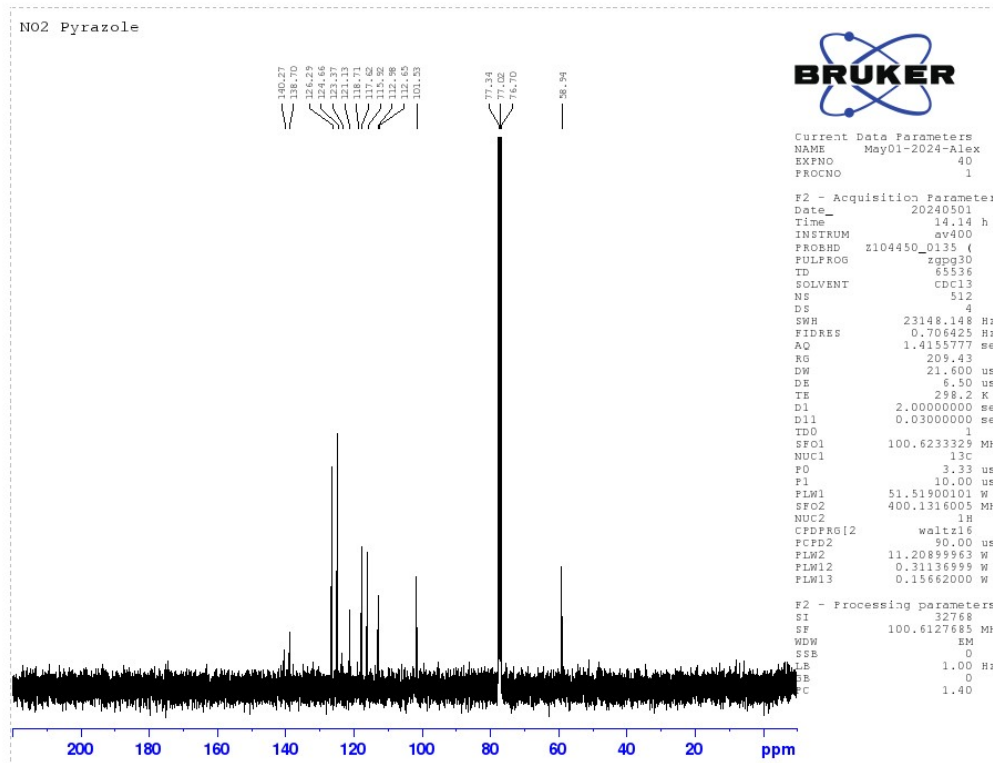

# Synthesis of 2-(5-(3,4-dimethoxyphenyl)-1-methyl-1H-pyrazol-3-yl)pyridine (P9)

3,4 OMe Pyrazole

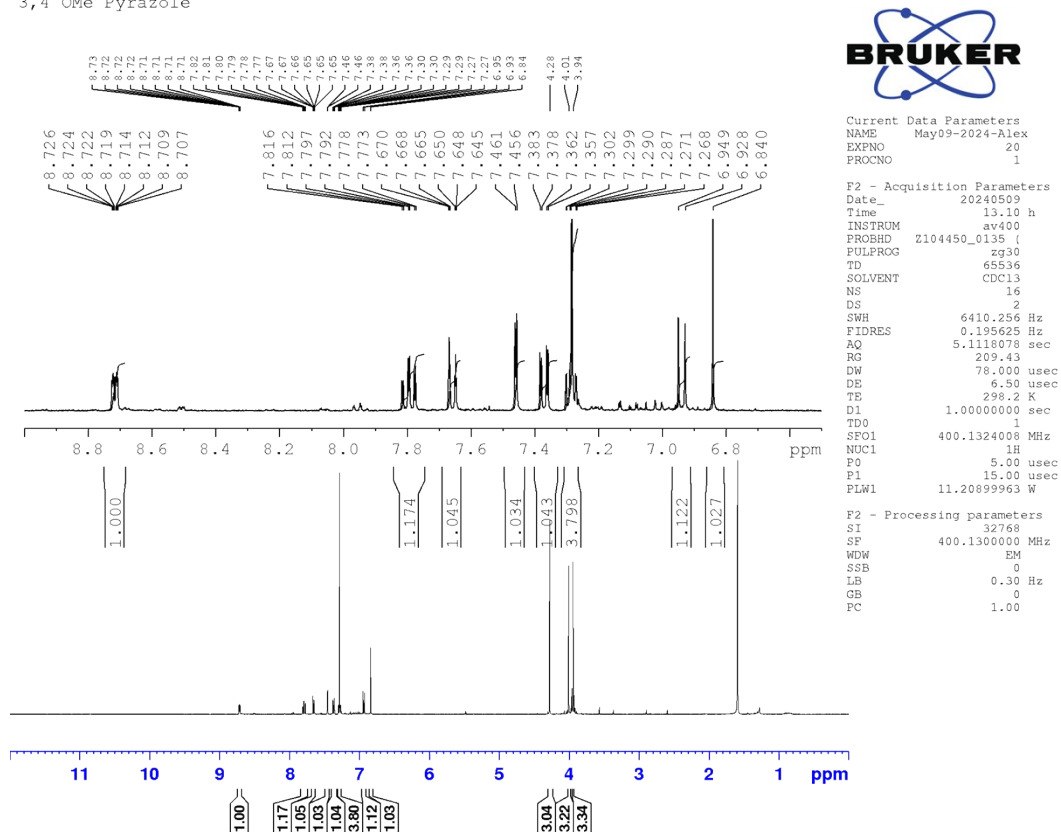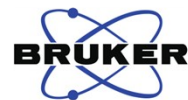

Current Data Parameters  
 NAME May09-2024-Alex  
 EXPNO 20  
 PROCNO 1

F2 - Acquisition Parameters  
 Date\_ 20240509  
 Time 13.10 h  
 INSTRUM av400  
 PROBHD Z104450\_0135 ( )  
 PULPROG zg30  
 TD 65536  
 SOLVENT CDC13  
 NS 16  
 DS 2  
 SWH 6410.256 Hz  
 FIDRES 0.195625 Hz  
 AQ 5.1116078 sec  
 RG 209.43  
 DW 78.000 usec  
 DE 6.50 usec  
 TE 298.2 K  
 D1 1.00000000 sec  
 TDO 1  
 SFO1 400.1324008 MHz  
 NUC1 1H  
 P0 5.00 usec  
 P1 15.00 usec  
 PLW1 11.20899963 W

F2 - Processing parameters  
 SI 32768  
 SF 400.1300000 MHz  
 WDW EM  
 SSB 0  
 LB 0.30 Hz  
 GB 0  
 PC 1.00

3,4 Pyrazole CARBON  
 C13CPD512.CMDnp CDC13 {C:\Bruker\TopSpin3.6.5} nmr50 92

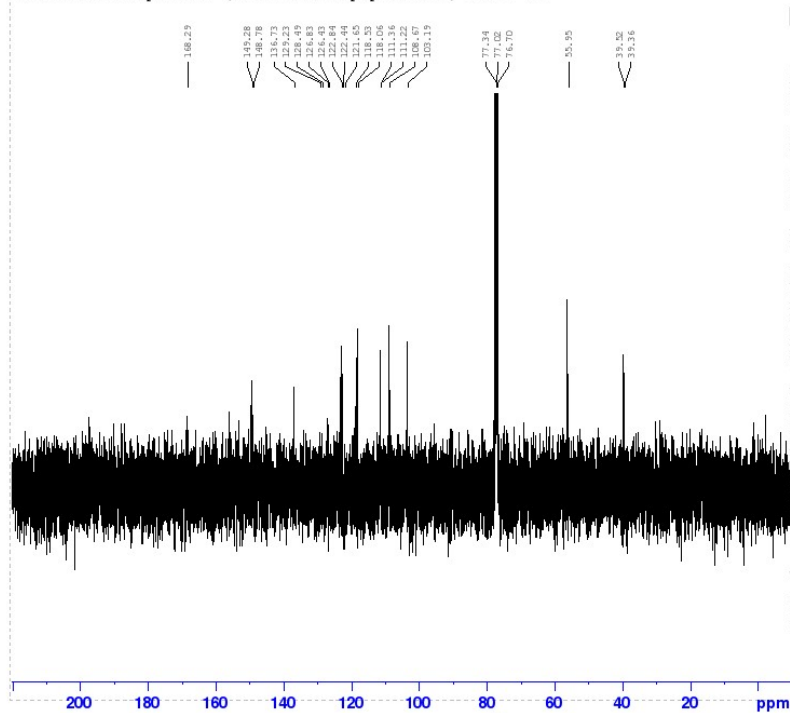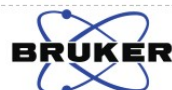

Current Data Parameters  
 NAME May09-2024-Alex  
 EXPNO 30  
 PROCNO 1

F2 - Acquisition Parameters  
 Date\_ 20240509  
 Time 14.32 h  
 INSTRUM av400  
 PROBHD Z104450\_0135 ( )  
 PULPROG zgpg30  
 TD 65536  
 SOLVENT CDC13  
 NS 512  
 DS 4  
 SWH 23148.148 Hz  
 FIDRES 0.705425 Hz  
 AQ 1.4155777 sec  
 RG 209.43  
 DW 21.600 usec  
 DE 6.50 usec  
 TE 298.2 K  
 D1 2.00000000 sec  
 D11 0.03000000 sec  
 TDO 1  
 SFO1 100.6233329 MHz  
 NUC1 13C  
 P0 3.33 usec  
 P1 10.00 usec  
 PLW1 51.51900101 W  
 SFO2 400.1316005 MHz  
 NUC2 1H  
 P2PRG12 waltz16  
 PCFD2 90.00 usec  
 PLW2 11.20899963 W  
 PLW12 0.31136999 W  
 PLW13 0.15662000 W

F2 - Processing parameters  
 SI 32768  
 SF 100.6127685 MHz  
 WDW EM  
 SSB 0  
 LB 1.00 Hz  
 GB 0  
 PC 1.40

# Reaction Screening <sup>1</sup>H NMR Studies

Solvent Screen: MeOH

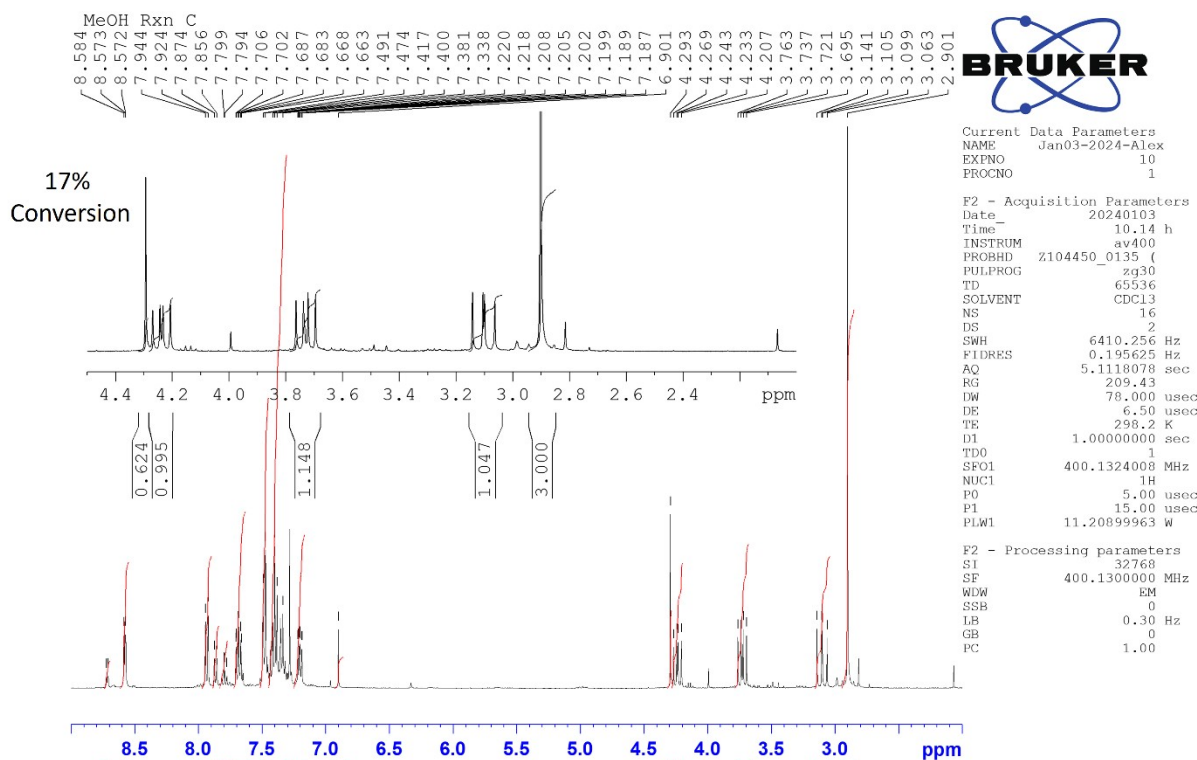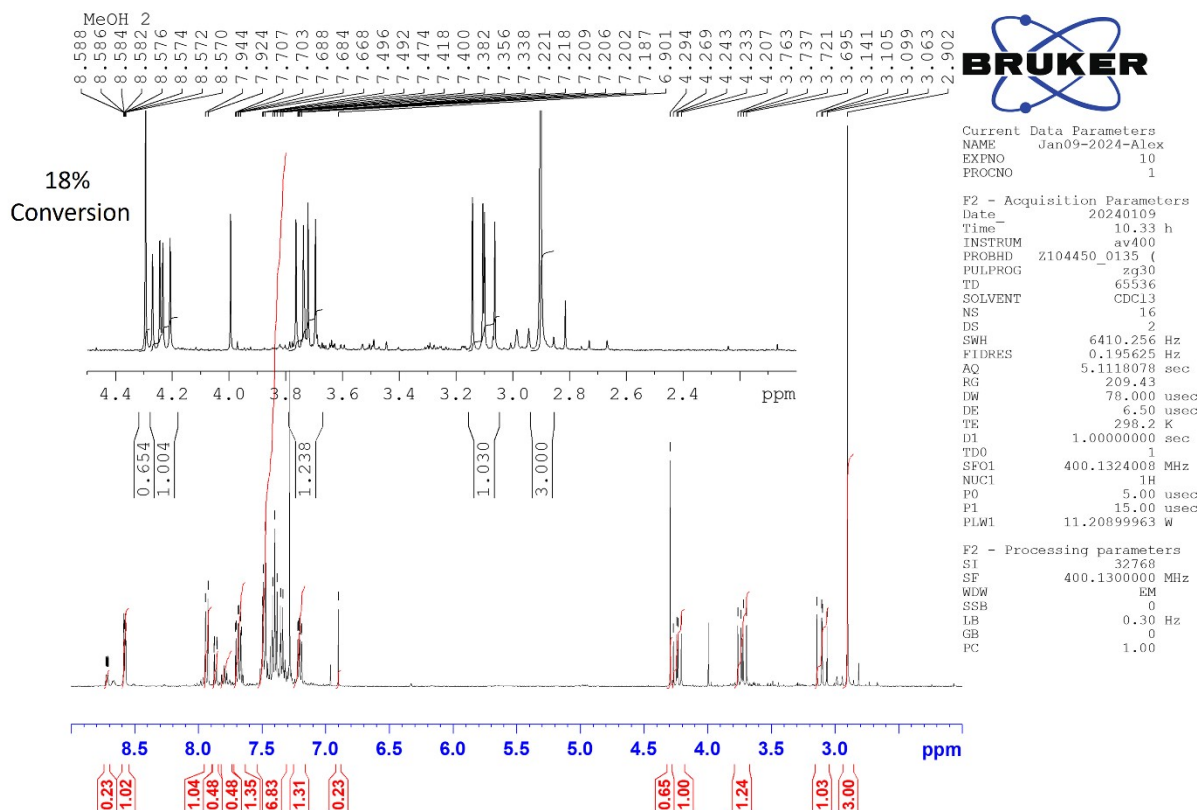

# Solvent Screen: EtOH

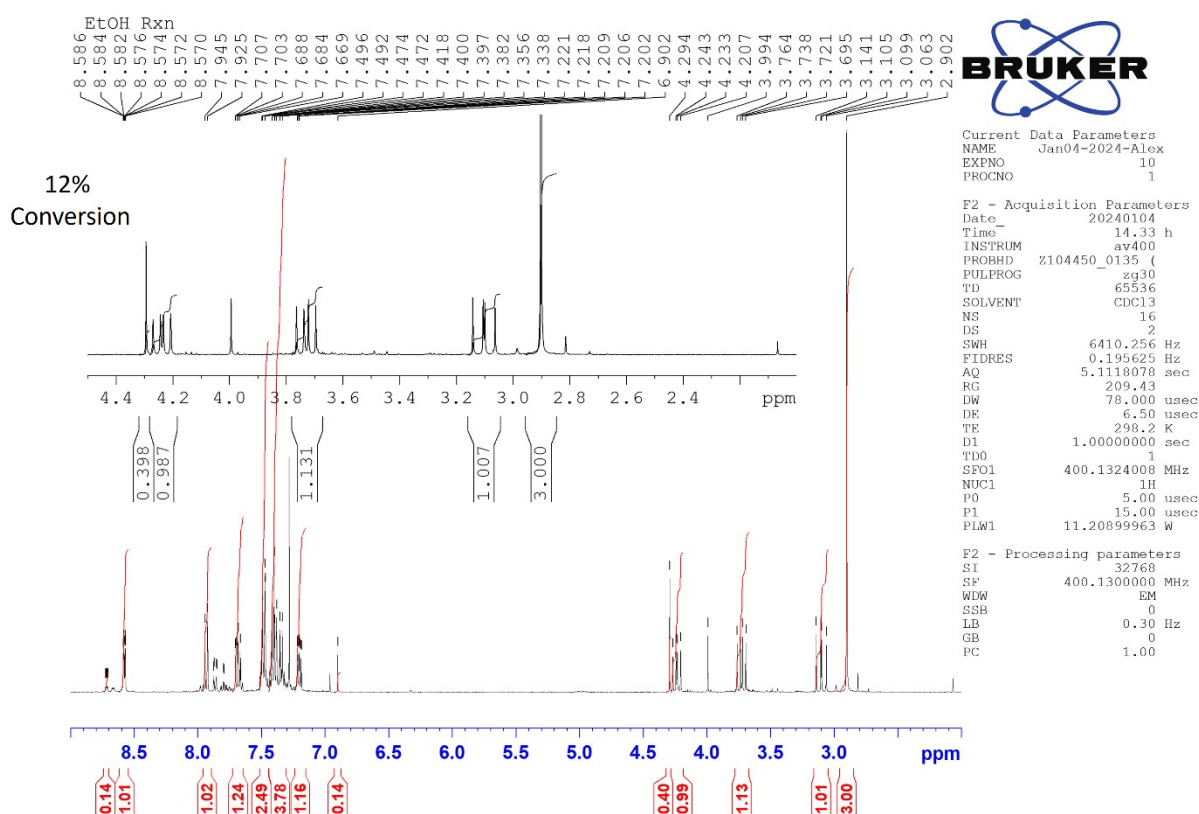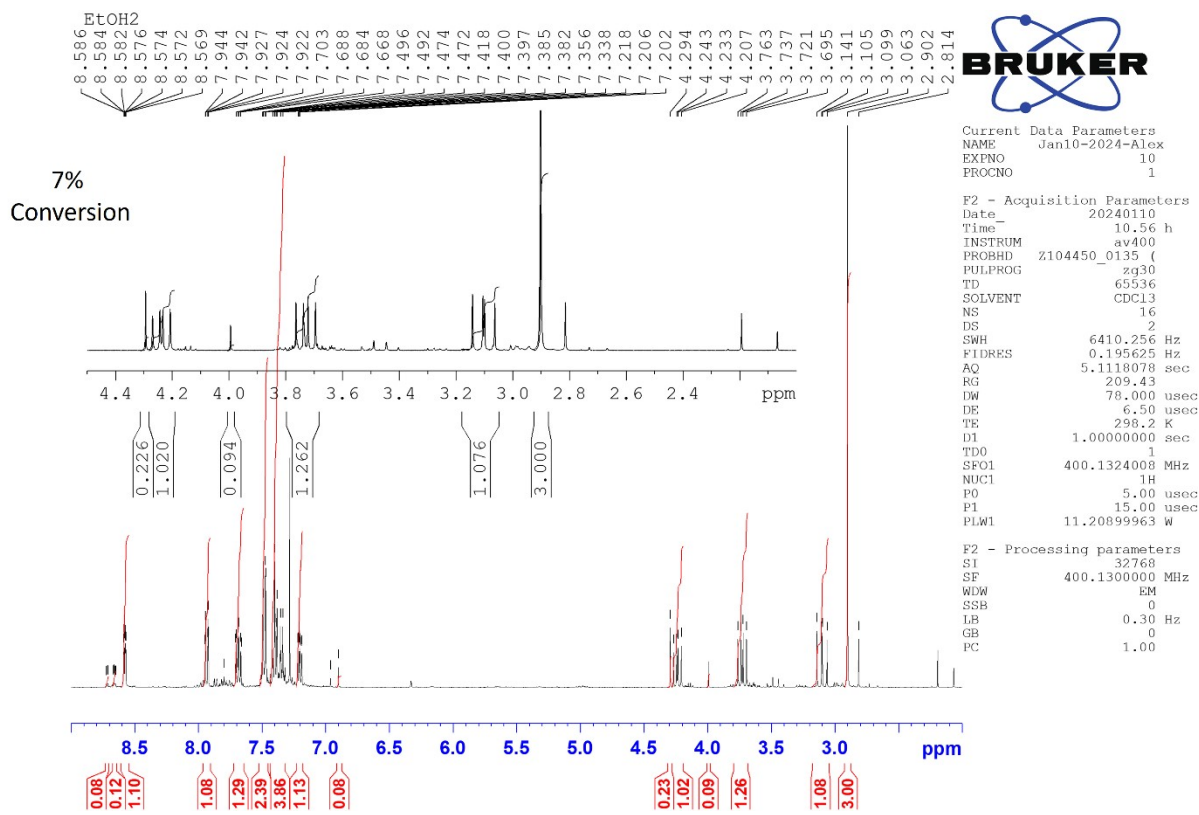

# Solvent Screen: EtOH

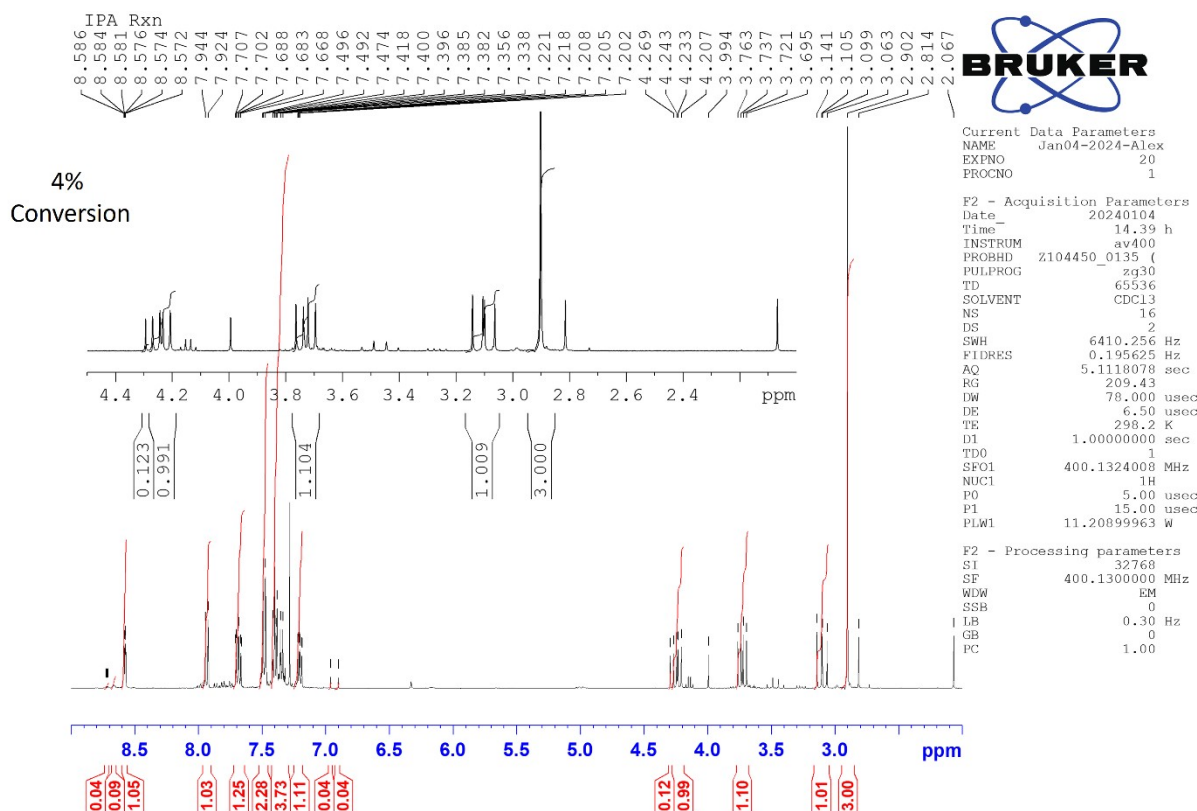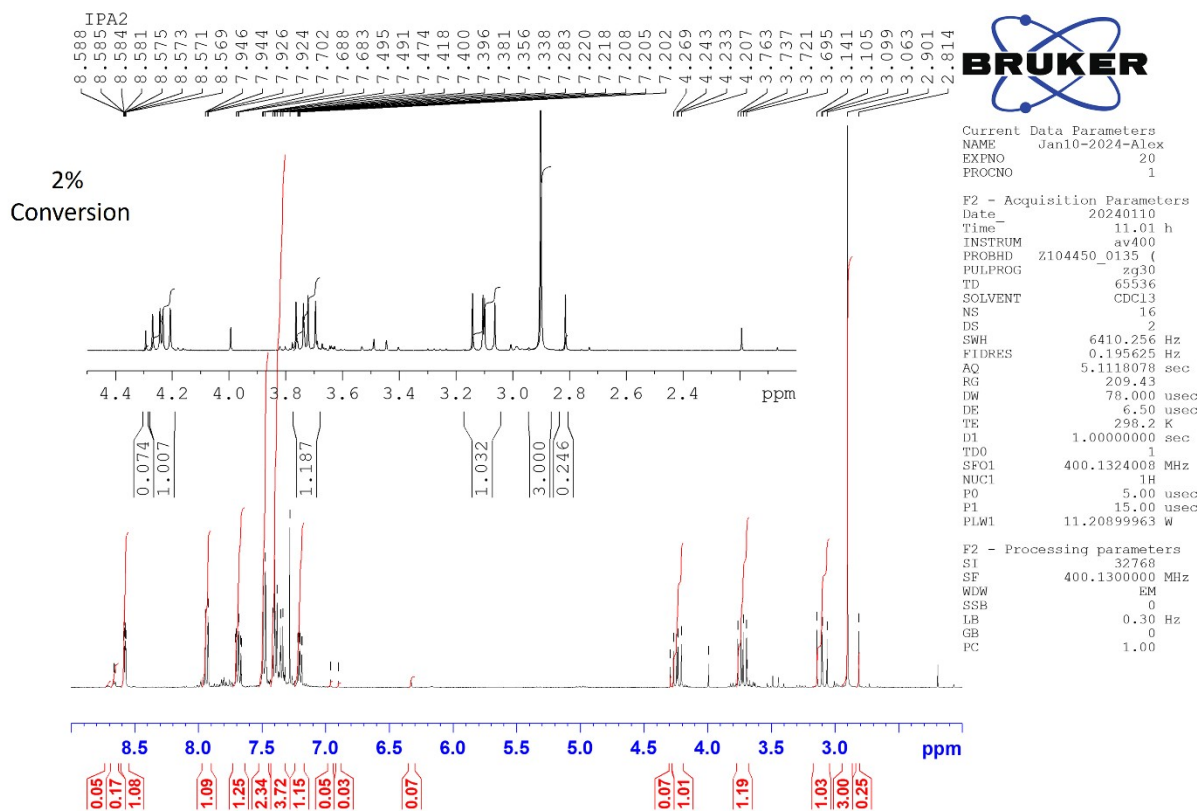



# Solvent Screen: MeCN

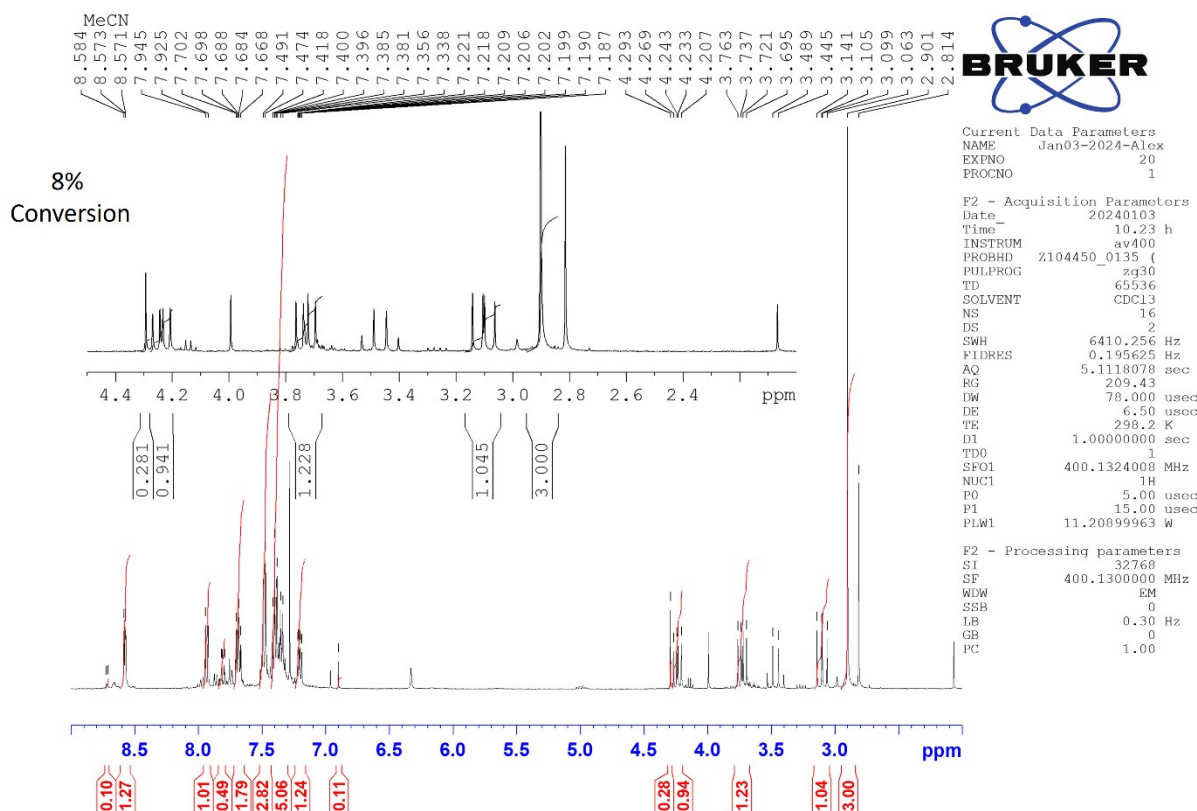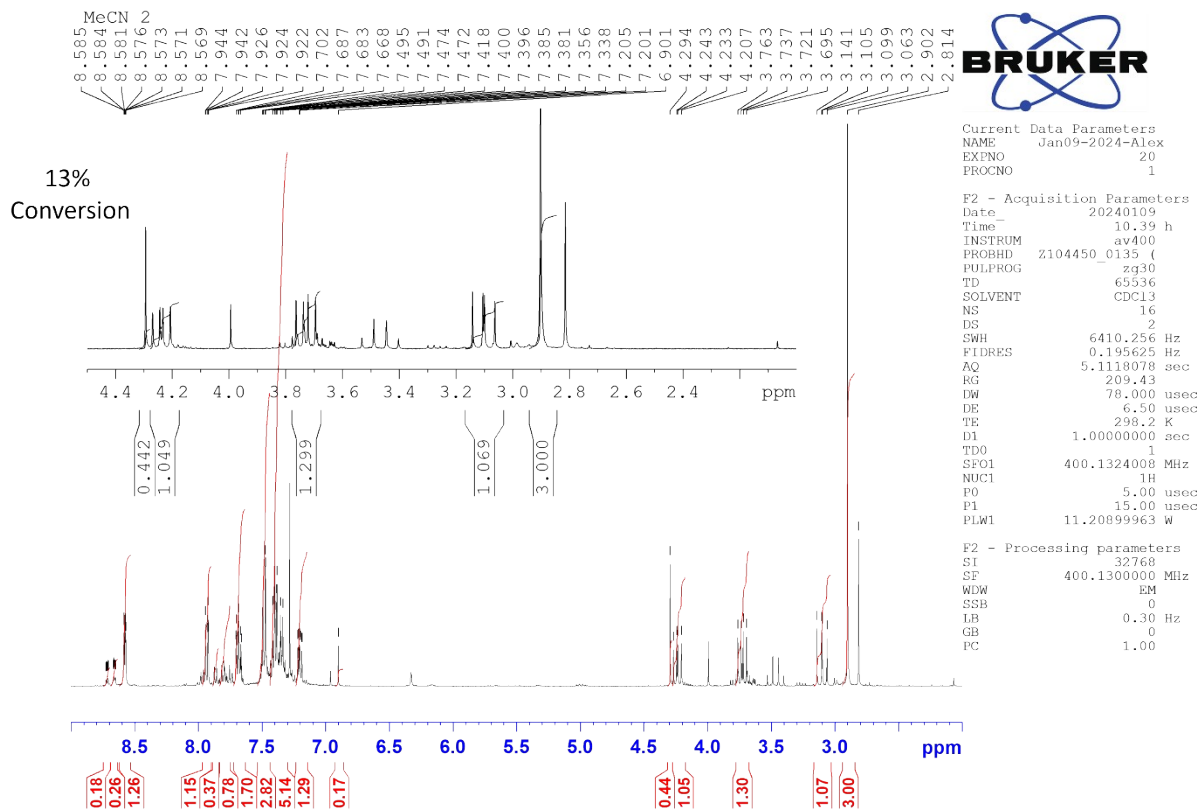

# Solvent Screen: THF

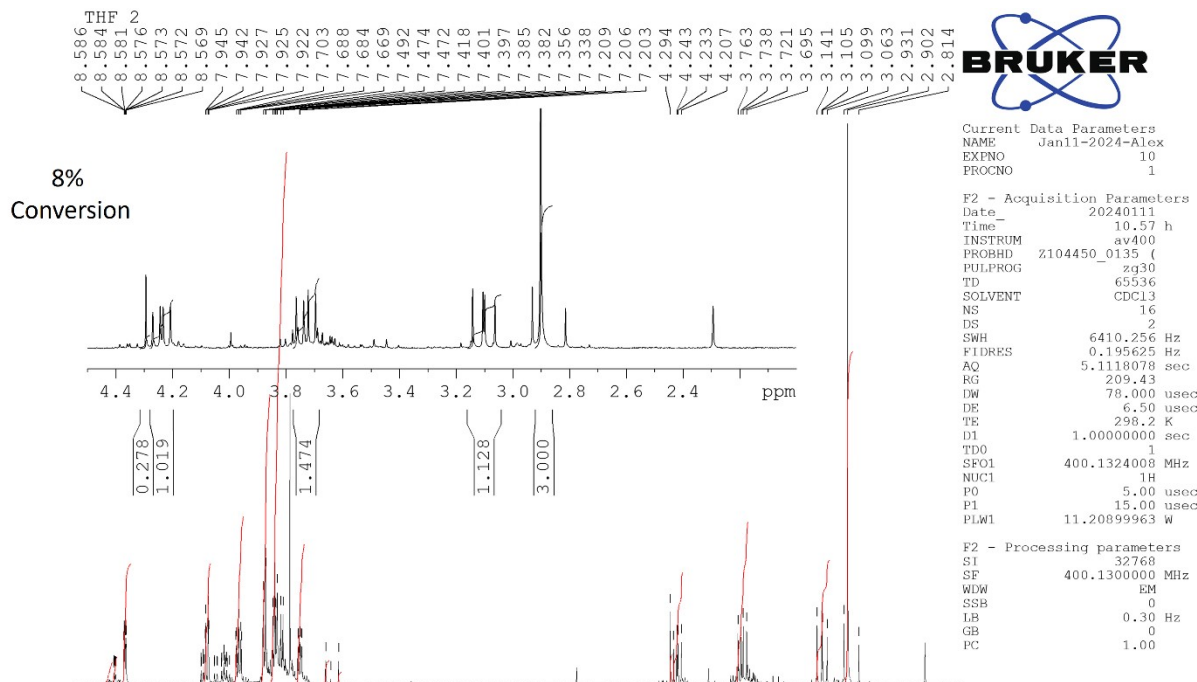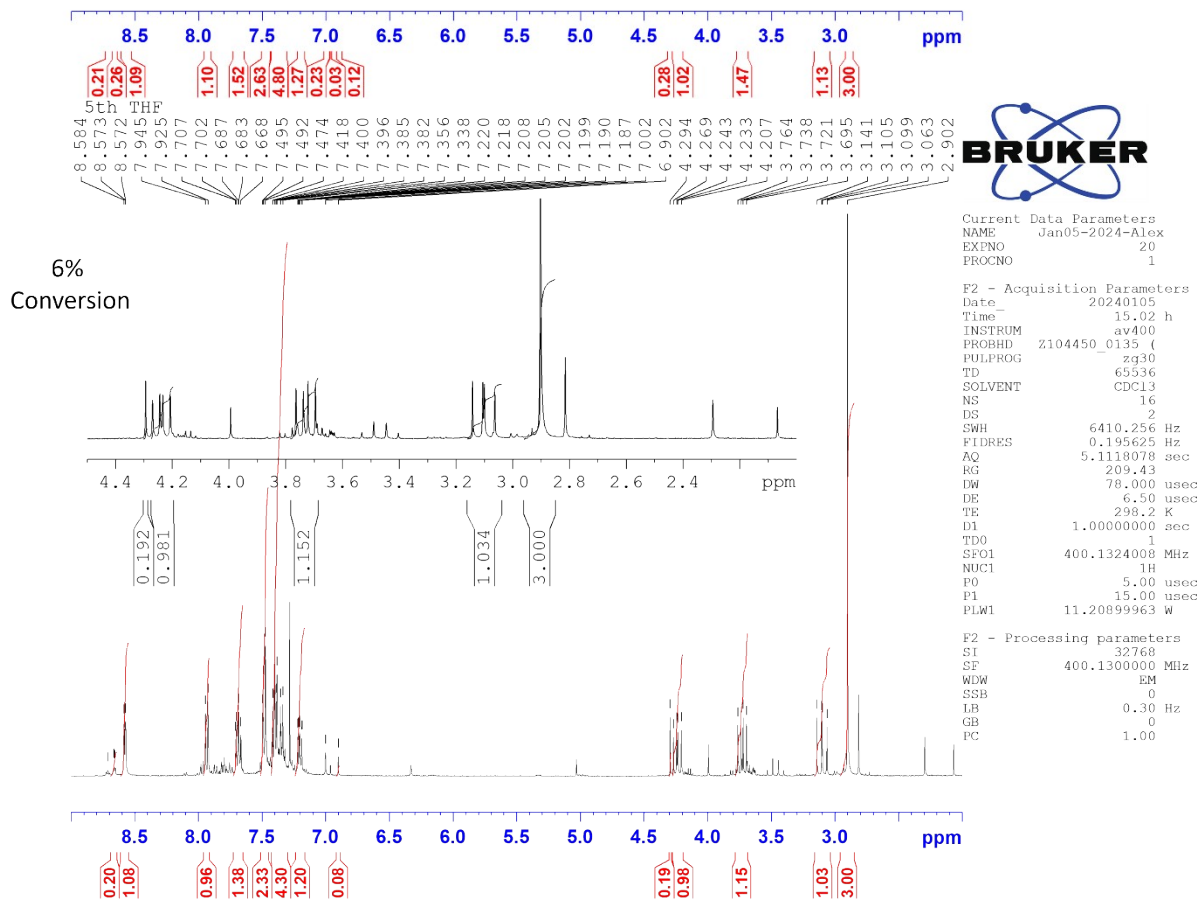

# Solvent Screen: CH<sub>2</sub>Cl<sub>2</sub>

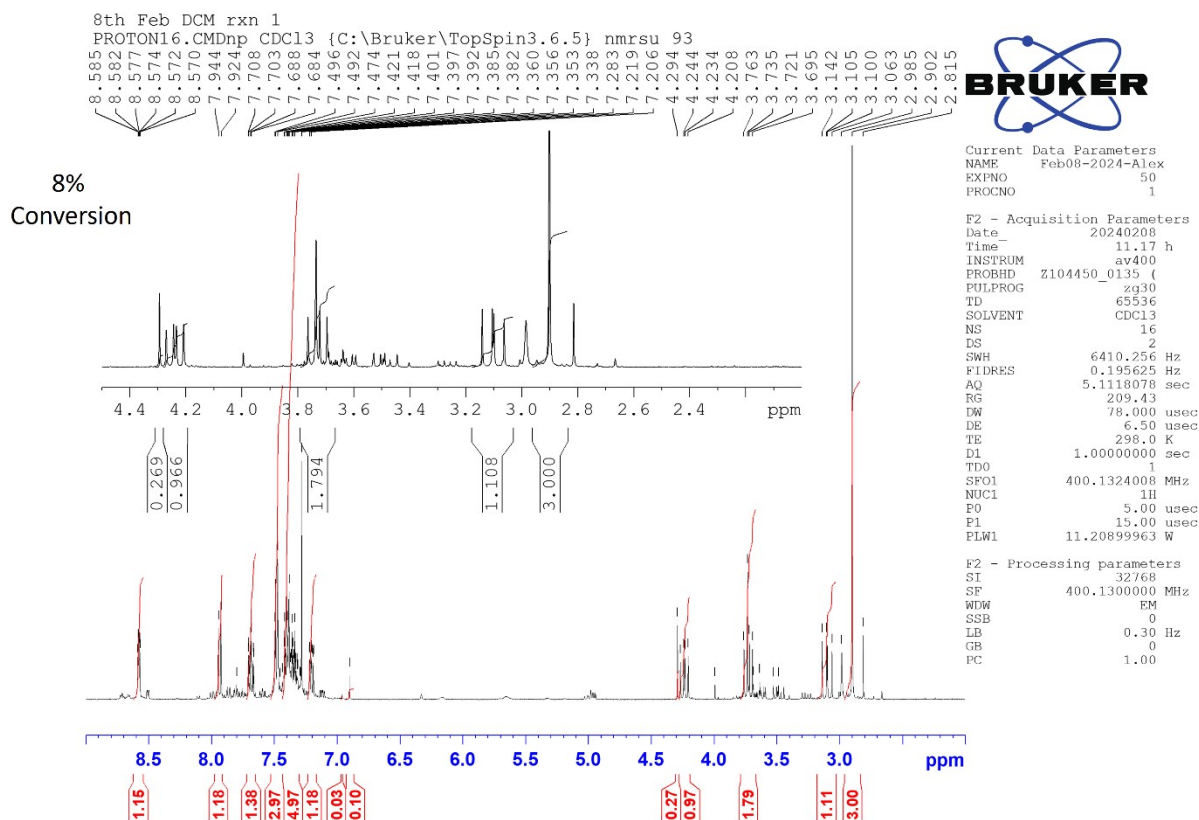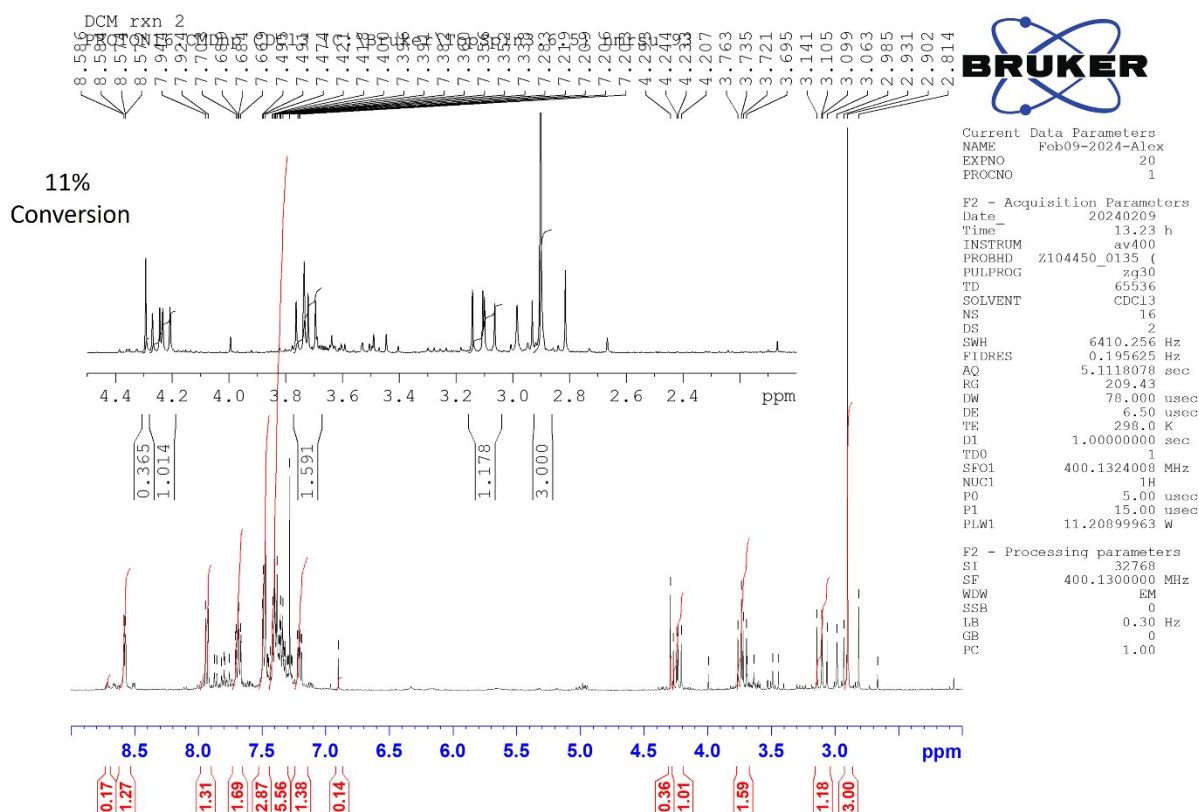

# Solvent Screen: CHCl<sub>3</sub>

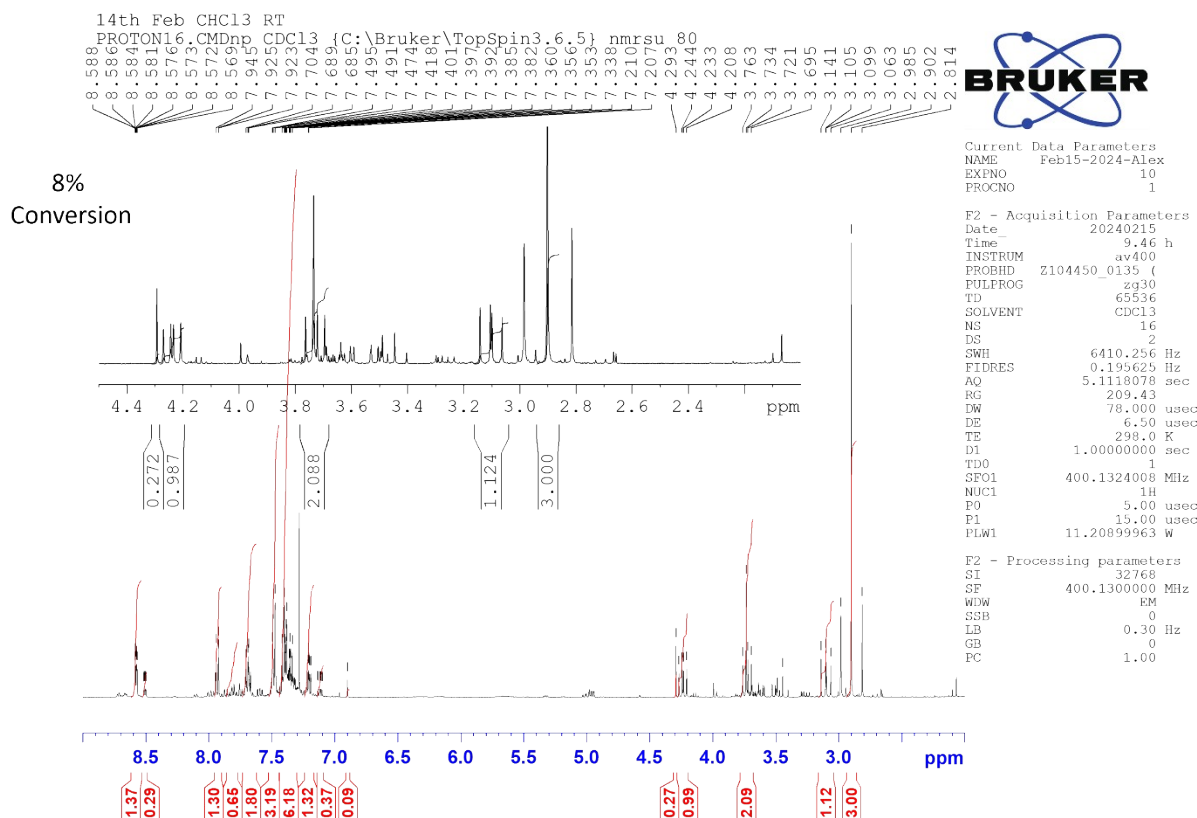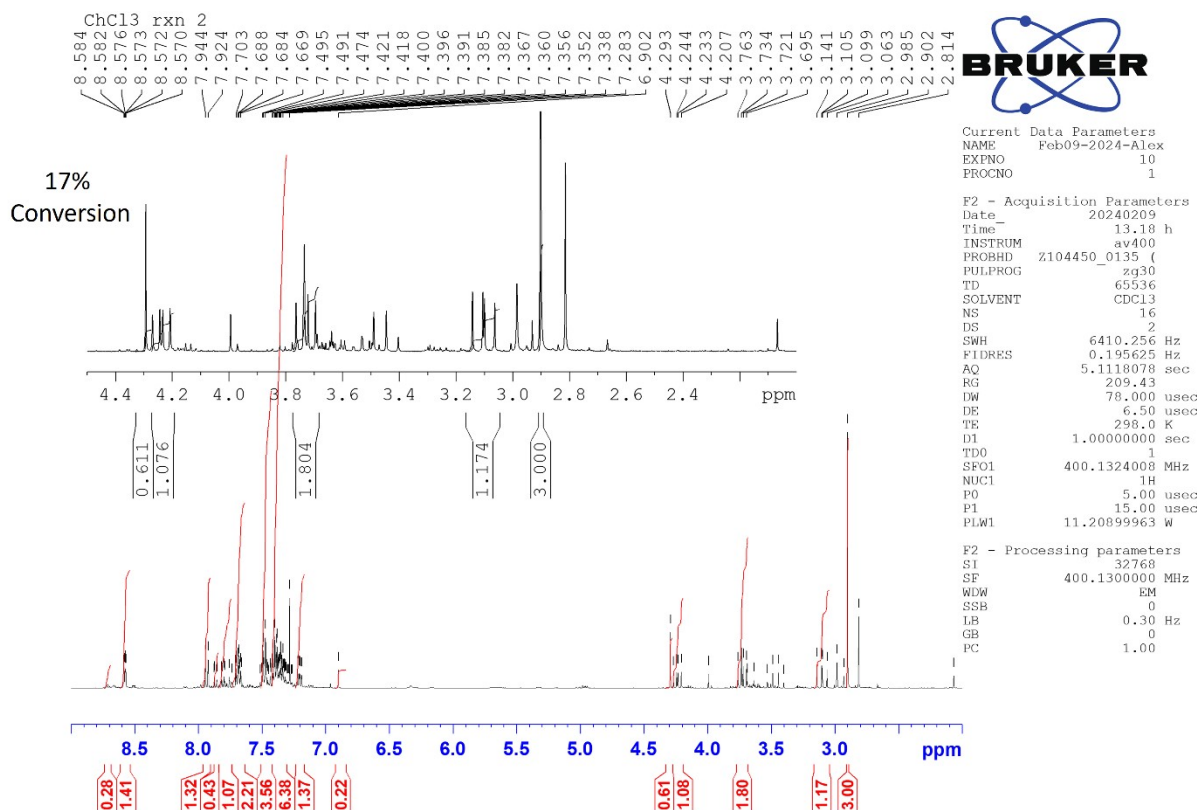

# Solvent Screen: Hexane

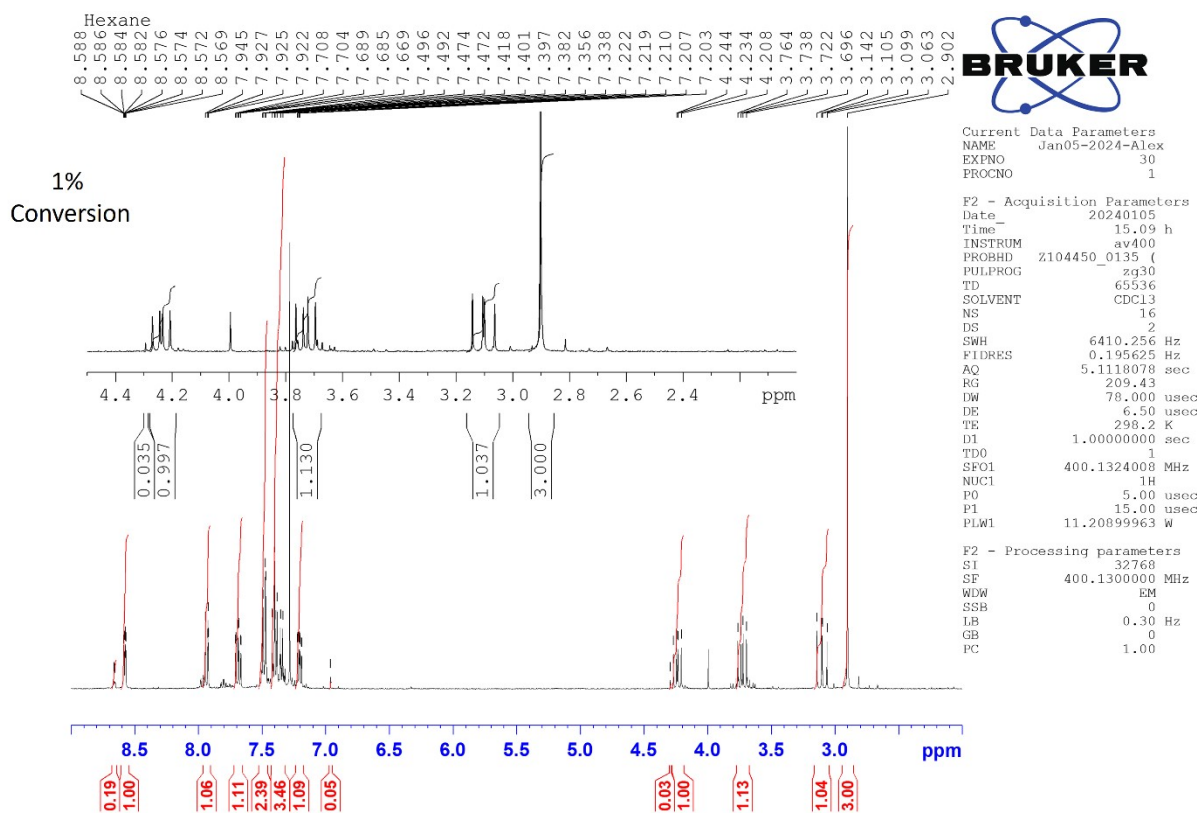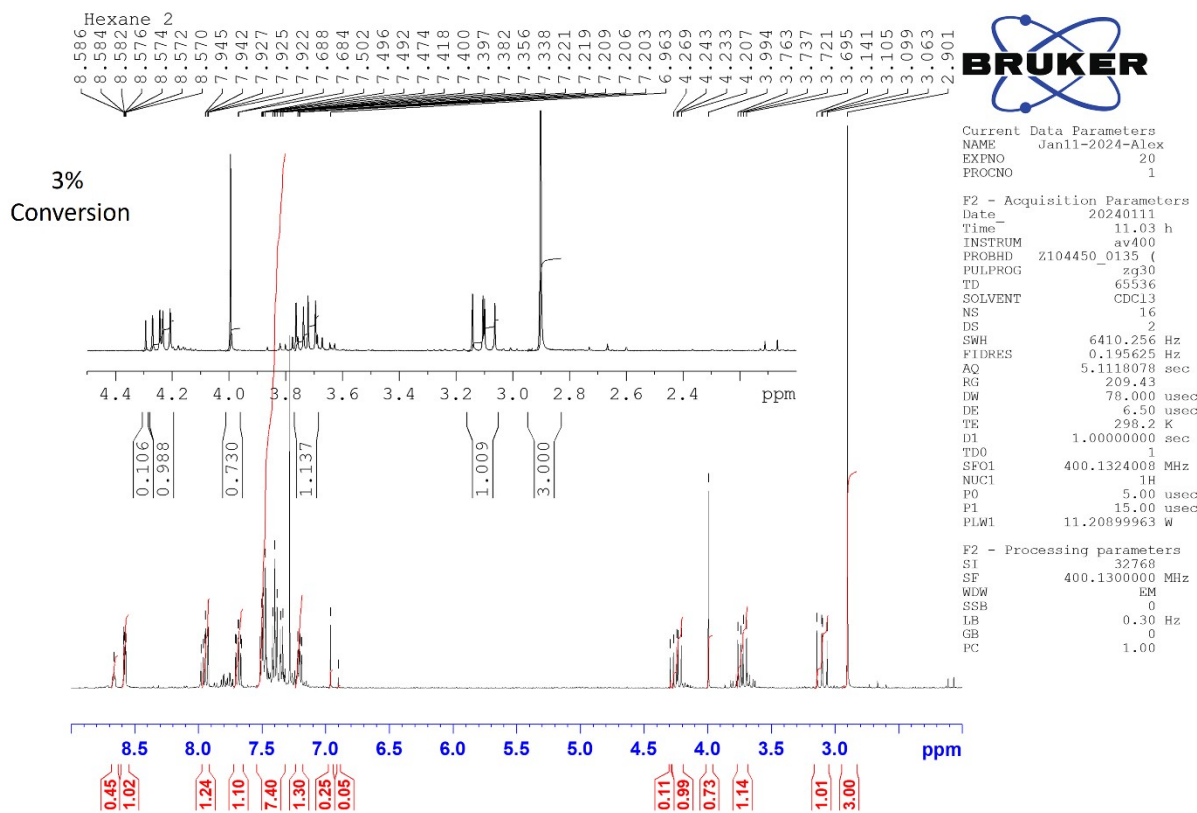

# Solvent Screen: 40°C Temperature

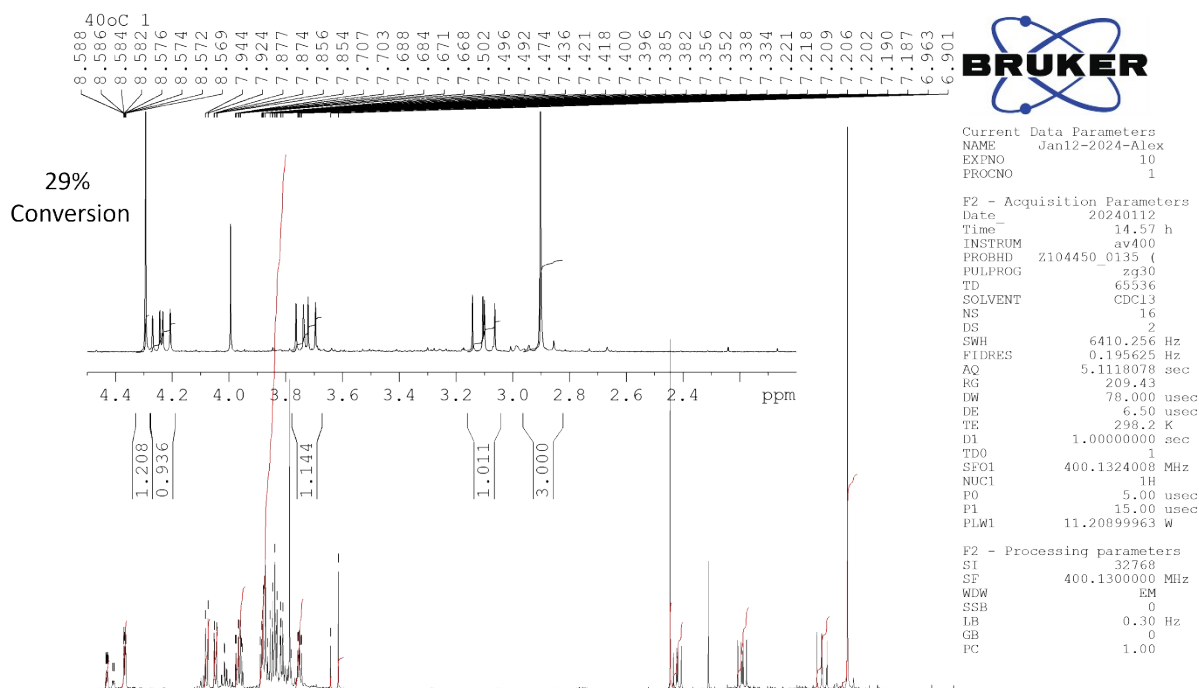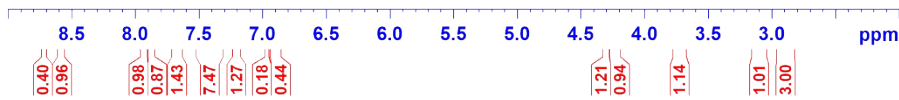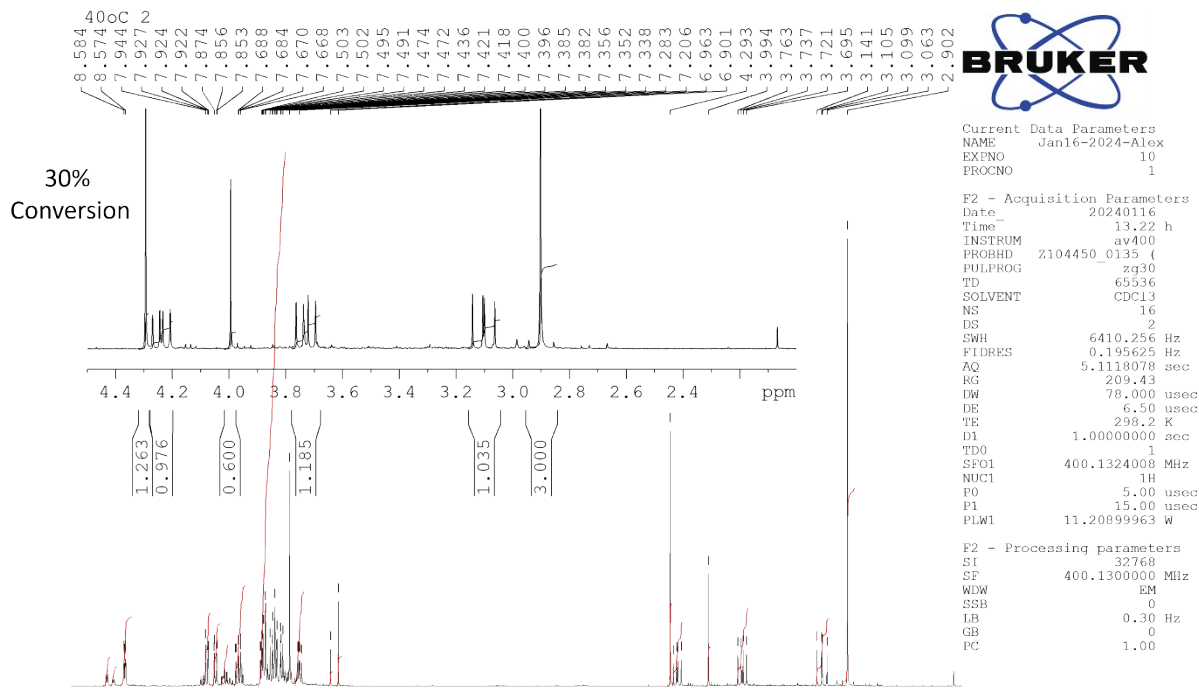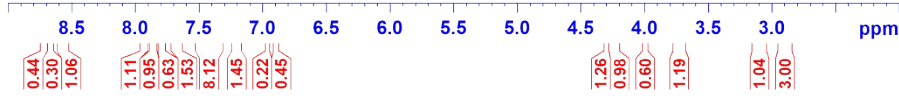

# Solvent Screen: 60°C Temperature

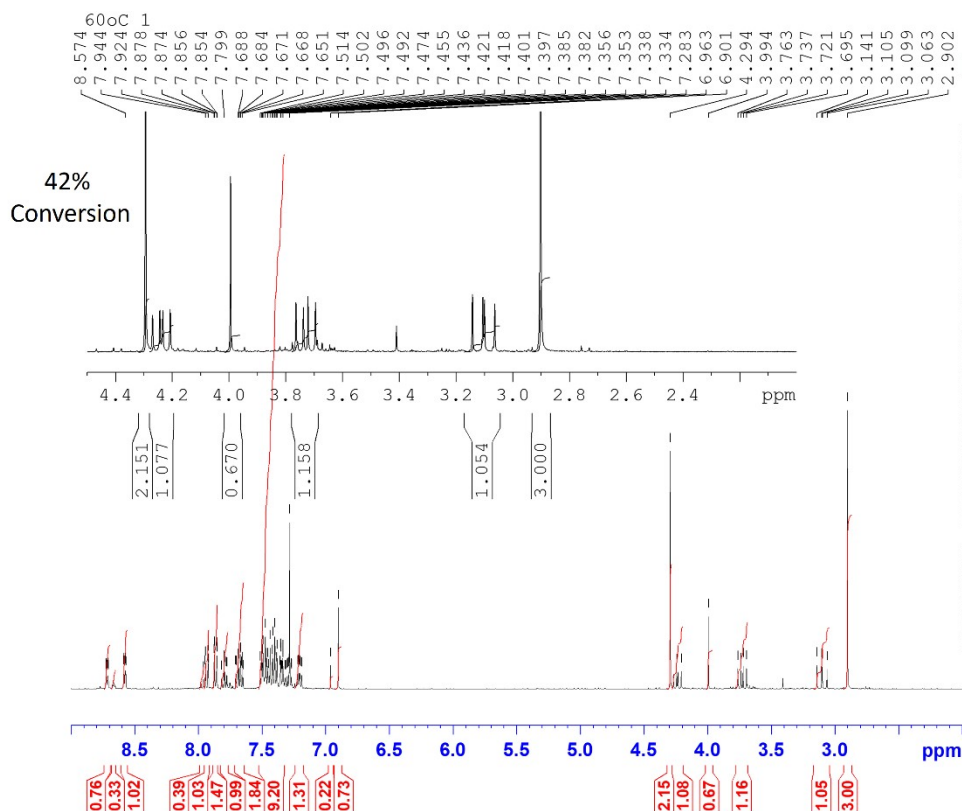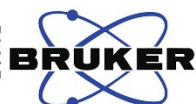

Current Data Parameters  
 NAME Jan23-2024-Alex  
 EXPNO 10  
 PROCNO 1

F2 - Acquisition Parameters  
 Date 20240123  
 Time 10.45 h  
 INSTRUM av400  
 PROBHD Z104450\_0135 ( )  
 PULPROG zg30  
 TD 65536  
 SOLVENT CDCl3  
 NS 16  
 DS 2  
 SWH 6410.256 Hz  
 FIDRES 0.195625 Hz  
 AQ 5.1118078 sec  
 RG 209.43  
 DW 78.000 usec  
 DE 6.50 usec  
 TE 298.2 K  
 D1 1.00000000 sec  
 TDO 1  
 SFO1 400.1324008 MHz  
 NUC1 1H  
 PO 5.00 usec  
 P1 15.00 usec  
 PLW1 11.20899963 W

F2 - Processing parameters  
 SI 32768  
 SF 400.1300000 MHz  
 WDW EM  
 SSB 0  
 LB 0.30 Hz  
 GB 0  
 PC 1.00

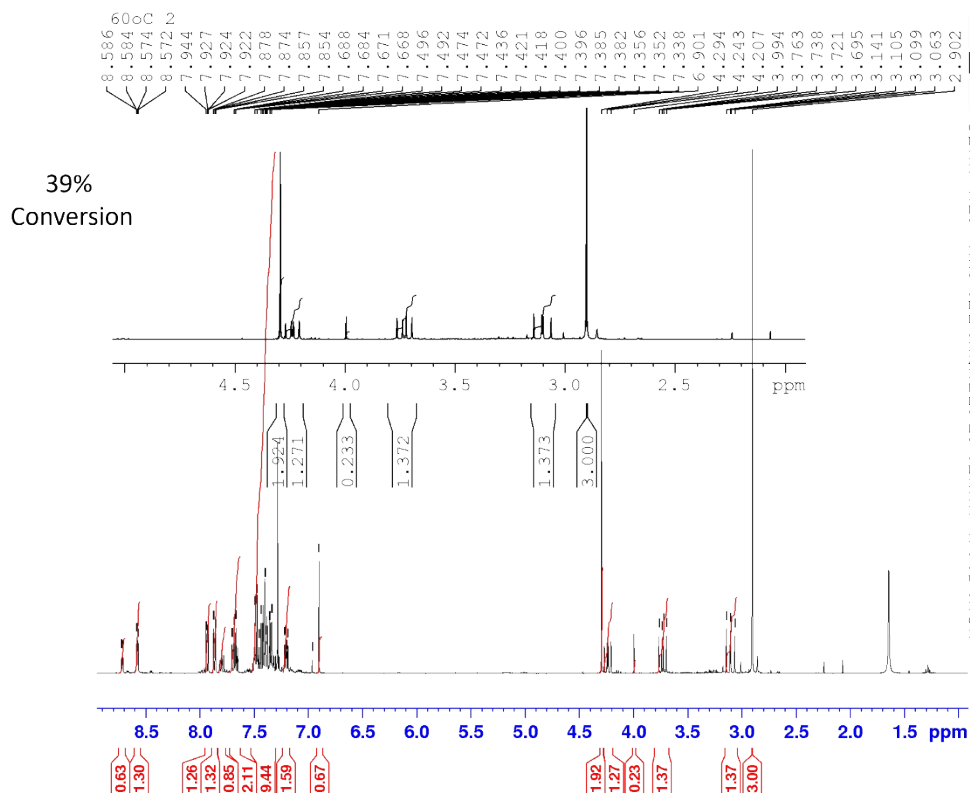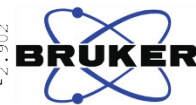

Current Data Parameters  
 NAME Jan12-2024-Alex  
 EXPNO 20  
 PROCNO 1

F2 - Acquisition Parameters  
 Date 20240112  
 Time 15.02 h  
 INSTRUM av400  
 PROBHD Z104450\_0135 ( )  
 PULPROG zg30  
 TD 65536  
 SOLVENT CDCl3  
 NS 16  
 DS 2  
 SWH 6410.256 Hz  
 FIDRES 0.195625 Hz  
 AQ 5.1118078 sec  
 RG 209.43  
 DW 78.000 usec  
 DE 6.50 usec  
 TE 298.2 K  
 D1 1.00000000 sec  
 TDO 1  
 SFO1 400.1324008 MHz  
 NUC1 1H  
 PO 5.00 usec  
 P1 15.00 usec  
 PLW1 11.20899963 W

F2 - Processing parameters  
 SI 32768  
 SF 400.1300000 MHz  
 WDW EM  
 SSB 0  
 LB 0.30 Hz  
 GB 0  
 PC 1.00

Eq. Screen: 1.5 eq. H<sub>2</sub>NNHMe

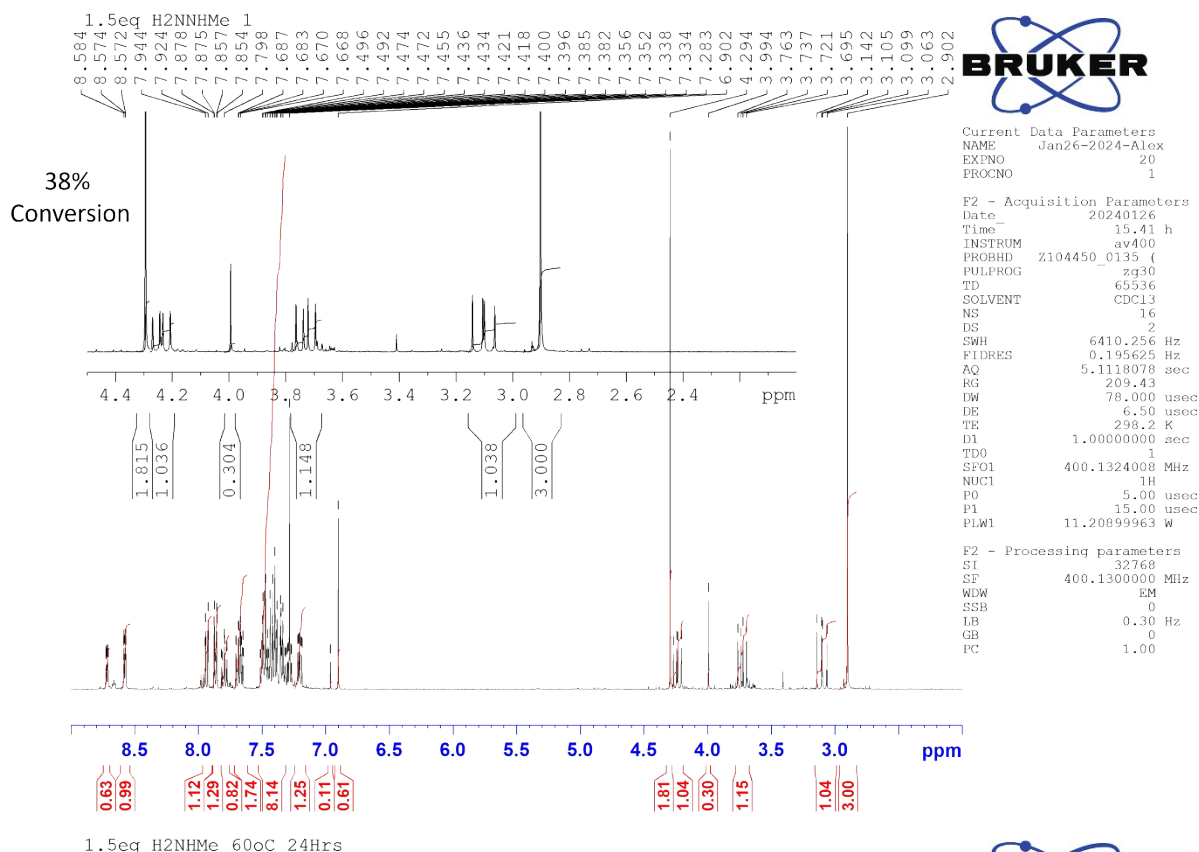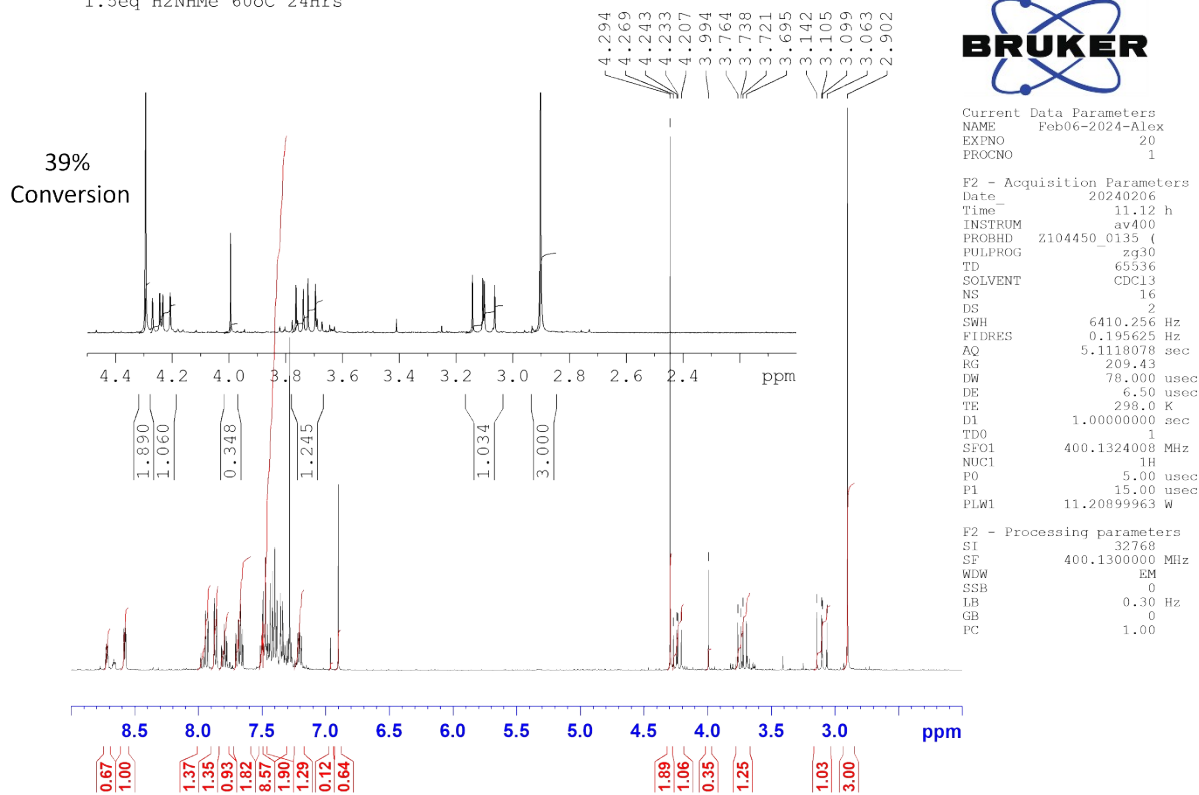



Eq. Screen: 4.0 eq. H<sub>2</sub>NNHMe

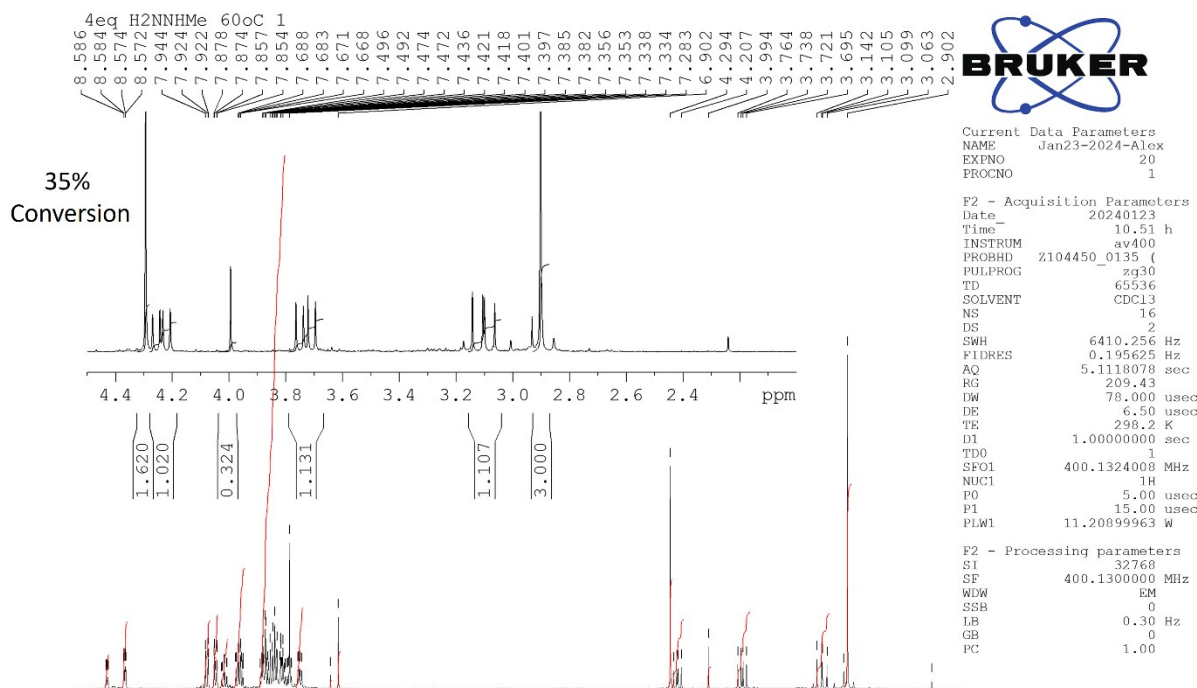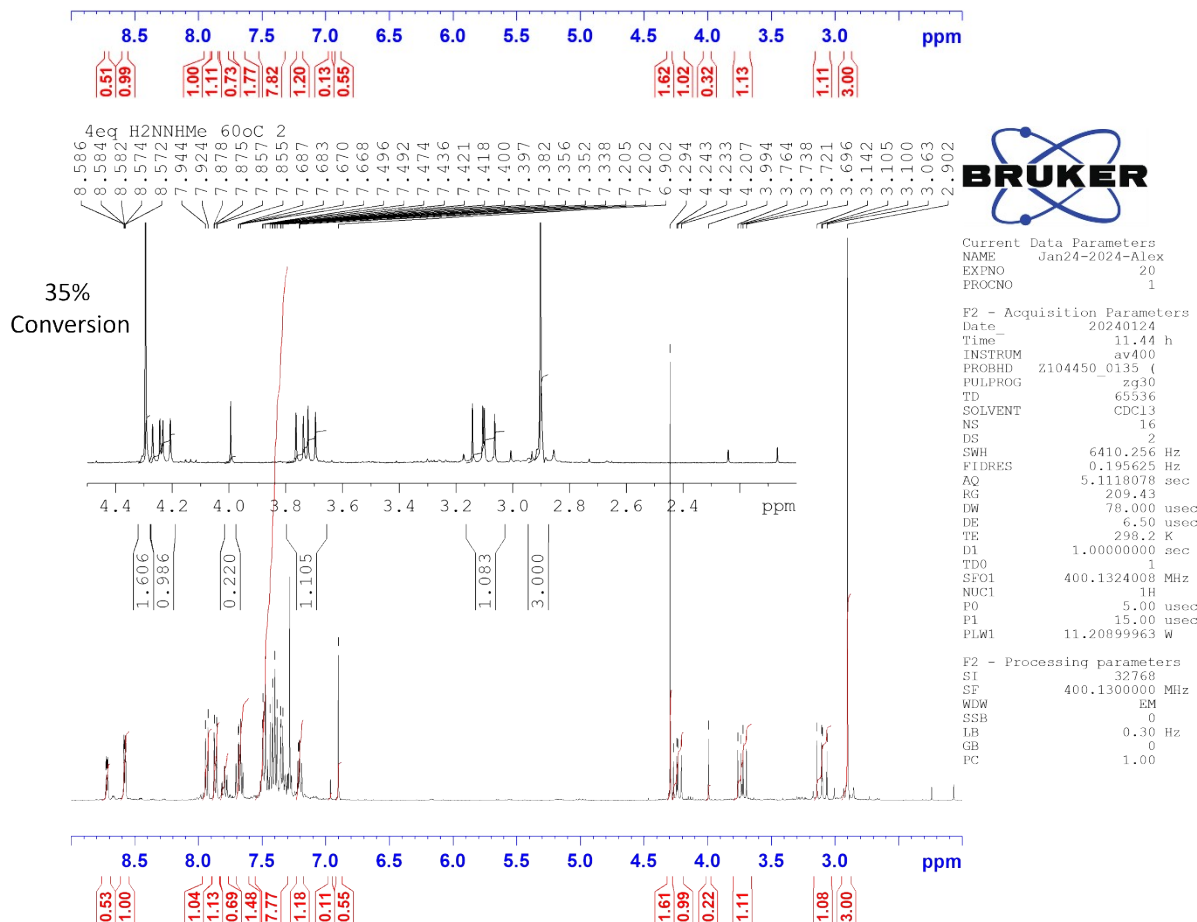

Eq. Screen: 16.0 eq. H<sub>2</sub>NNHMe

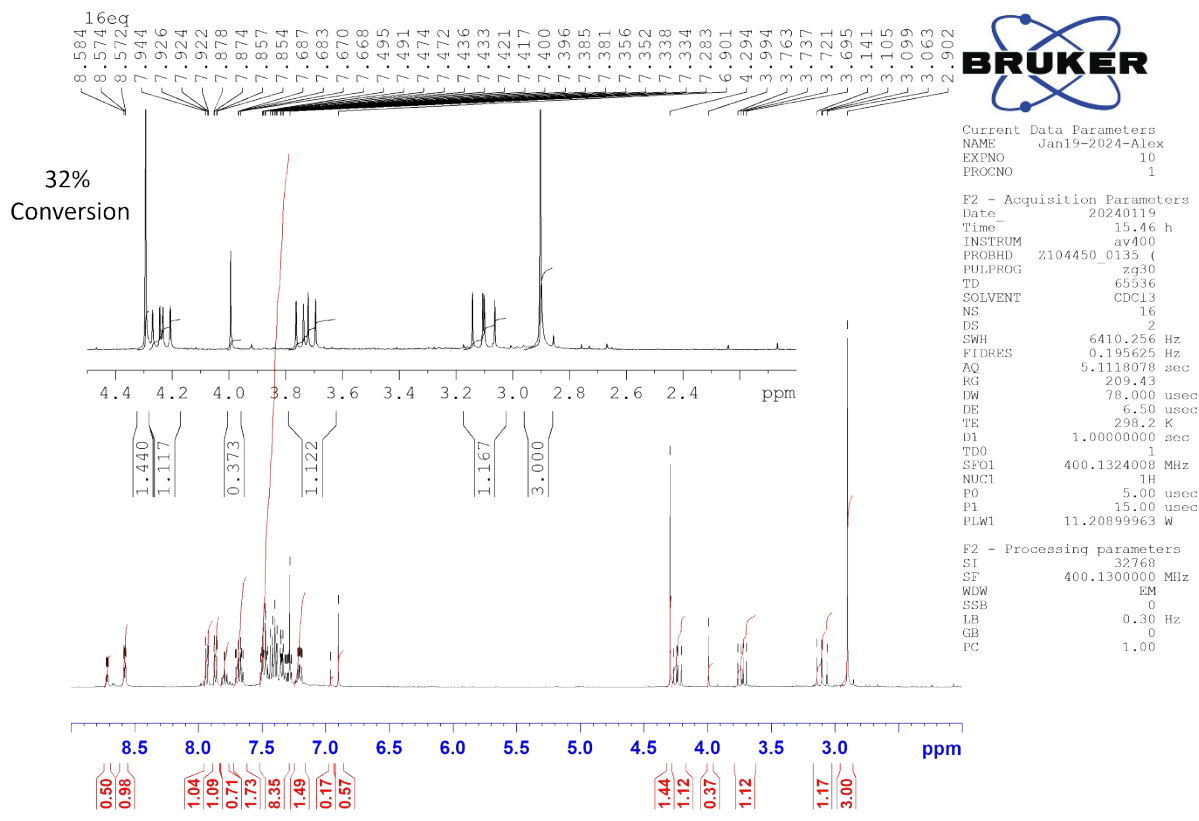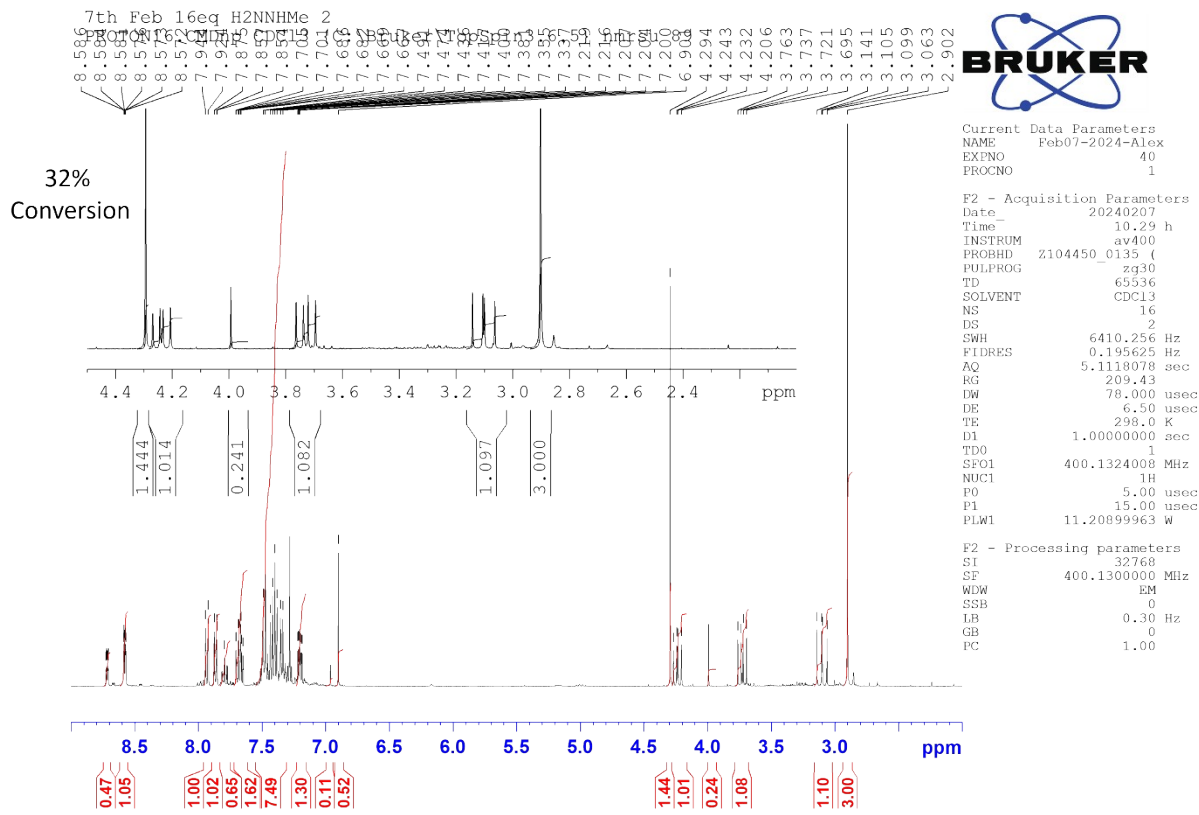

# Oxidant Screen: MnO<sub>2</sub>

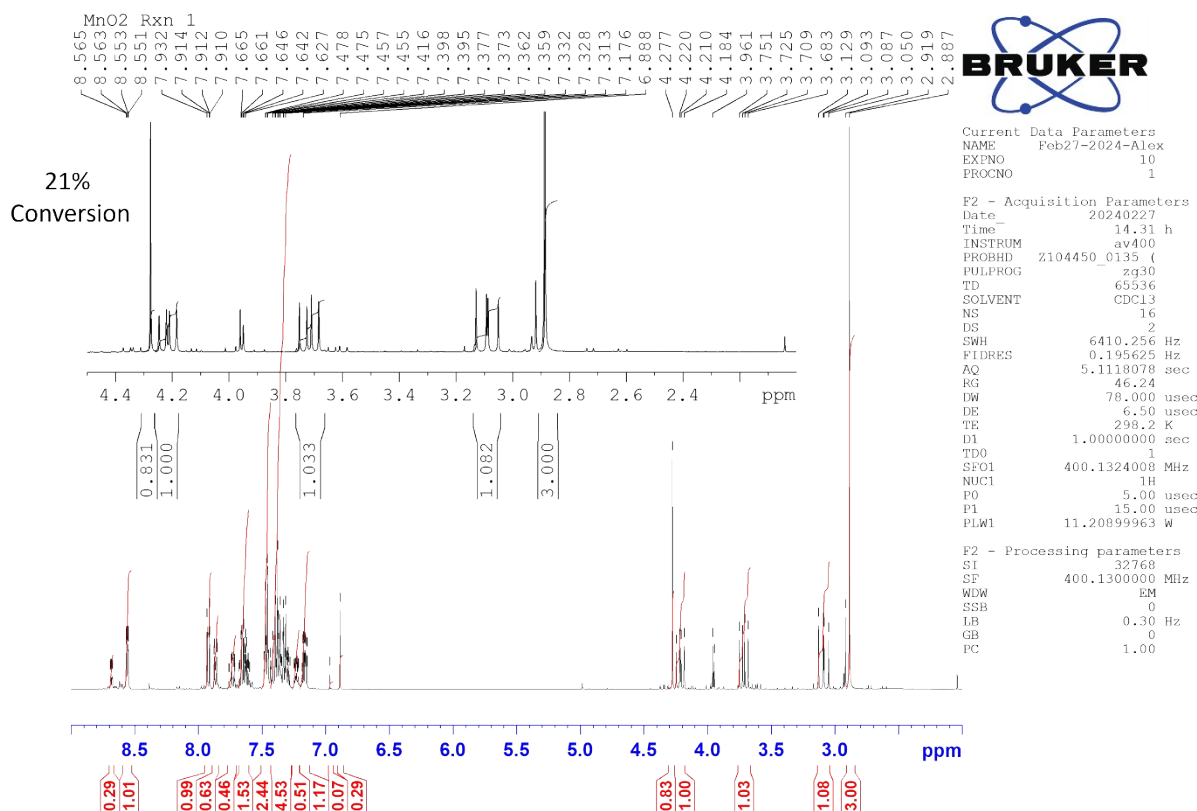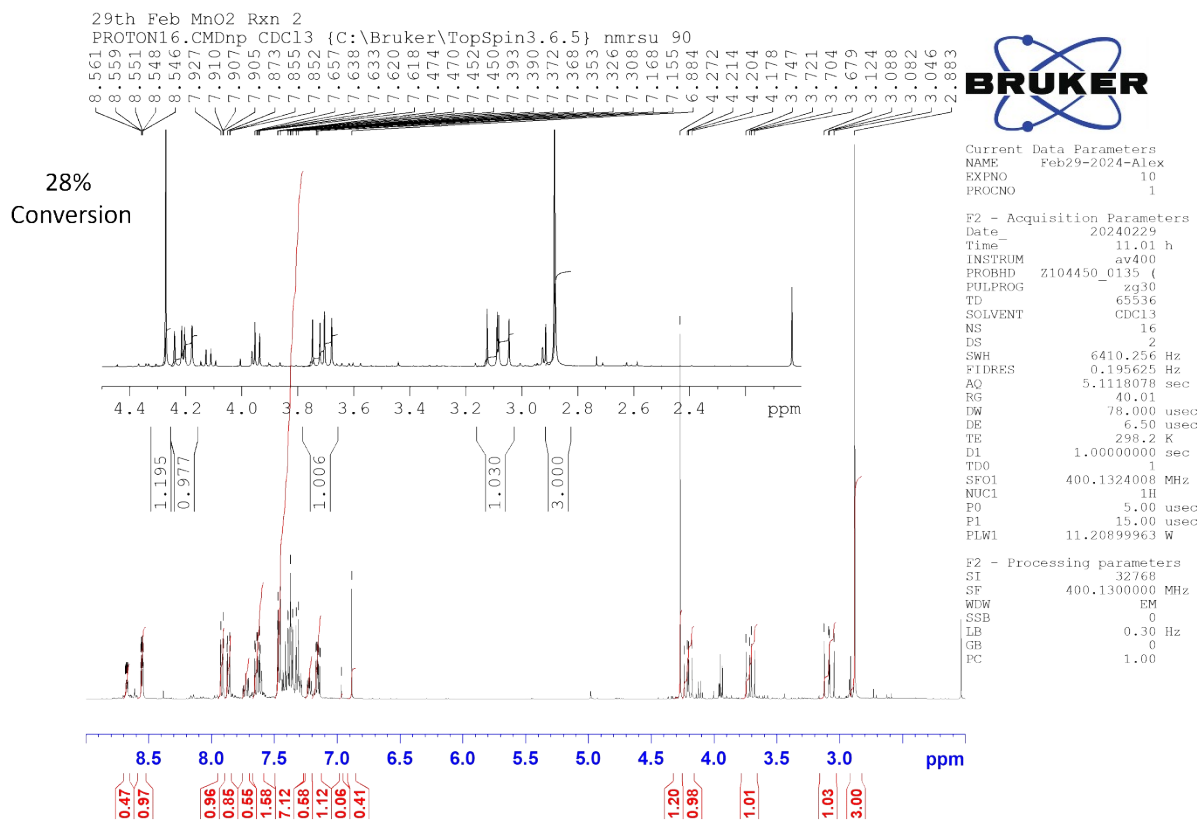

# Oxidant Screen: FeCl<sub>3</sub>

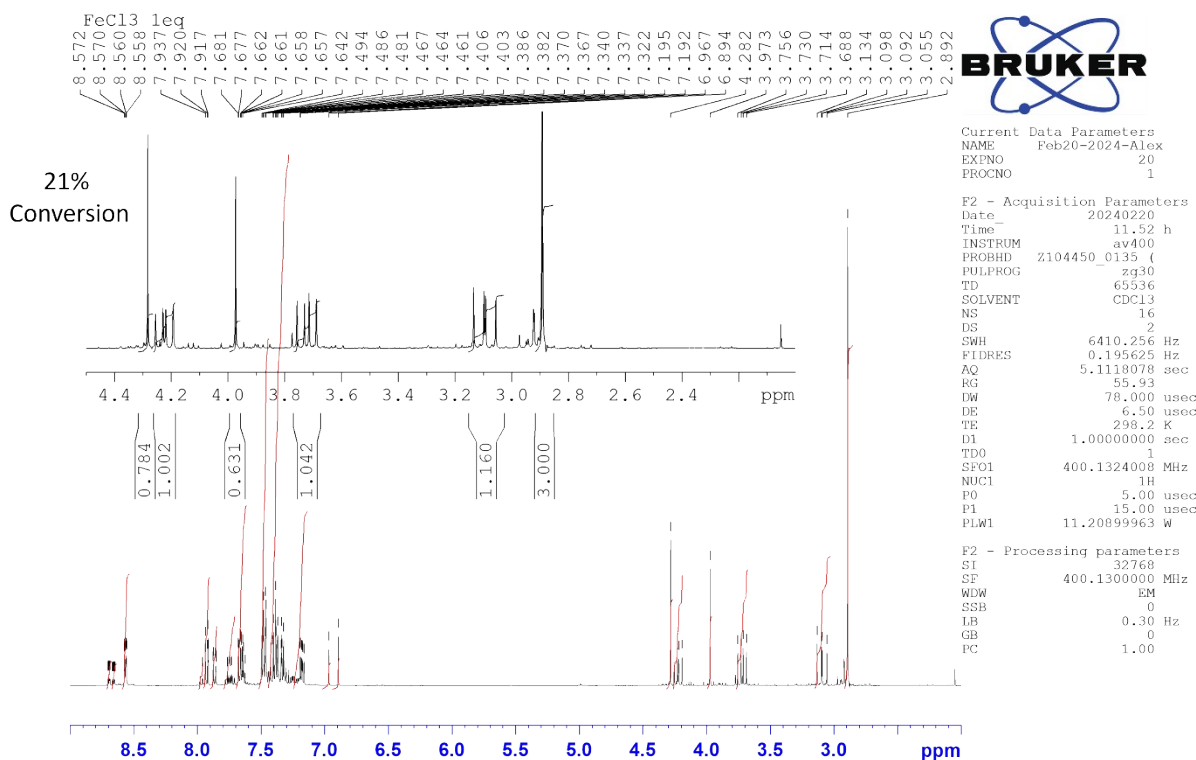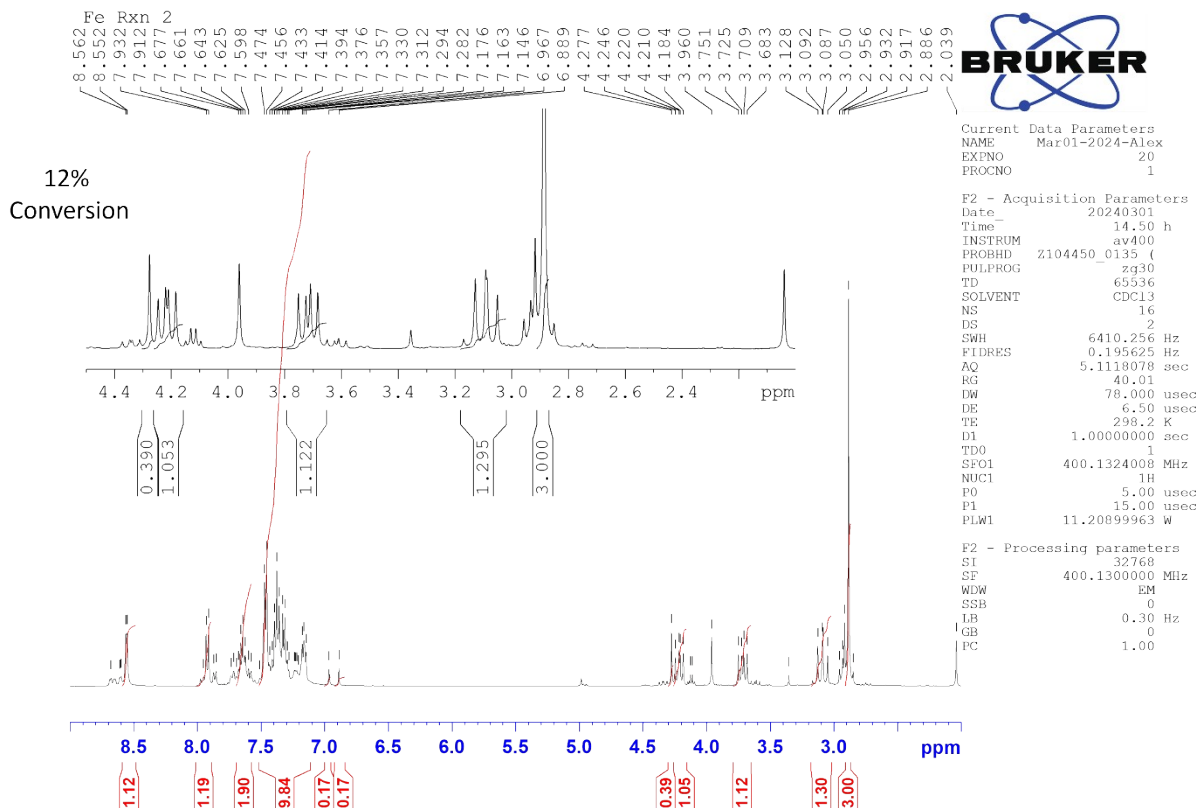

# Oxidant Screen: CoCl<sub>2</sub>

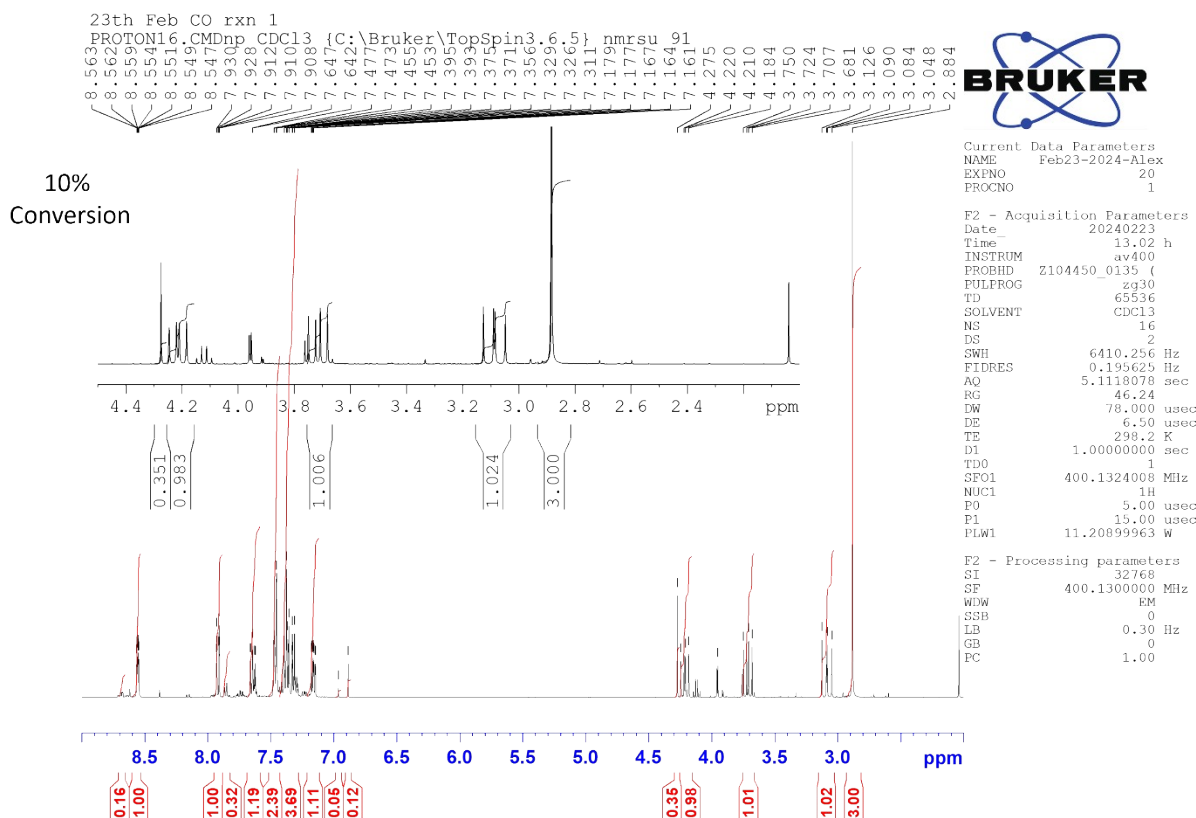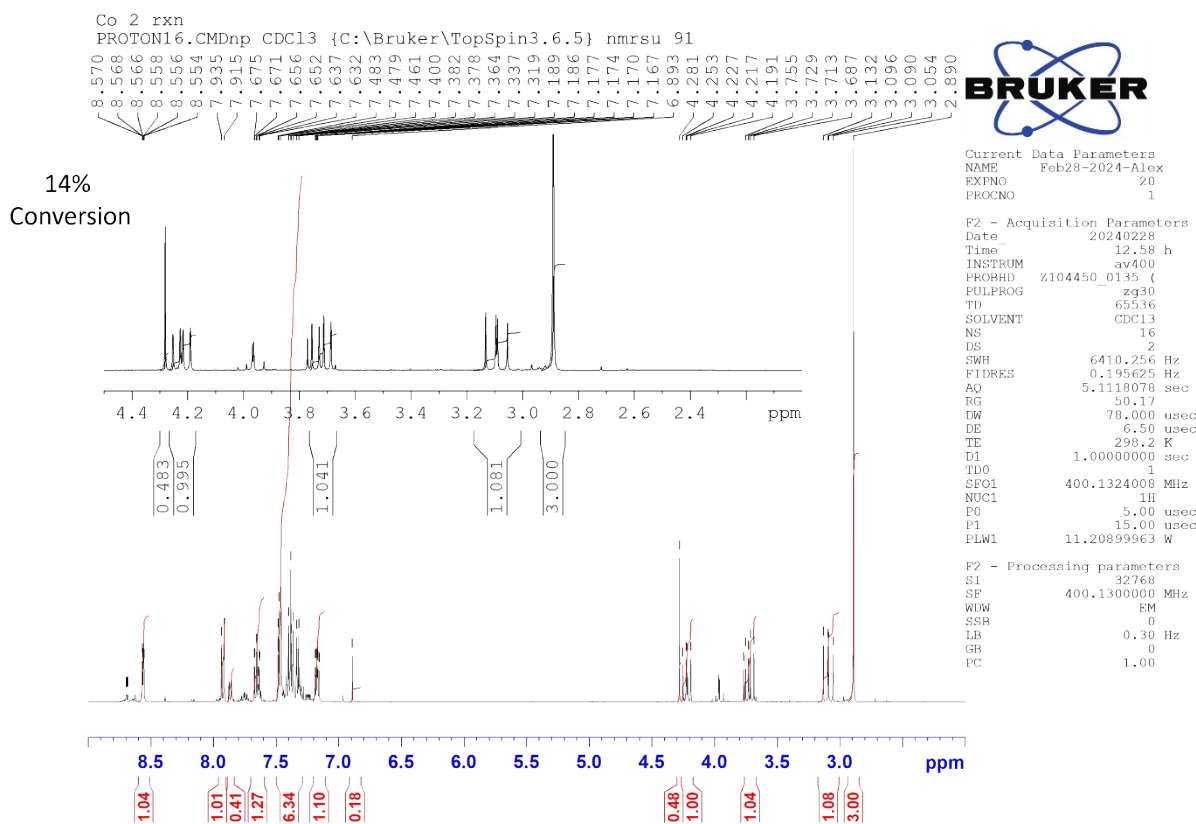

# Oxidant Screen: NiCl<sub>2</sub>

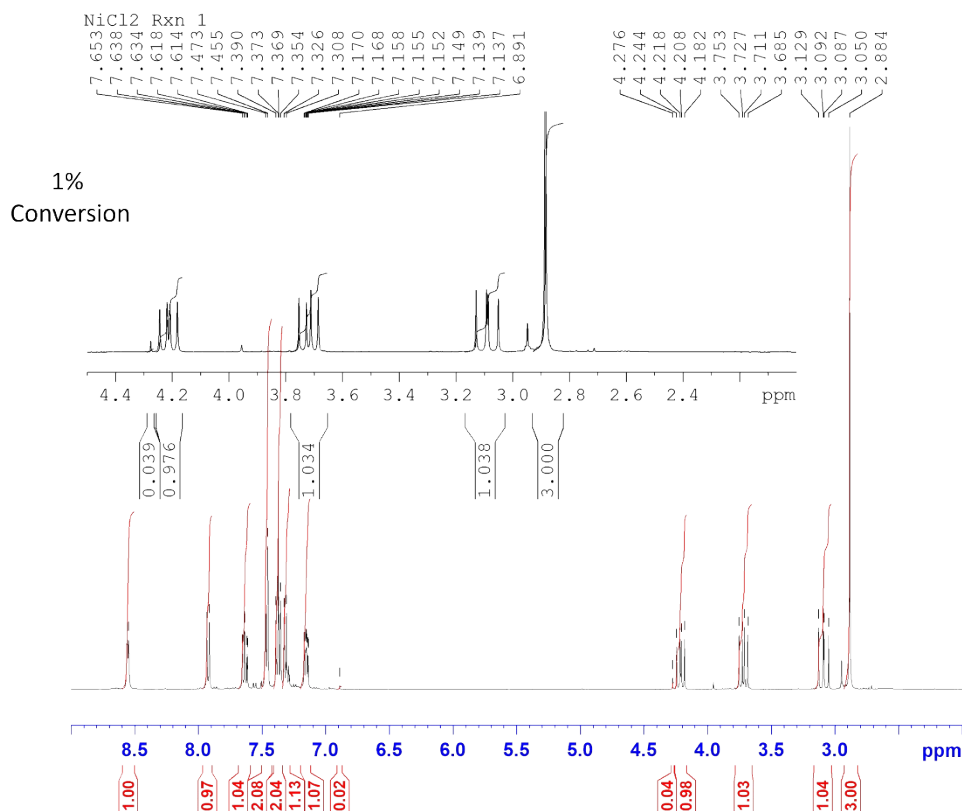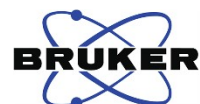

Current Data Parameters  
 NAME Feb27-2024-Alex  
 EXPNO 20  
 PROCNO 1

F2 - Acquisition Parameters  
 Date 20240227  
 Time 14.37 h  
 INSTRUM av400  
 PROBHD Z104450\_0135 (  
 PULPROG zg30  
 TD 65536  
 SOLVENT CDCl3  
 NS 16  
 DS 2  
 SWH 6410.256 Hz  
 FIDRES 0.195625 Hz  
 AQ 5.1118078 sec  
 RG 35.24  
 RW 78.000 usec  
 DE 6.50 usec  
 TE 298.2 K  
 D1 1.00000000 sec  
 TDO 1  
 SFO1 400.1324008 MHz  
 NUC1 1H  
 PO 5.00 usec  
 P1 15.00 usec  
 PLW1 11.20899963 W

F2 - Processing parameters  
 SI 32768  
 SF 400.1300000 MHz  
 WDW EM  
 SSB 0  
 LB 0.30 Hz  
 GB 0  
 PC 1.00

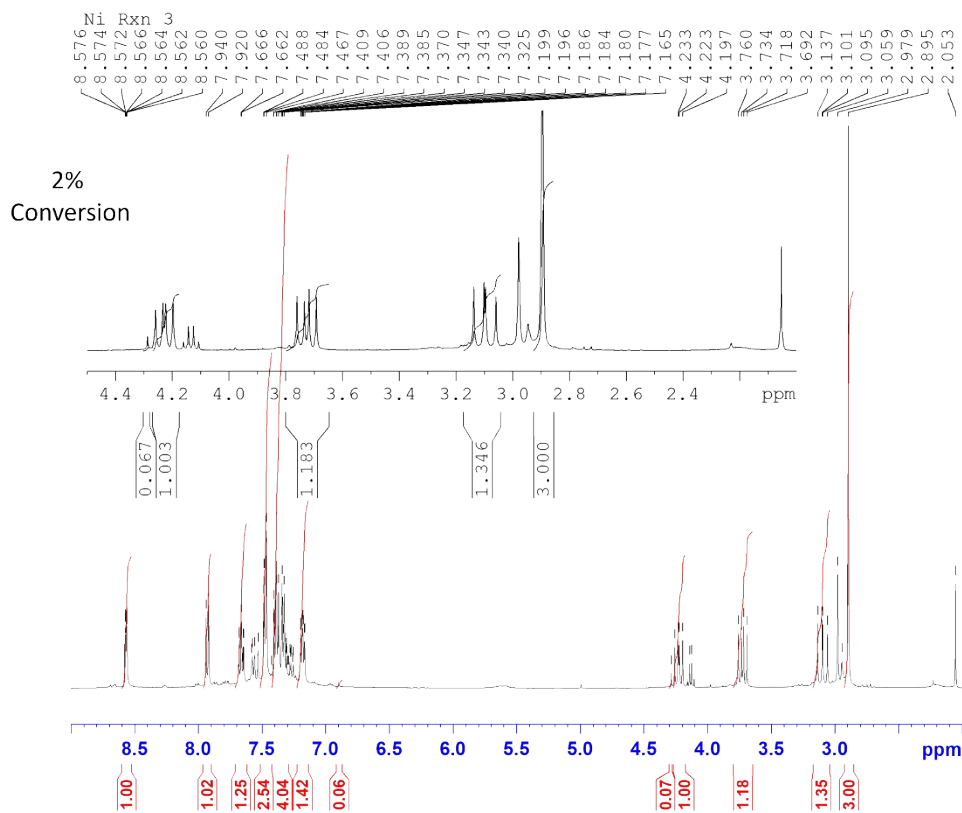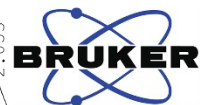

Current Data Parameters  
 NAME Mar05-2024-Alex  
 EXPNO 20  
 PROCNO 1

F2 - Acquisition Parameters  
 Date 20240305  
 Time 13.29 h  
 INSTRUM av400  
 PROBHD Z104450\_0135 (  
 PULPROG zg30  
 TD 65536  
 SOLVENT CDCl3  
 NS 16  
 DS 2  
 SWH 6410.256 Hz  
 FIDRES 0.195625 Hz  
 AQ 5.1118078 sec  
 RG 55.93  
 DW 78.000 usec  
 DE 6.50 usec  
 TE 298.2 K  
 D1 1.00000000 sec  
 TDO 1  
 SFO1 400.1324008 MHz  
 NUC1 1H  
 PO 5.00 usec  
 P1 15.00 usec  
 PLW1 11.20899963 W

F2 - Processing parameters  
 SI 32768  
 SF 400.1300000 MHz  
 WDW EM  
 SSB 0  
 LB 0.30 Hz  
 GB 0  
 PC 1.00

# Oxidant Screen: CuCl<sub>2</sub>

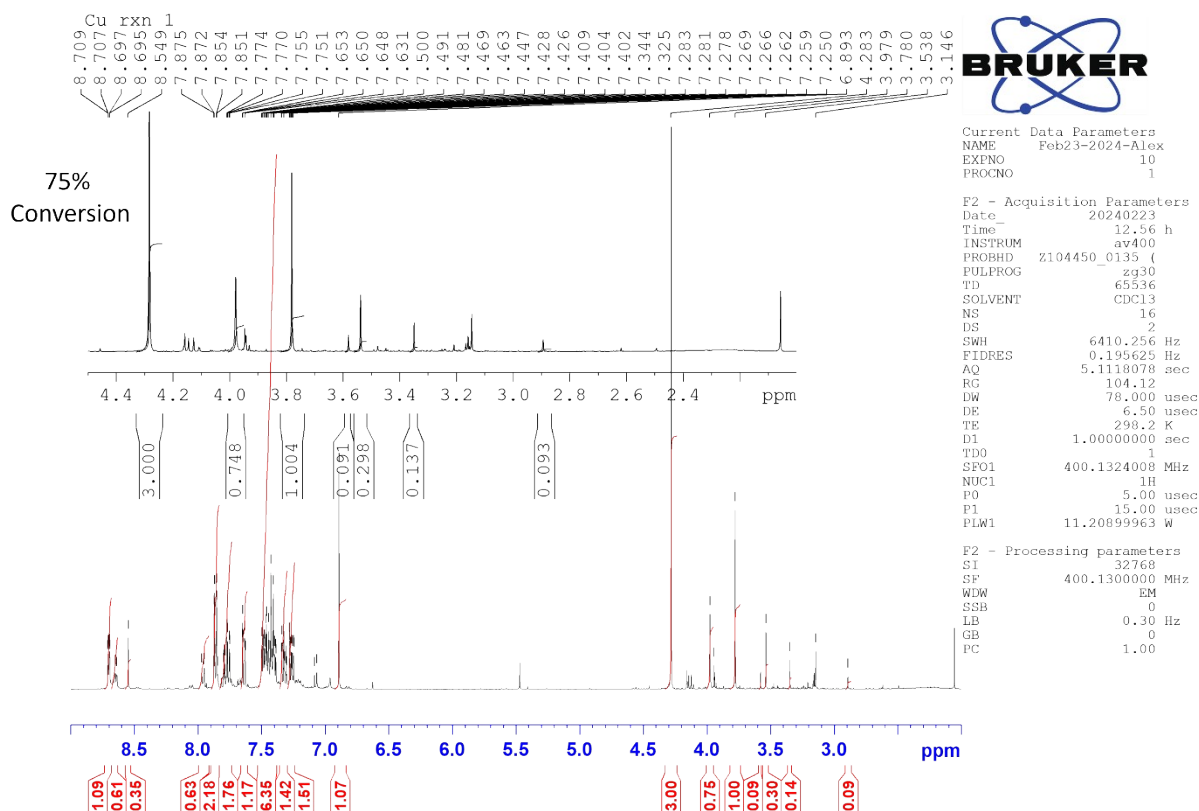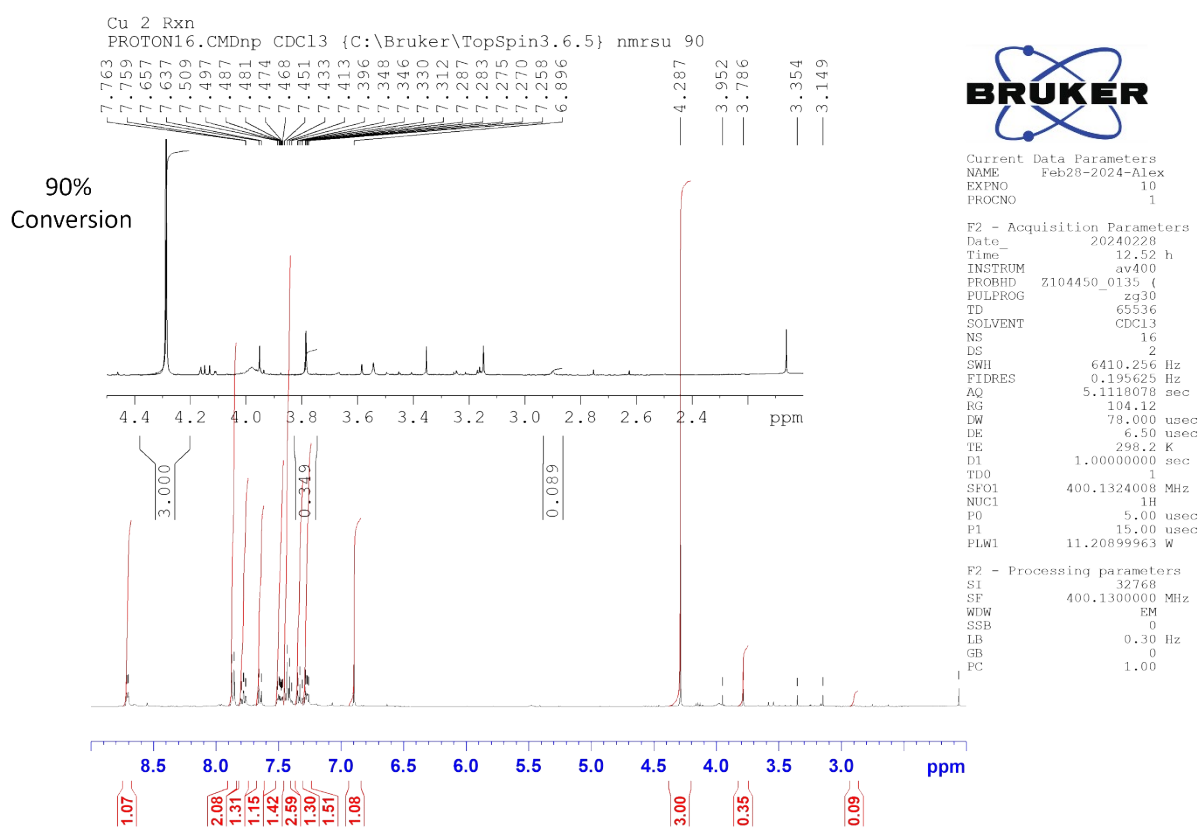

# Oxidant Screen: ZnCl<sub>2</sub>

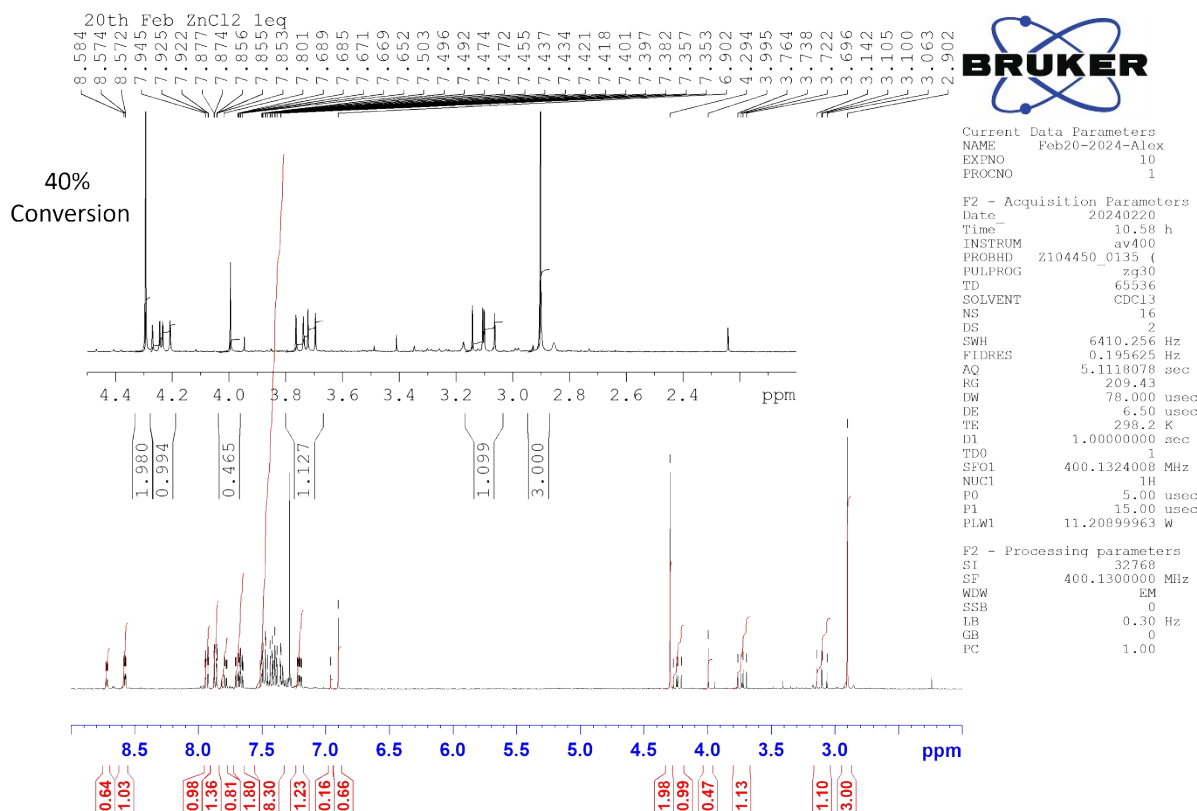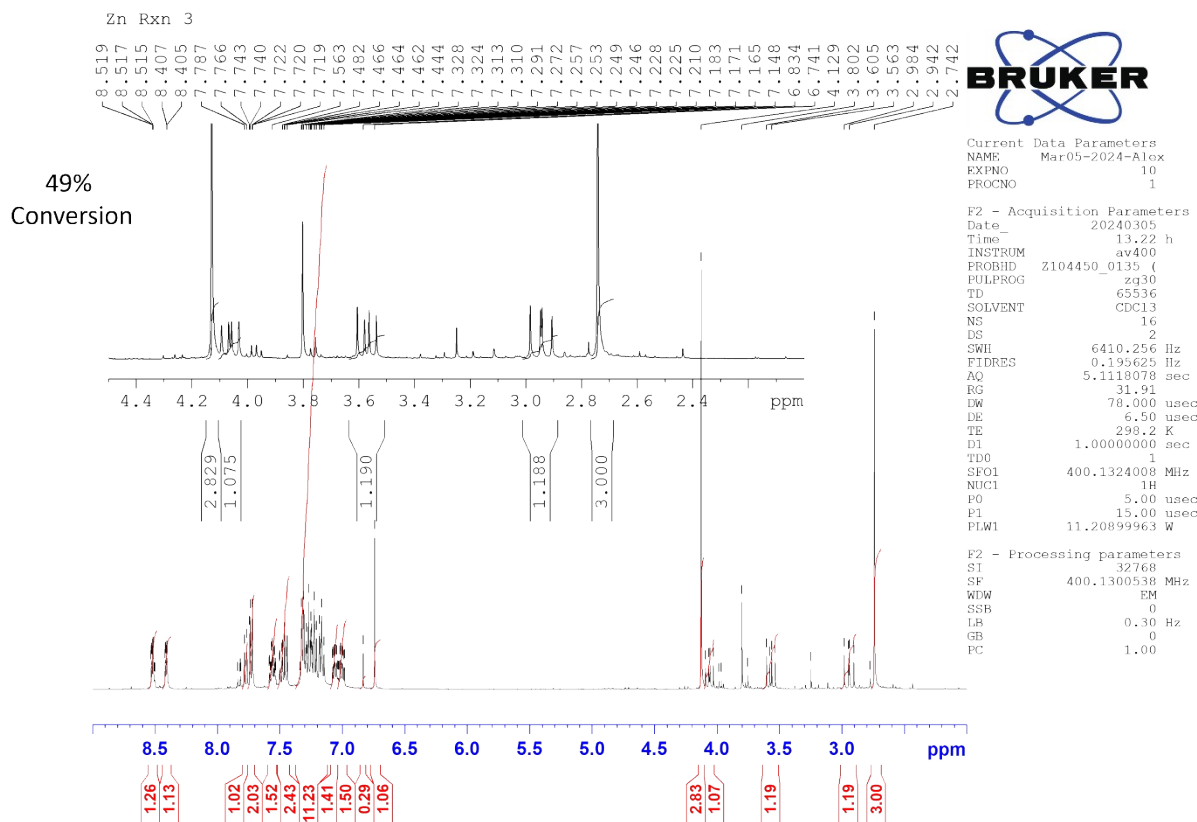



# Copper Salts: CuSO<sub>4</sub>

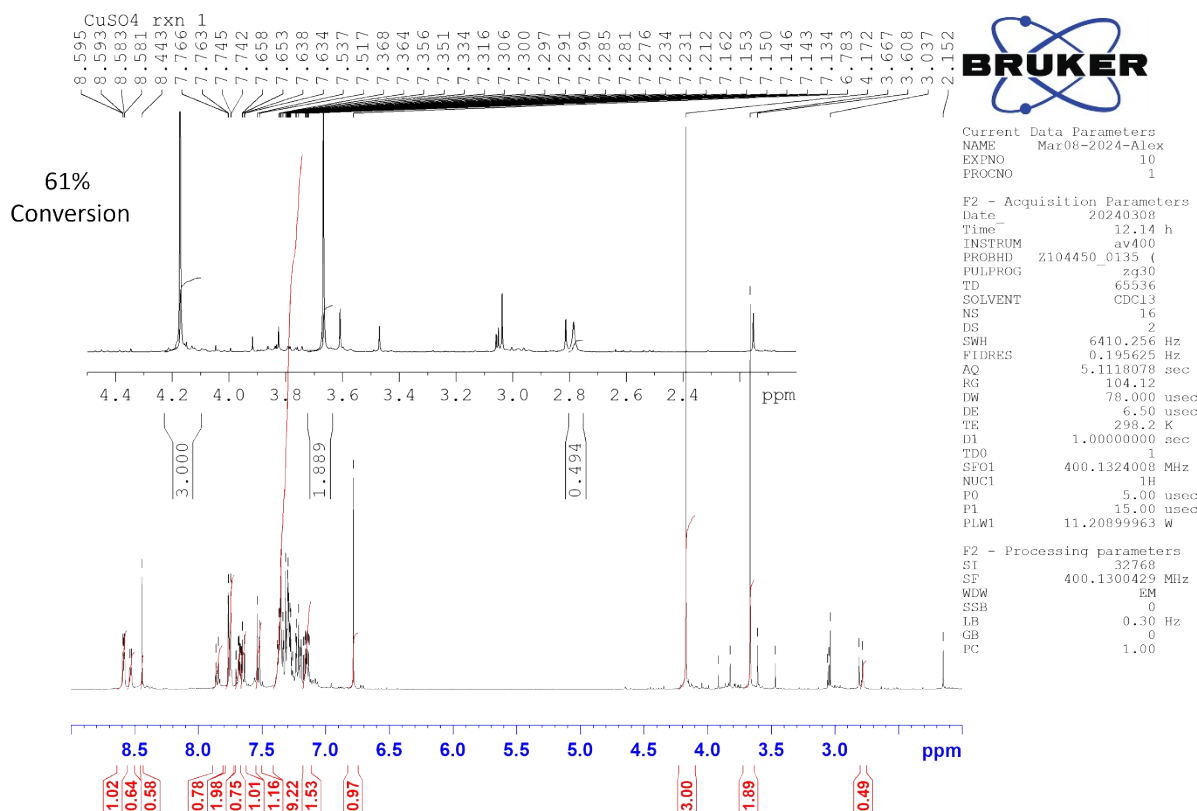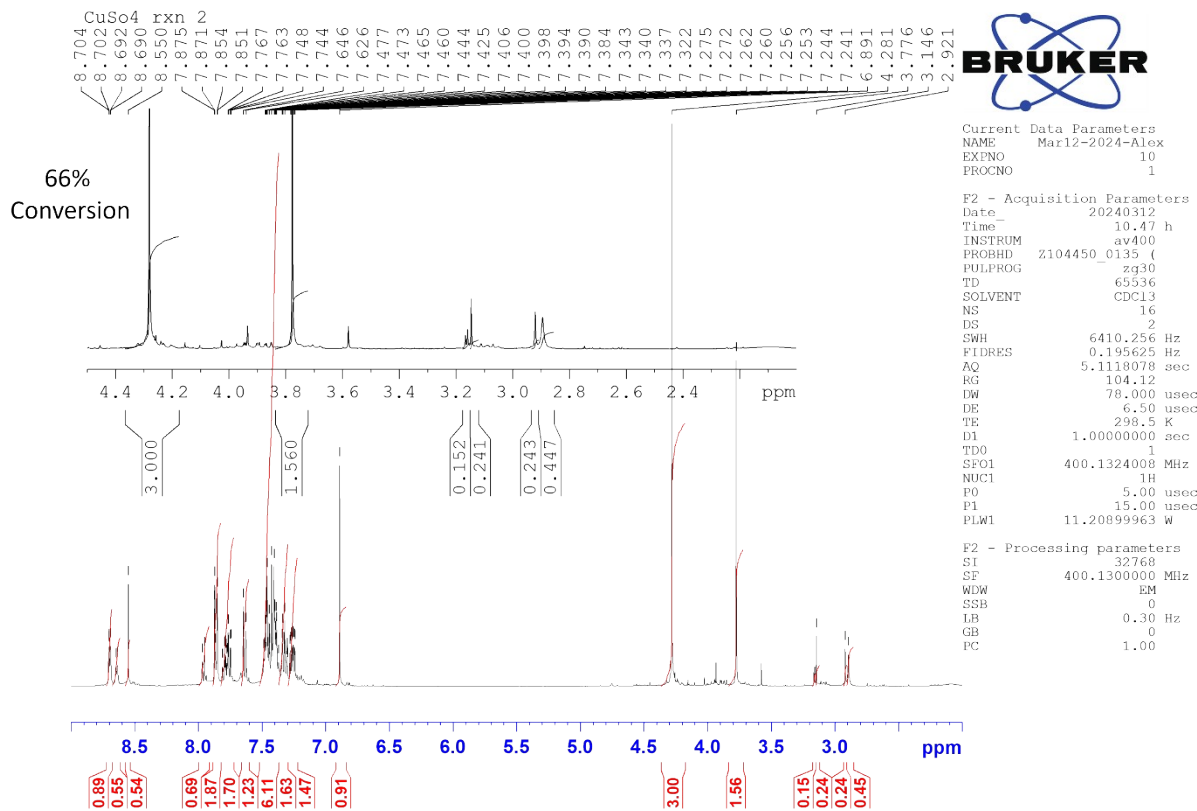

# Copper Salts: Cu(OAc)<sub>2</sub>

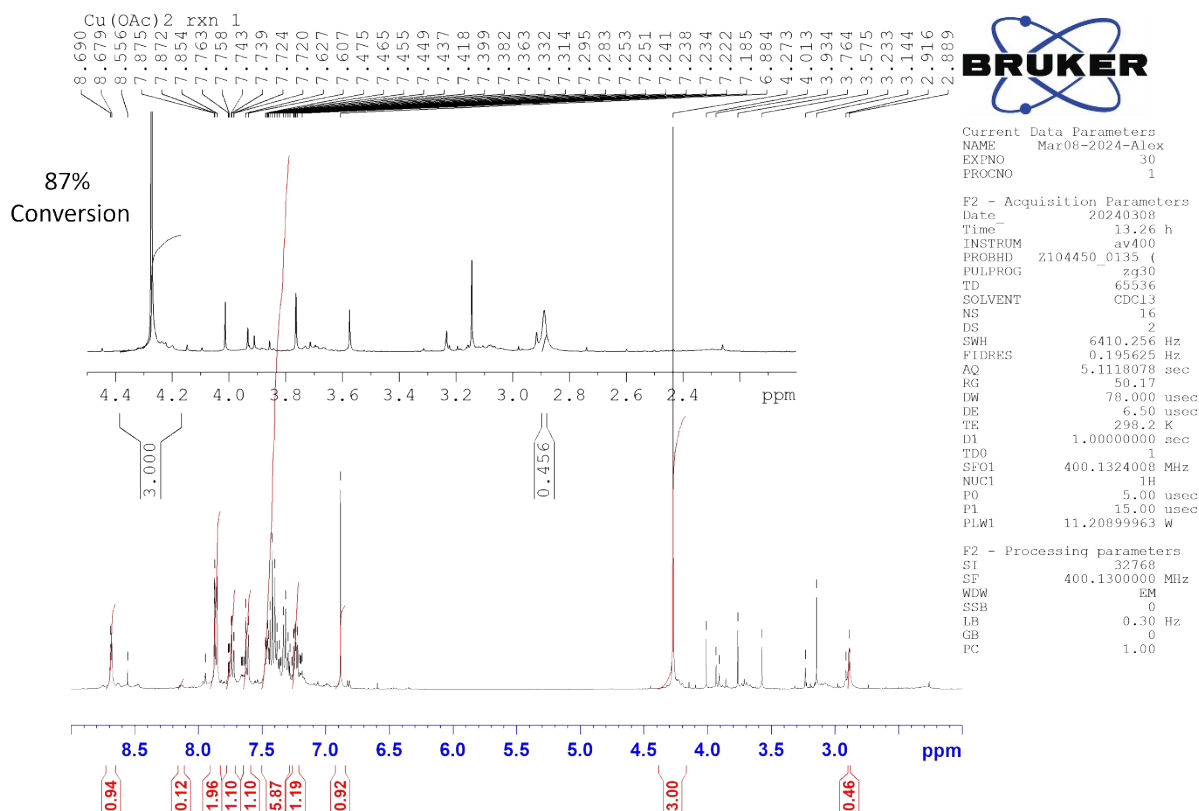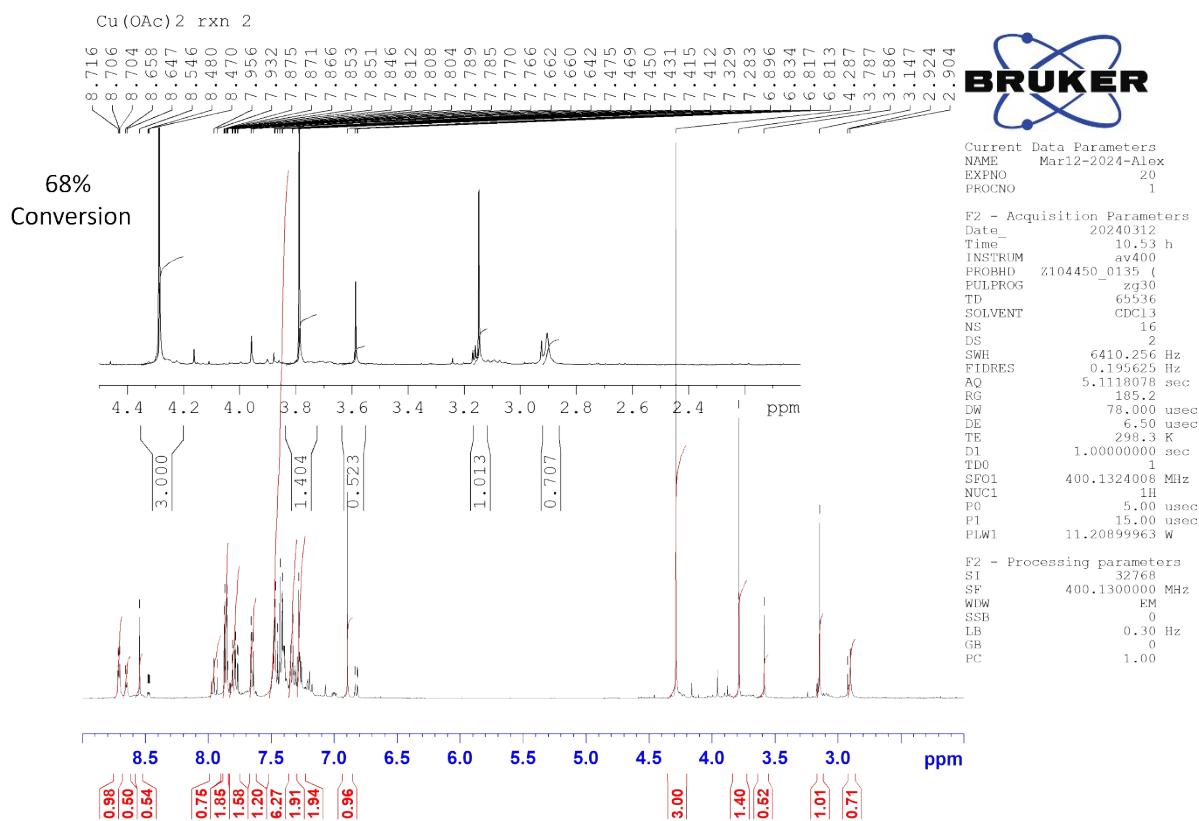



# Copper Salts: 0.25eq. CuCl<sub>2</sub>

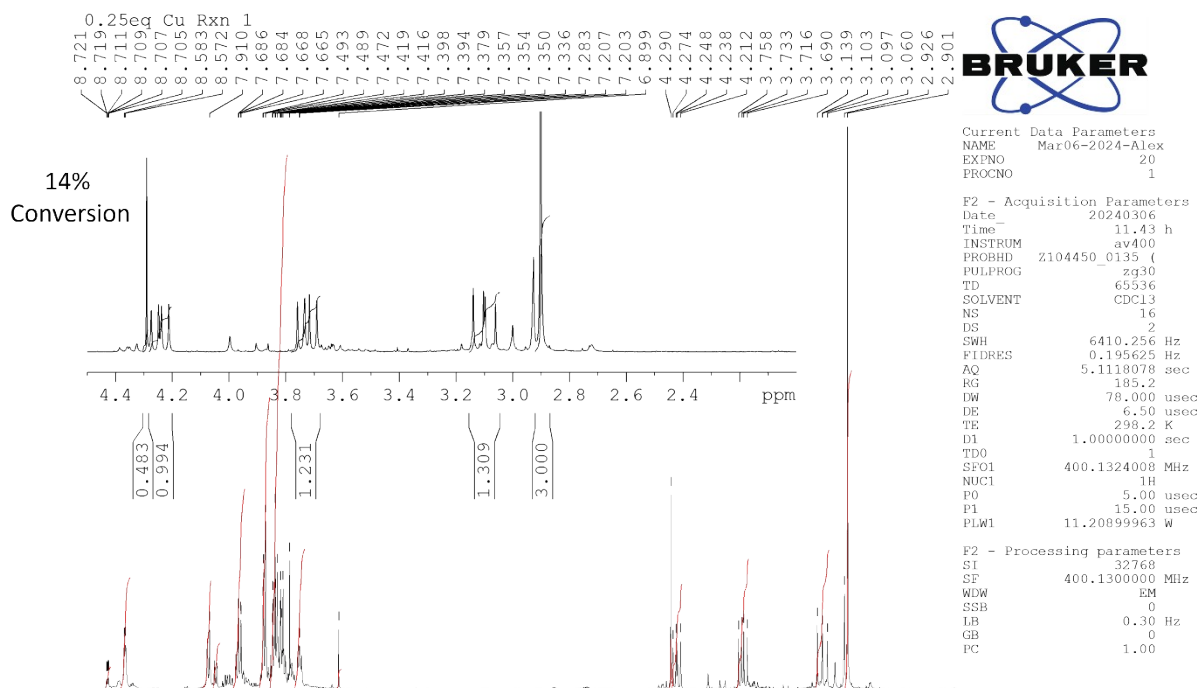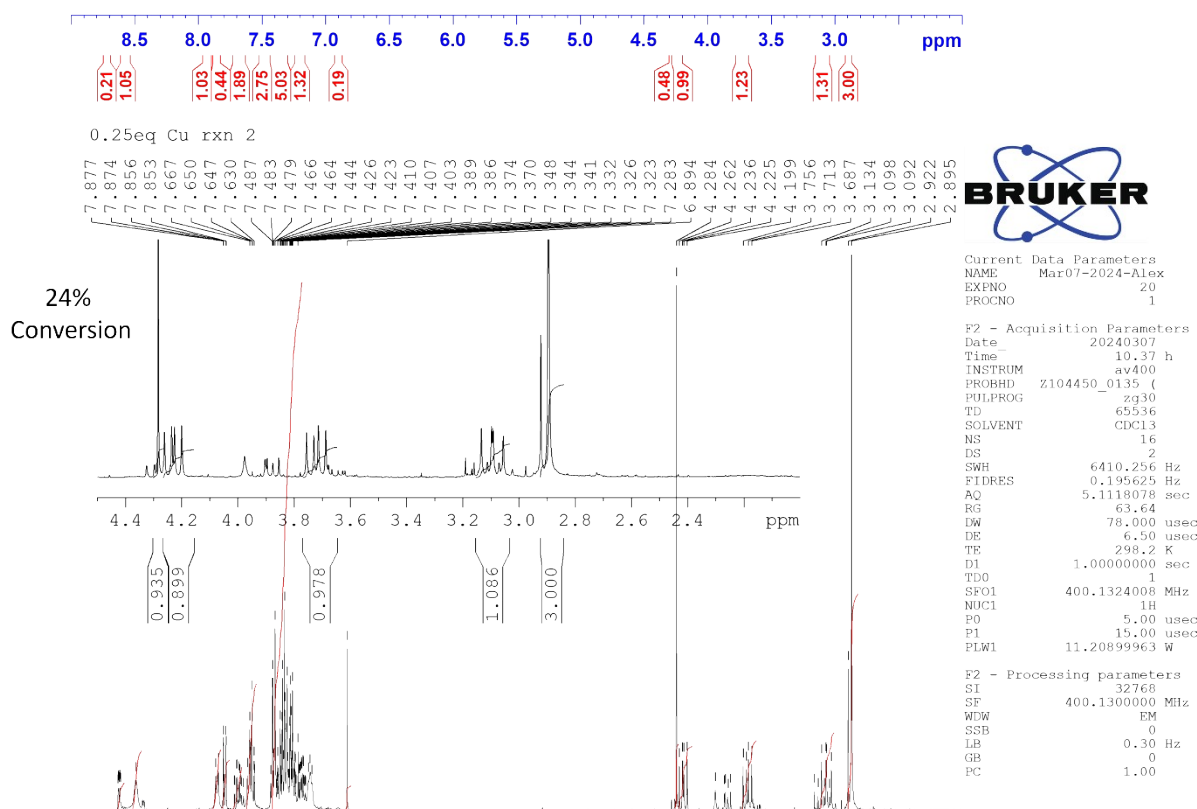

# UV/Vis Assays

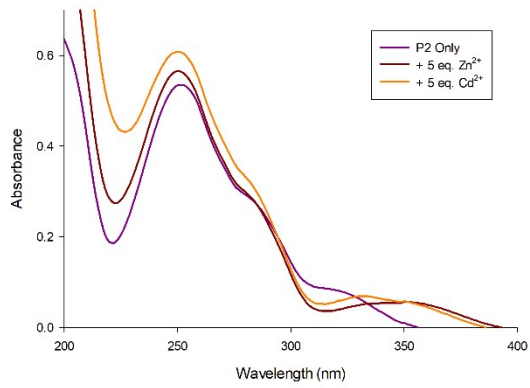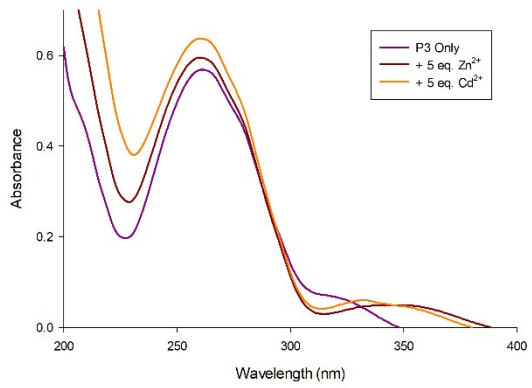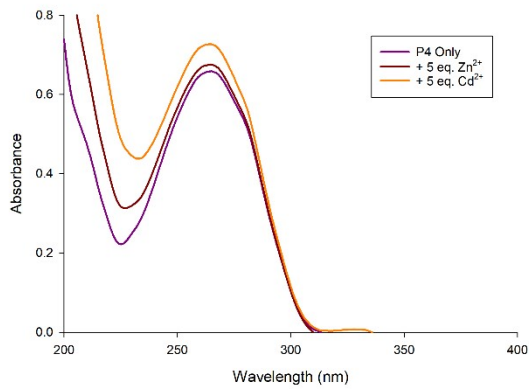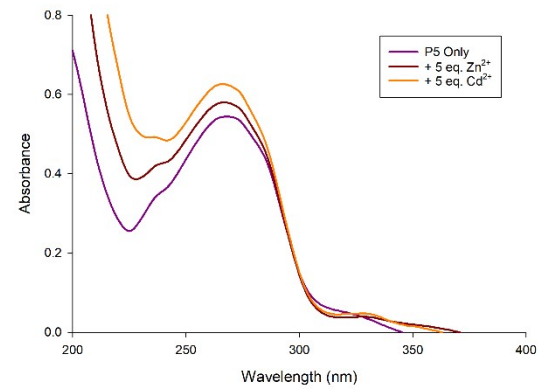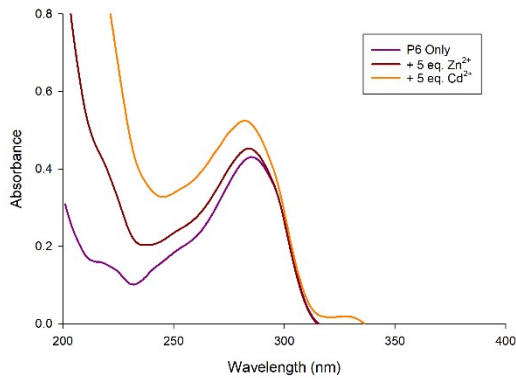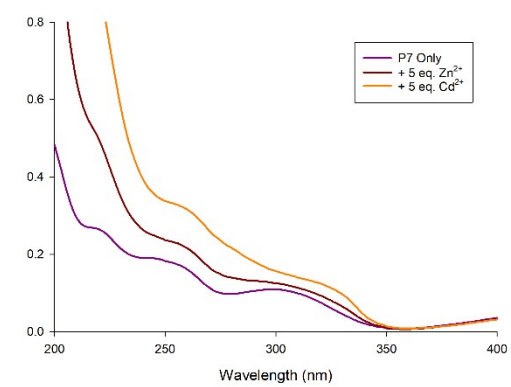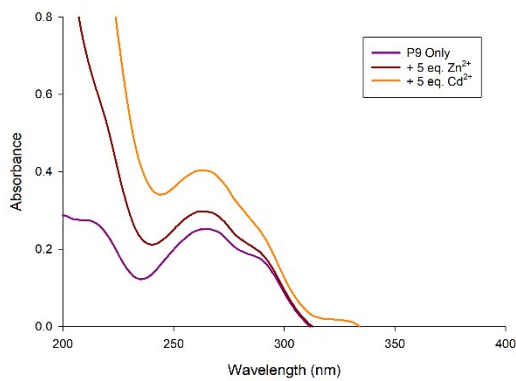

# LC-MS Studies

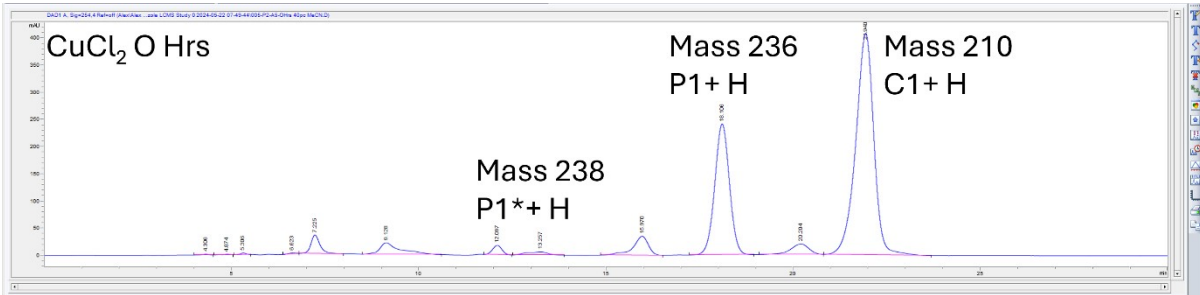

| #  | Time Type | Area  | Height | Width  | Area% | Symmetry |
|----|-----------|-------|--------|--------|-------|----------|
| 1  | 4.261     | 22.8  | 1.8    | 0.1211 | 0.021 | 0.471    |
| 2  | 4.924     | 22.9  | 1.1    | 0.1428 | 0.024 | 1.711    |
| 3  | 5.291     | 20.2  | 1.9    | 0.1071 | 0.020 | 1.511    |
| 4  | 6.621     | 21.9  | 1.7    | 0.151  | 0.021 | 1.561    |
| 5  | 7.291     | 21.9  | 1.1    | 0.1019 | 0.020 | 1.671    |
| 6  | 8.121     | 21.1  | 1.1    | 0.1019 | 0.020 | 1.16     |
| 7  | 10.291    | 202.2 | 17.2   | 0.2072 | 2.211 | 1.71     |
| 8  | 12.291    | 212.1 | 17.1   | 0.1951 | 2.211 | 1.71     |
| 9  | 15.291    | 222.1 | 17.1   | 0.1951 | 2.211 | 1.71     |
| 10 | 18.291    | 232.1 | 17.1   | 0.1951 | 2.211 | 1.71     |
| 11 | 20.291    | 242.1 | 17.1   | 0.1951 | 2.211 | 1.71     |
| 12 | 21.291    | 252.1 | 17.1   | 0.1951 | 2.211 | 1.71     |

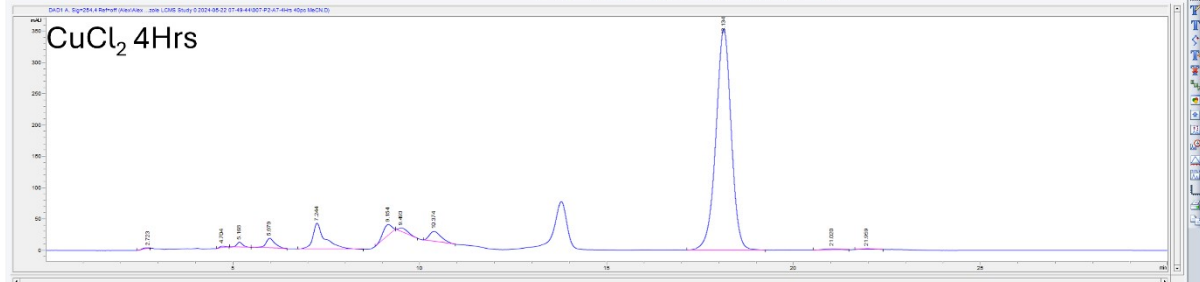

| #  | Time Type | Area    | Height | Width  | Area%  | Symmetry |
|----|-----------|---------|--------|--------|--------|----------|
| 1  | 4.261     | 22.8    | 1.8    | 0.1211 | 0.021  | 0.471    |
| 2  | 4.704     | 20.2    | 1.1    | 0.1428 | 0.020  | 0.790    |
| 3  | 5.291     | 20.2    | 1.9    | 0.1071 | 0.020  | 1.511    |
| 4  | 6.291     | 21.9    | 1.7    | 0.151  | 0.021  | 0.741    |
| 5  | 7.291     | 21.9    | 1.1    | 0.1019 | 0.020  | 0.481    |
| 6  | 8.194     | 20.6    | 1.1    | 0.1051 | 0.020  | 1.131    |
| 7  | 9.421     | 201.1   | 15.1   | 0.22   | 0.941  | 0.779    |
| 8  | 10.291    | 211.1   | 16     | 0.1991 | 0.941  | 0.801    |
| 9  | 10.124    | 10261.7 | 1011.1 | 0.1991 | 81.981 | 1.021    |
| 10 | 21.291    | 17.1    | 1.8    | 0.1111 | 0.020  | 1.291    |
| 11 | 21.919    | 24.1    | 1.4    | 0.1311 | 0.021  | 1.8      |

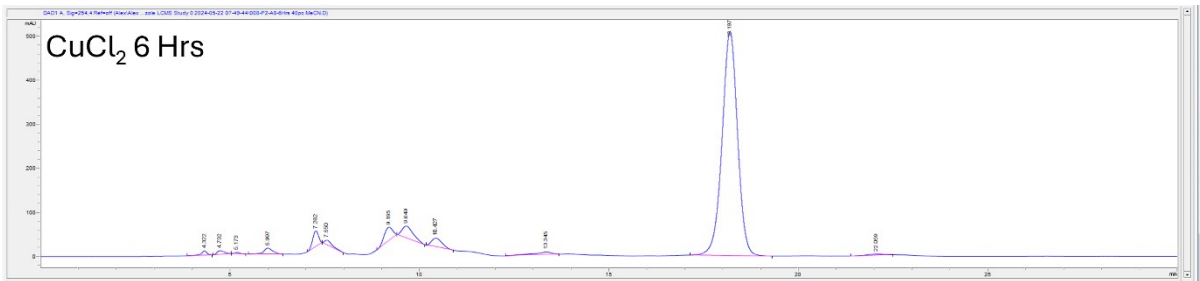

| #  | Time Type | Area    | Height | Width  | Area%  | Symmetry |
|----|-----------|---------|--------|--------|--------|----------|
| 1  | 4.261     | 22.8    | 1.8    | 0.1211 | 0.021  | 0.471    |
| 2  | 4.702     | 20.2    | 1.1    | 0.1428 | 0.020  | 0.600    |
| 3  | 5.291     | 20.2    | 1.9    | 0.1071 | 0.020  | 0.871    |
| 4  | 5.917     | 20.2    | 1.9    | 0.1071 | 0.020  | 0.801    |
| 5  | 7.262     | 21.8    | 1.7    | 0.1511 | 0.021  | 1.191    |
| 6  | 7.191     | 19.9    | 1.1    | 0.1019 | 0.020  | 0.511    |
| 7  | 8.194     | 172.1   | 14.1   | 0.1977 | 3.754  | 1.541    |
| 8  | 8.441     | 148.1   | 14.1   | 0.2021 | 3.191  | 1.528    |
| 9  | 10.127    | 191.1   | 15     | 0.2111 | 3.181  | 0.612    |
| 10 | 13.191    | 212.1   | 17.1   | 0.1991 | 3.751  | 1.59     |
| 11 | 18.197    | 14188.1 | 1381.1 | 0.1991 | 84.191 | 1.031    |
| 12 | 21.019    | 17.1    | 1.1    | 0.1071 | 0.020  | 1.251    |

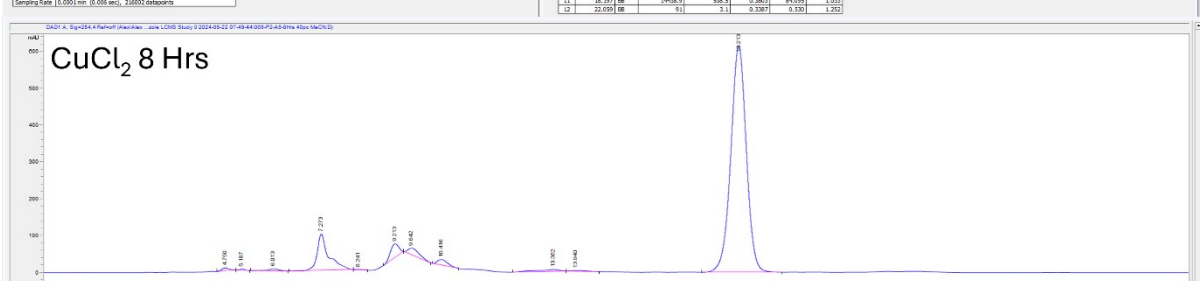

| #  | Time Type | Area   | Height | Width  | Area%  | Symmetry |
|----|-----------|--------|--------|--------|--------|----------|
| 1  | 4.701     | 191.1  | 15.1   | 0.1991 | 0.517  | 0.784    |
| 2  | 5.197     | 19.1   | 1.1    | 0.1071 | 0.020  | 0.741    |
| 3  | 6.019     | 124.1  | 10.1   | 0.1401 | 0.501  | 1.134    |
| 4  | 7.079     | 188.1  | 15.1   | 0.191  | 0.521  | 0.511    |
| 5  | 8.241     | 141.1  | 11.1   | 0.1111 | 0.501  | 0.391    |
| 6  | 8.213     | 194.1  | 15.1   | 0.1924 | 0.501  | 1.414    |
| 7  | 8.441     | 194.1  | 15.1   | 0.1924 | 0.501  | 0.411    |
| 8  | 10.146    | 181.1  | 14.1   | 0.2191 | 0.501  | 0.611    |
| 9  | 13.191    | 191.1  | 15.1   | 0.191  | 0.501  | 1.511    |
| 10 | 13.191    | 41.1   | 3.1    | 0.1191 | 0.201  | 0.371    |
| 11 | 18.219    | 1711.1 | 131.1  | 0.191  | 81.671 | 1.041    |

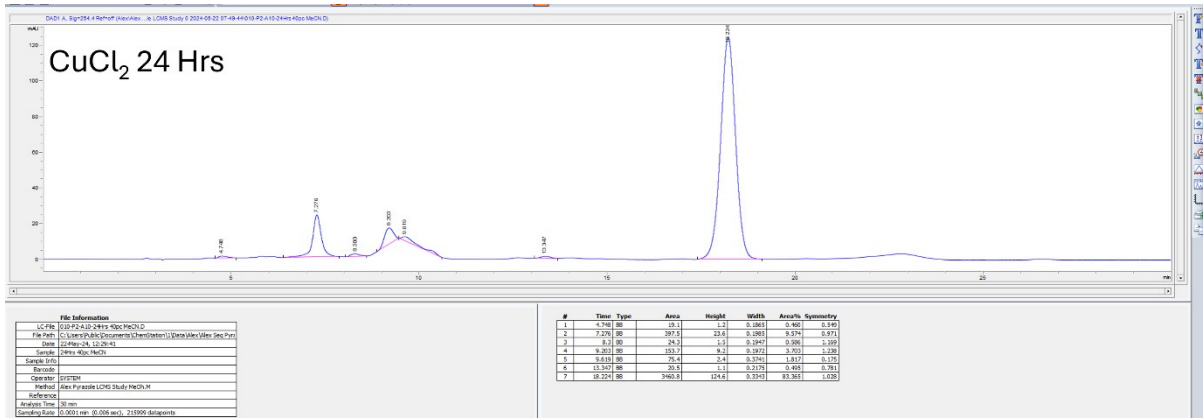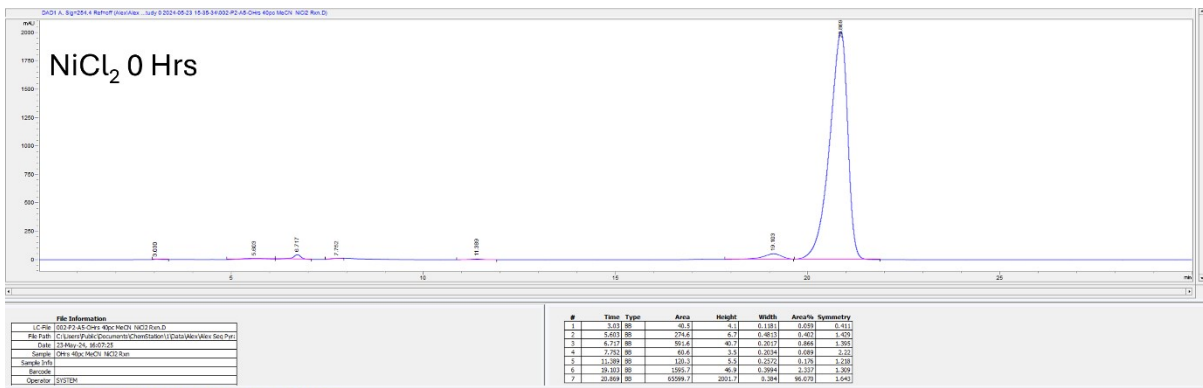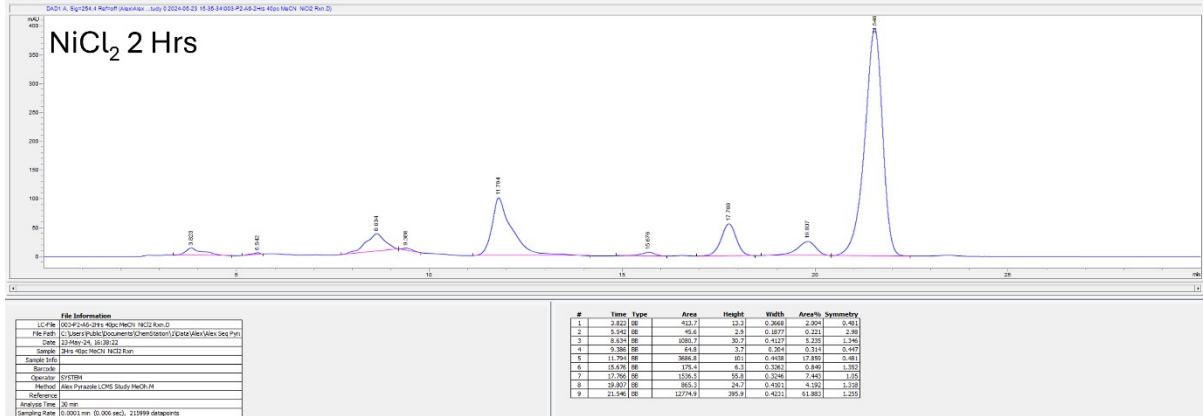

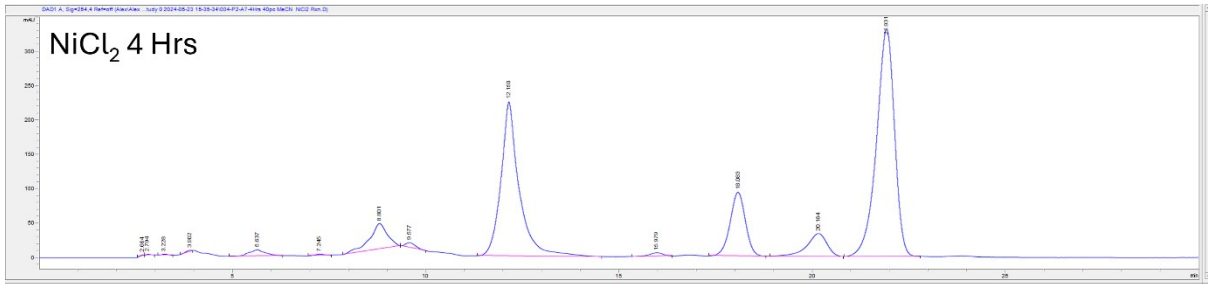

**File Information**

|               |                                                                  |
|---------------|------------------------------------------------------------------|
| LC File       | D:\P2-41-814-814-NiCl2-NiCl2-Run.D                               |
| File Path     | C:\Users\Public\Documents\ChemStation\1\Data\Views\Views Sec.Fpr |
| Date          | 23 May 24, 17:09:21                                              |
| Sample        | 814-NiCl2-NiCl2-Run                                              |
| Sample ID(s)  |                                                                  |
| Operator      | JPT/SM                                                           |
| Method        | Met Purasole LCHS Study Meth.M                                   |
| Reference     |                                                                  |
| Analysis Time | 30 min                                                           |
| Sampling Rate | 0.001 min @ 0.06 sec @ 240000 datapoints                         |

| #  | Time   | Type | Area    | Height | Width  | Area%  | Symmetry |
|----|--------|------|---------|--------|--------|--------|----------|
| 1  | 0.5681 | BB   | 10.21   | 1.21   | 0.0923 | 0.001  | 0.2011   |
| 2  | 2.794  | BB   | 8.8     | 1.4    | 0.0773 | 0.036  | 0.287    |
| 3  | 3.238  | BB   | 61.7    | 1.8    | 0.106  | 0.276  | 0.763    |
| 4  | 3.922  | BB   | 15.8    | 1.7    | 0.135  | 0.043  | 4.732    |
| 5  | 6.674  | BB   | 266.2   | 6.2    | 0.3306 | 1.101  | 1.043    |
| 6  | 12.495 | BB   | 253.9   | 21     | 0.872  | 0.764  | 0.901    |
| 7  | 8.931  | BB   | 1204.4  | 33.1   | 0.2811 | 3.076  | 1.294    |
| 8  | 9.577  | BB   | 129.7   | 2.1    | 0.1109 | 0.467  | 0.901    |
| 9  | 12.15  | BB   | 7274.4  | 224.7  | 0.4122 | 24.079 | 0.727    |
| 10 | 20.976 | BB   | 121.2   | 1.1    | 0.268  | 0.511  | 1.284    |
| 11 | 18.083 | BB   | 2938    | 33     | 0.1275 | 10.761 | 1.264    |
| 12 | 21.64  | BB   | 1108.8  | 10.7   | 0.4217 | 0.601  | 1.171    |
| 13 | 21.931 | BB   | 10787.8 | 331.4  | 0.3975 | 46.464 | 1.283    |

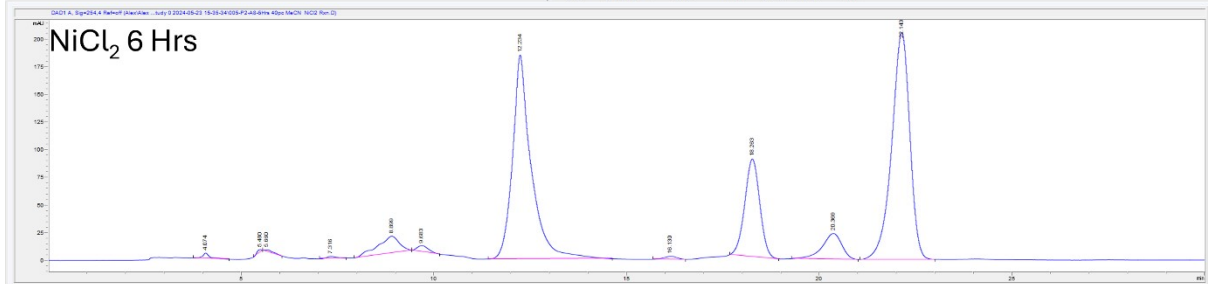

**File Information**

|               |                                                                  |
|---------------|------------------------------------------------------------------|
| LC File       | D:\P2-41-814-814-NiCl2-NiCl2-Run.D                               |
| File Path     | C:\Users\Public\Documents\ChemStation\1\Data\Views\Views Sec.Fpr |
| Date          | 23 May 24, 17:40:18                                              |
| Sample        | 814-NiCl2-NiCl2-Run                                              |
| Sample ID(s)  |                                                                  |
| Operator      | JPT/SM                                                           |
| Method        | Met Purasole LCHS Study Meth.M                                   |
| Reference     |                                                                  |
| Analysis Time | 30 min                                                           |
| Sampling Rate | 0.001 min @ 0.06 sec @ 240000 datapoints                         |

| #  | Time   | Type | Area   | Height | Width  | Area%  | Symmetry |
|----|--------|------|--------|--------|--------|--------|----------|
| 1  | 6.674  | BB   | 67.6   | 5      | 0.3227 | 0.296  | 0.742    |
| 2  | 5.91   | BB   | 20.8   | 2.7    | 0.185  | 0.191  | 2.251    |
| 3  | 5.66   | BB   | 26     | 1.5    | 0.2899 | 0.132  | 0.251    |
| 4  | 7.514  | BB   | 38.4   | 1.9    | 0.2144 | 0.264  | 0.681    |
| 5  | 8.899  | BB   | 894.8  | 15.2   | 0.4884 | 3.473  | 1.877    |
| 6  | 9.631  | BB   | 111.6  | 5.5    | 0.2389 | 0.611  | 0.826    |
| 7  | 12.214 | BB   | 6244.5 | 184.7  | 0.4214 | 36.464 | 0.647    |
| 8  | 18.11  | BB   | 64.2   | 2.8    | 0.2208 | 0.298  | 1.02     |
| 9  | 18.202 | BB   | 2404.1 | 38.5   | 0.3389 | 14.037 | 0.952    |
| 10 | 20.976 | BB   | 826.8  | 23.2   | 0.4742 | 4.822  | 1.21     |
| 11 | 21.931 | BB   | 6777.4 | 205.8  | 0.4691 | 29.281 | 1.188    |

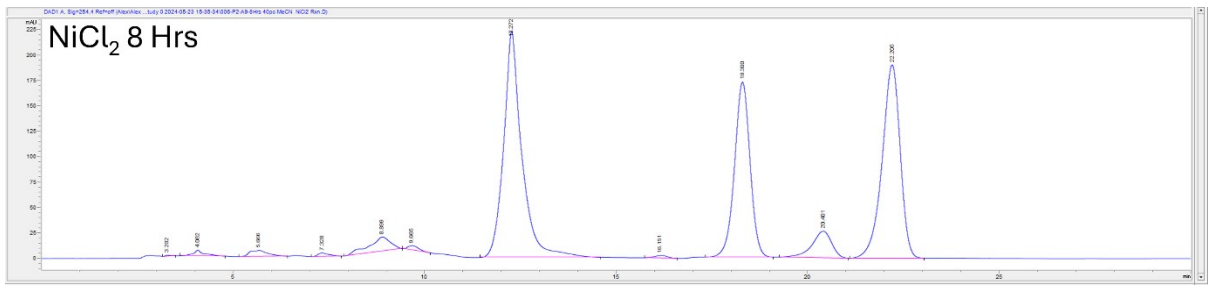

**File Information**

|               |                                                                  |
|---------------|------------------------------------------------------------------|
| LC File       | D:\P2-41-814-814-NiCl2-NiCl2-Run.D                               |
| File Path     | C:\Users\Public\Documents\ChemStation\1\Data\Views\Views Sec.Fpr |
| Date          | 23 May 24, 18:11:10                                              |
| Sample        | 814-NiCl2-NiCl2-Run                                              |
| Sample ID(s)  |                                                                  |
| Operator      | JPT/SM                                                           |
| Method        | Met Purasole LCHS Study Meth.M                                   |
| Reference     |                                                                  |
| Analysis Time | 30 min                                                           |
| Sampling Rate | 0.001 min @ 0.06 sec @ 240000 datapoints                         |

| #  | Time   | Type | Area   | Height | Width  | Area%  | Symmetry |
|----|--------|------|--------|--------|--------|--------|----------|
| 1  | 3.282  | BB   | 13.2   | 1.3    | 0.1217 | 0.061  | 0.511    |
| 2  | 4.052  | BB   | 128.9  | 3.8    | 0.241  | 0.576  | 0.254    |
| 3  | 5.666  | BB   | 185    | 5.3    | 0.3868 | 0.926  | 0.91     |
| 4  | 7.128  | BB   | 87.4   | 3.4    | 0.2982 | 0.329  | 0.611    |
| 5  | 8.899  | BB   | 198.8  | 14.1   | 0.4611 | 0.709  | 0.623    |
| 6  | 9.663  | BB   | 91.1   | 5.1    | 0.2388 | 0.411  | 0.826    |
| 7  | 12.217 | BB   | 792.8  | 32.8   | 0.4001 | 36.829 | 0.751    |
| 8  | 18.11  | BB   | 41.2   | 2.4    | 0.271  | 0.298  | 0.826    |
| 9  | 18.11  | BB   | 866.7  | 17.4   | 0.3821 | 21.711 | 1.04     |
| 10 | 20.91  | BB   | 940.7  | 26.1   | 0.4187 | 4.961  | 1.271    |
| 11 | 22.253 | BB   | 4240.5 | 100.3  | 0.3521 | 36.488 | 1.211    |



# Limit of Detection (LoD) Assays

The method reported by Lee et al was used to calculate limit of detection (LoD) for **P2** in MeCN using the indicated cation with the average from three replicates used.

B. P. Joshi, J. Park, W. I. Lee and K.-H. Lee, *Talanta*, 2009, **78**, 90.

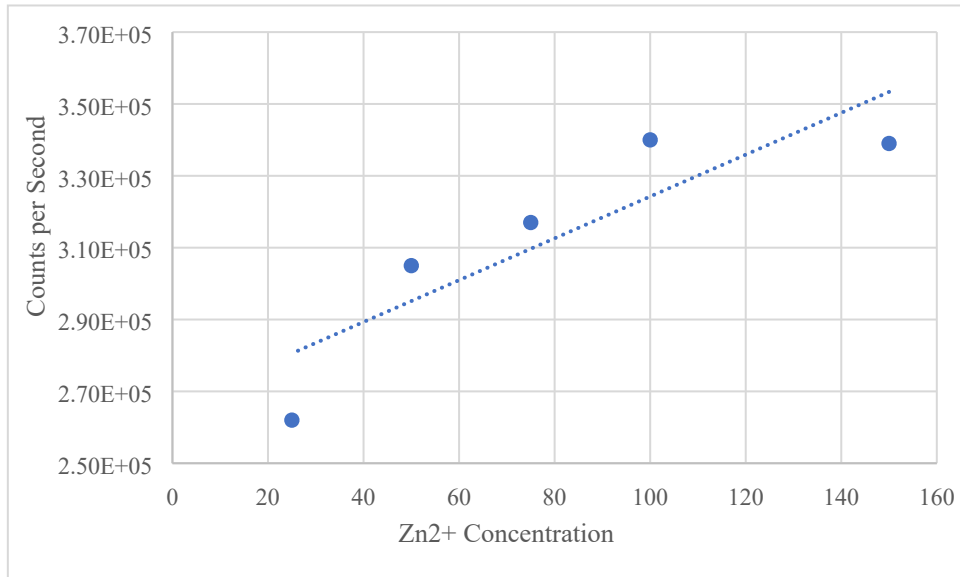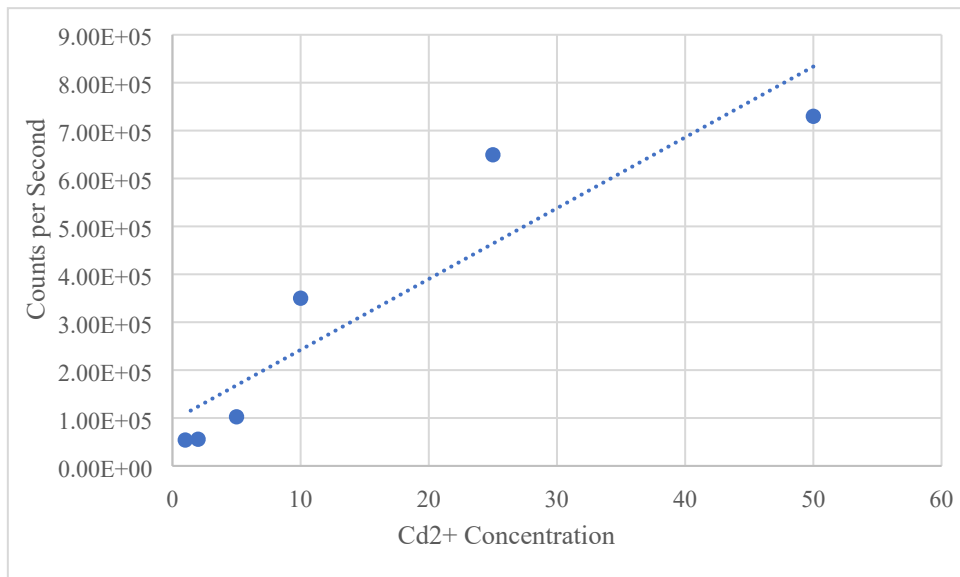

Supplement: d4nj02433h1.pdf [file d4nj02433h1.pdf]
